# Supplementary material for: Comparative Risk Assessment of Severe Uterine Bleeding Following Exposure to Direct Oral Anticoagulants: A Network Study Across Four Observational Databases in the USA
Source: PubMed Central journal article supplement — Drug Saf. 2021 Mar 2;44(4):479–97. doi: 10.1007/s40264-021-01060-4 (PMC7994226; doi:10.1007/s40264-021-01060-4), 2021-03-02
Supplement: 40264_2021_1060_MOESM1_ESM.pdf [file 40264_2021_1060_MOESM1_ESM.pdf]

**Journal:** *Drug Safety*

**Comparative Risk Assessment of Severe Uterine Bleeding Following Exposure to Direct Oral Anticoagulants: A Network Study Across Four Observational Databases in the United States**

James Weaver,<sup>1</sup> Azza Shoaibi,<sup>1</sup> Huy Q. Truong,<sup>2</sup> Leila Larbi,<sup>2</sup> Shujian Wu,<sup>3</sup>  
Peter Wildgoose,<sup>1</sup> Gowtham Rao,<sup>1</sup> Amy Freedman,<sup>1</sup> Lu Wang,<sup>1</sup> Zhong Yuan,<sup>1</sup>  
Elliot Barnathan<sup>2</sup>

<sup>1</sup>Janssen Research & Development, LLC, Titusville, NJ, USA; <sup>2</sup>Janssen Research & Development, LLC, Raritan, NJ, USA; <sup>3</sup>Janssen Research & Development, LLC, Horsham, PA, USA.

**Corresponding Author:**

Zhong Yuan

Janssen Research & Development, LLC

1125 Trenton-Harbourton Road

Titusville, NJ 08560, USA

Telephone: (609) 730-3725

Email: [zyuan6@its.inj.com](mailto:zyuan6@its.inj.com)

ORCID IDs:

James Weaver: <https://orcid.org/0000-0003-0755-5191>

Lu Wang: <https://orcid.org/0000-0001-7225-9407>

Zhong Yuan: <https://orcid.org/0000-0002-5824-2040>

Azza Shaoibi: <https://orcid.org/0000-0002-6976-2594>

**Online Resource 1.** AF population: primary analysis diagnostics (preference score [PS] distribution, covariate balance, and empirical null distribution) for each pairwise comparison: a) rivaroxaban vs warfarin; b) apixaban vs warfarin; c) dabigatran vs warfarin; d) rivaroxaban vs apixaban; e) rivaroxaban vs dabigatran; and f) apixaban vs dabigatran.

AF, atrial fibrillation; CCAE, IBM MarketScan® Commercial Database; MDCD, IBM MarketScan® Multi-state Medicaid; MDCR, IBM MarketScan® Medicare Supplemental Beneficiaries.

The preference score is a transformation of the propensity score that adjusts for differences in the sizes of the two exposure cohorts in a pairwise comparison. A higher overlap indicates patients in the two cohorts were more similar in terms of their predicted probability of receiving one exposure relative to the other. In each preference score plot, the red curve represents the preference score for the first exposure in the comparison label and the blue curve represents the preference score for the second exposure in the comparison label. For example, in plot a) rivaroxaban vs warfarin, the red curve represents the preference score for patients exposed to rivaroxaban and the blue curve represents the preference score for patients exposed to warfarin.

In the covariate balance plots, each data point represents the standardized difference of means for a single covariate before and after propensity score stratification. The x-axis measures the standardized difference of means before propensity score matching and the y-axis measures the standardized difference in means after propensity score matching. Plots where data points are of larger magnitude on the x-axis than on the y-axis represent covariate balance improvement after propensity score stratification.

The empirical calibration plots show effect estimates for the negative controls where the true hazard ratio is expected to equal 1. The x-axis measures the hazard ratio and the y-axis measures the standard error (which is related to the width of the confidence interval of the hazard ratio). Estimates below the diagonal dashed lines are statistically significantly different ( $\alpha = 0.05$ ) from the true effect size. A well-calibrated estimator should produce the true effect sizes within the 95 percent confidence interval 95 percent of the time.

a) Rivaroxaban vs Warfarin

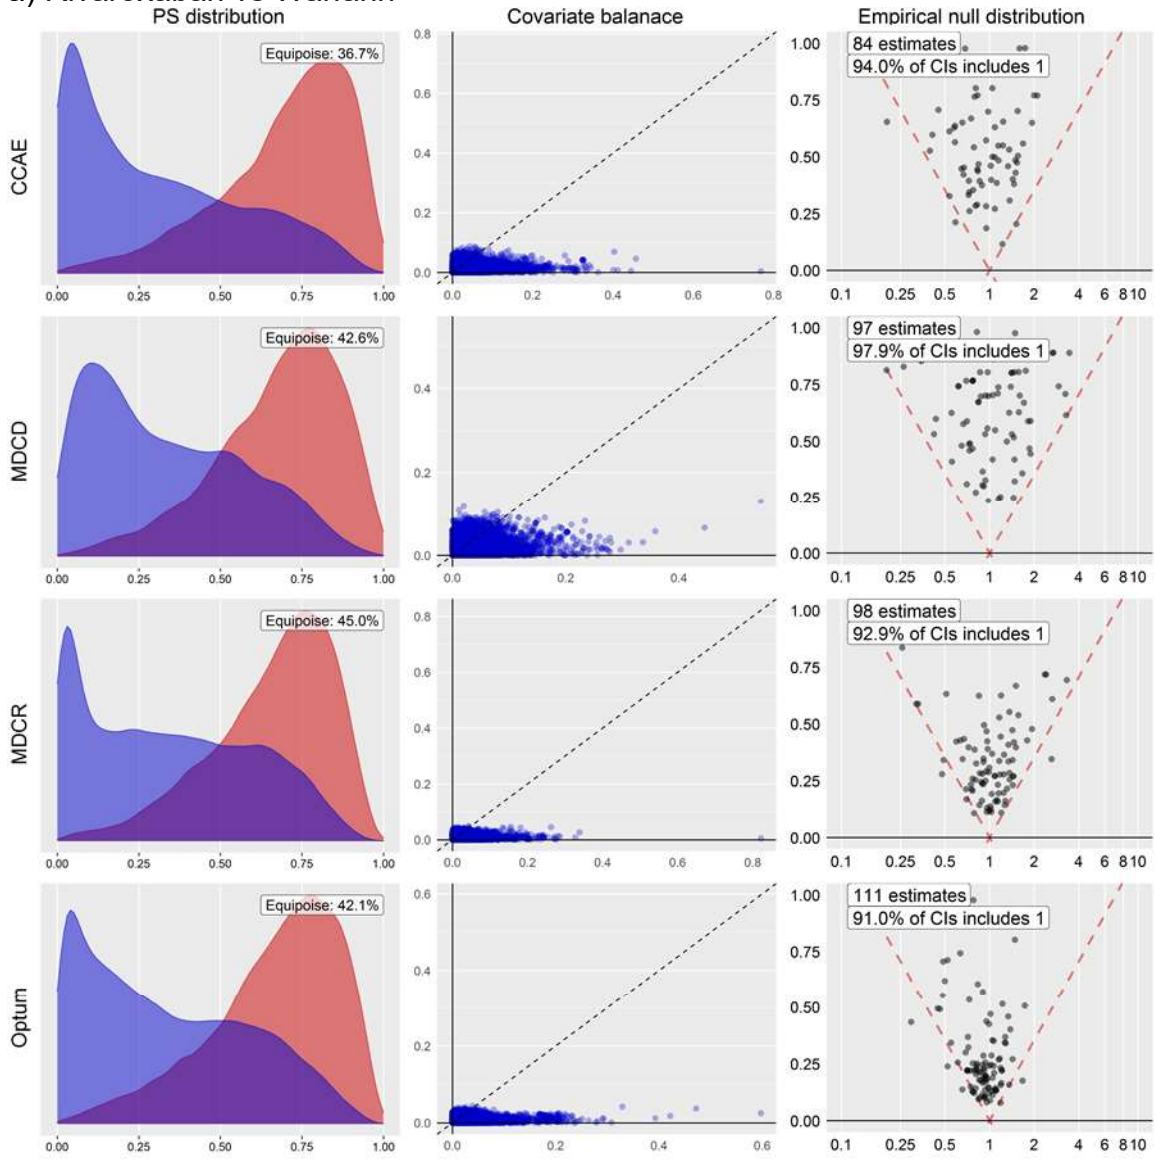

b) Apixaban vs Warfarin  
PS distribution

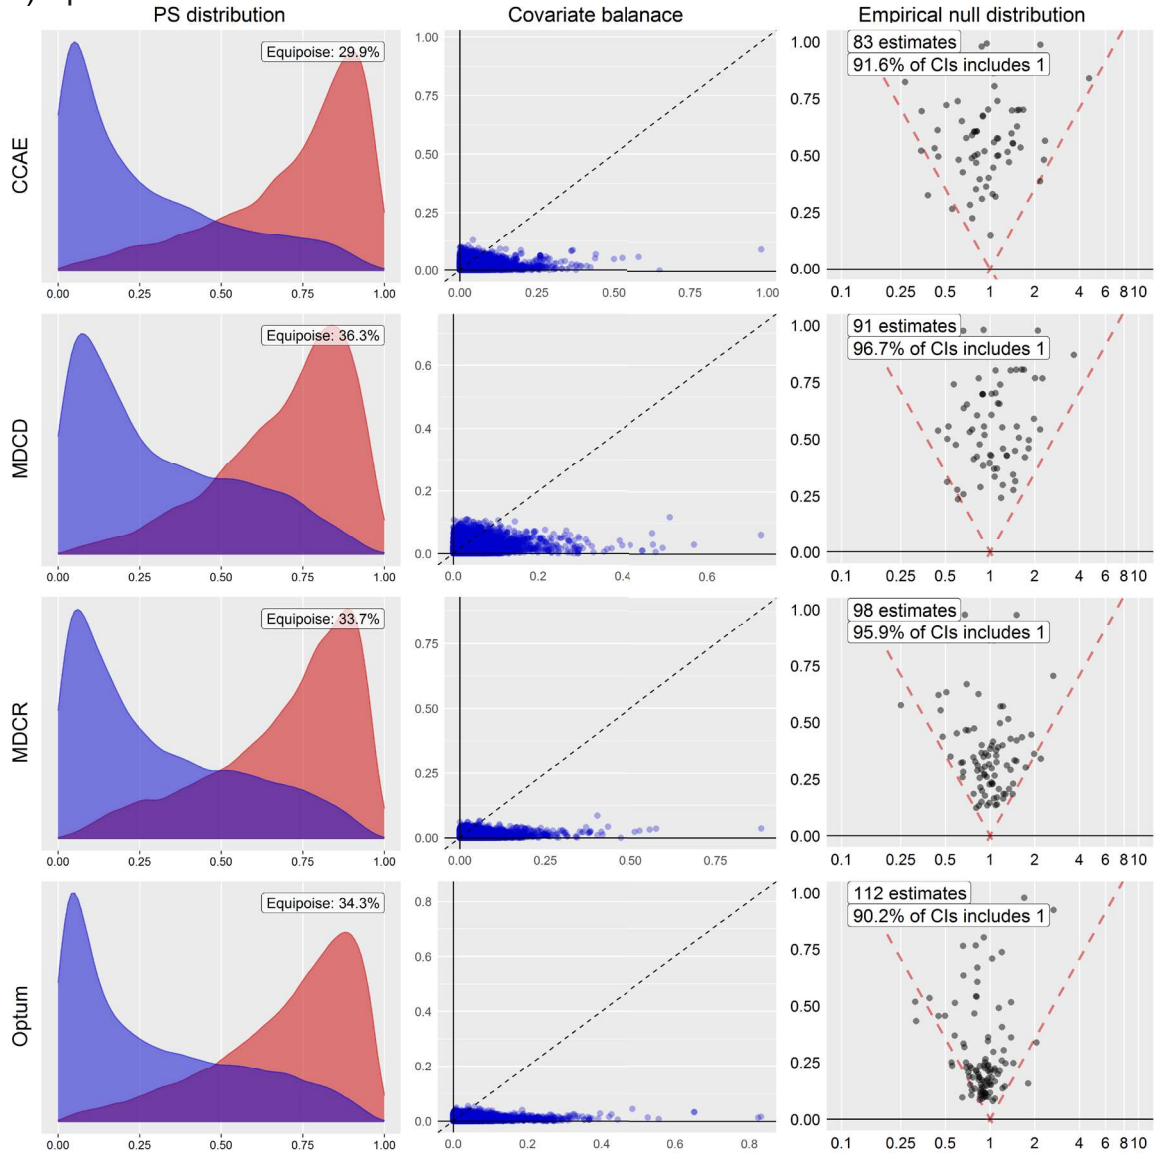

### c) Dabigatran vs Warfarin

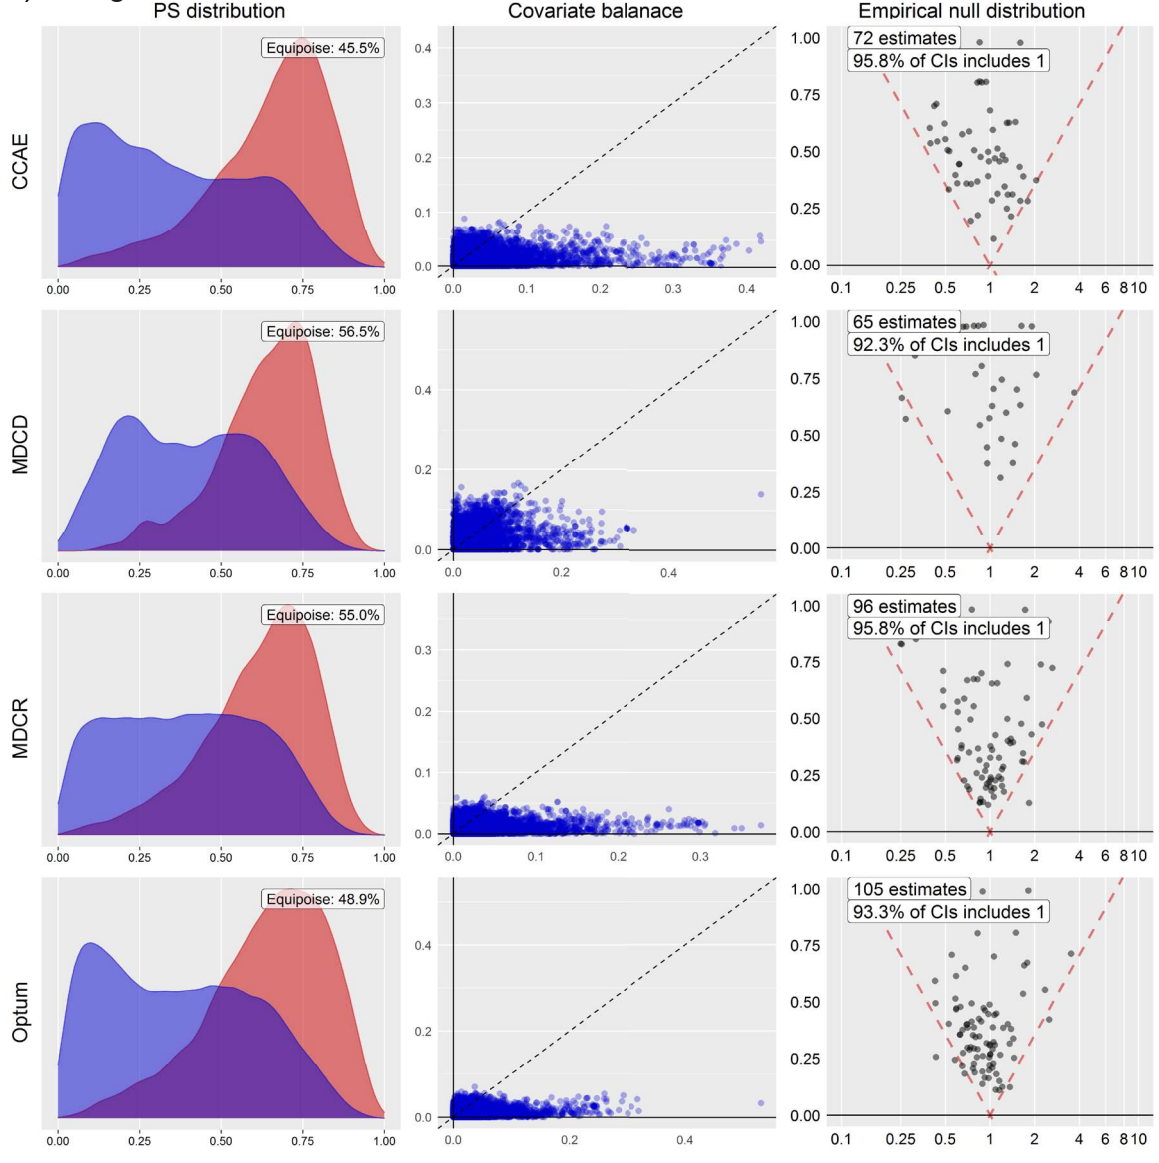

### d) Rivaroxaban vs Apixaban

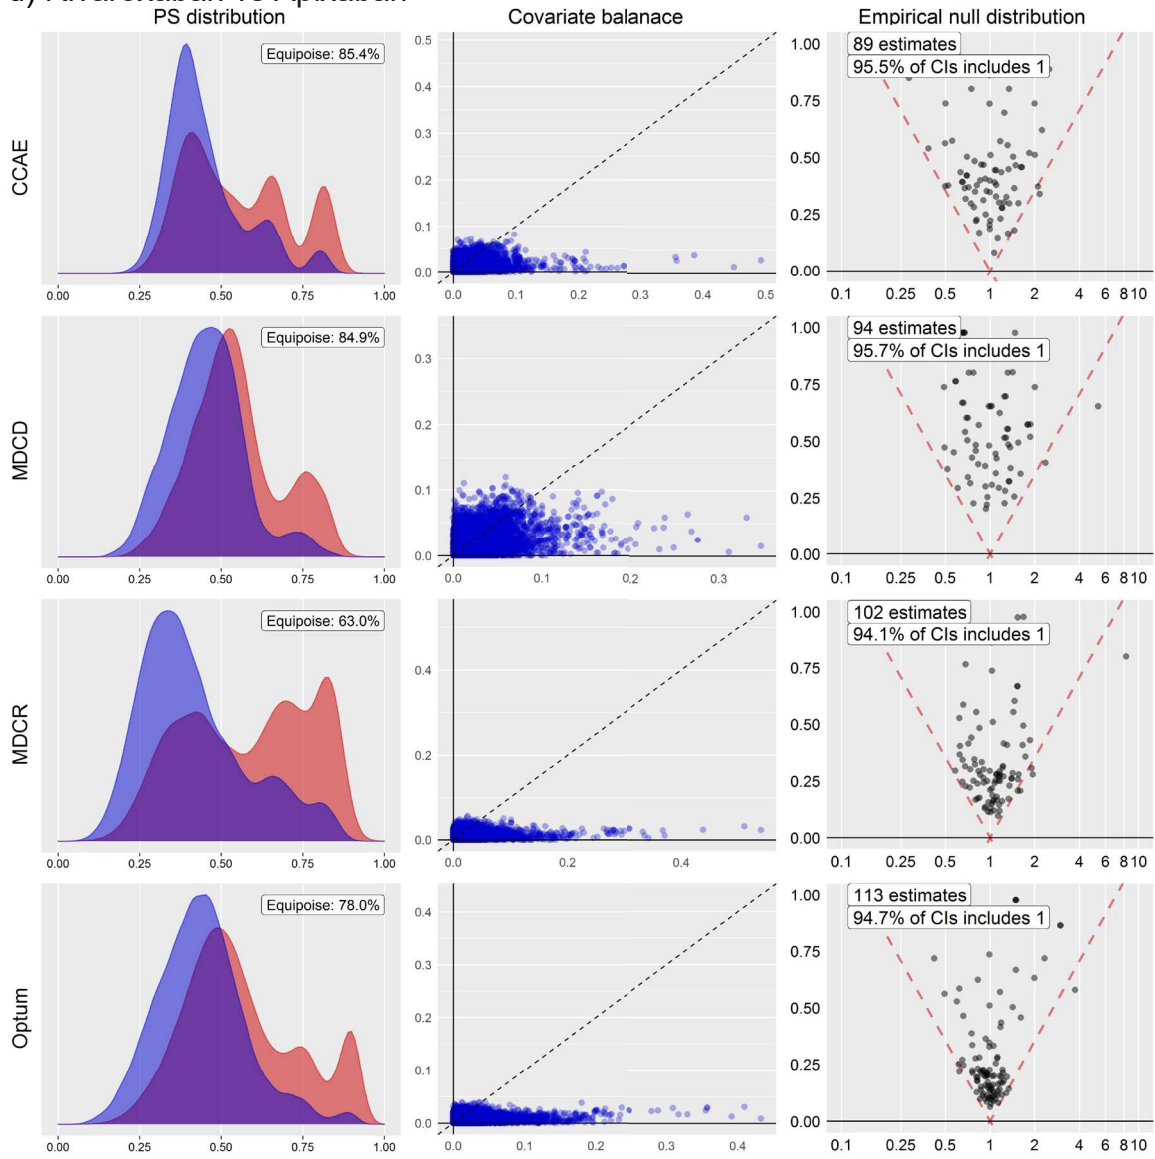

### e) Rivaroxaban vs Dabigatran

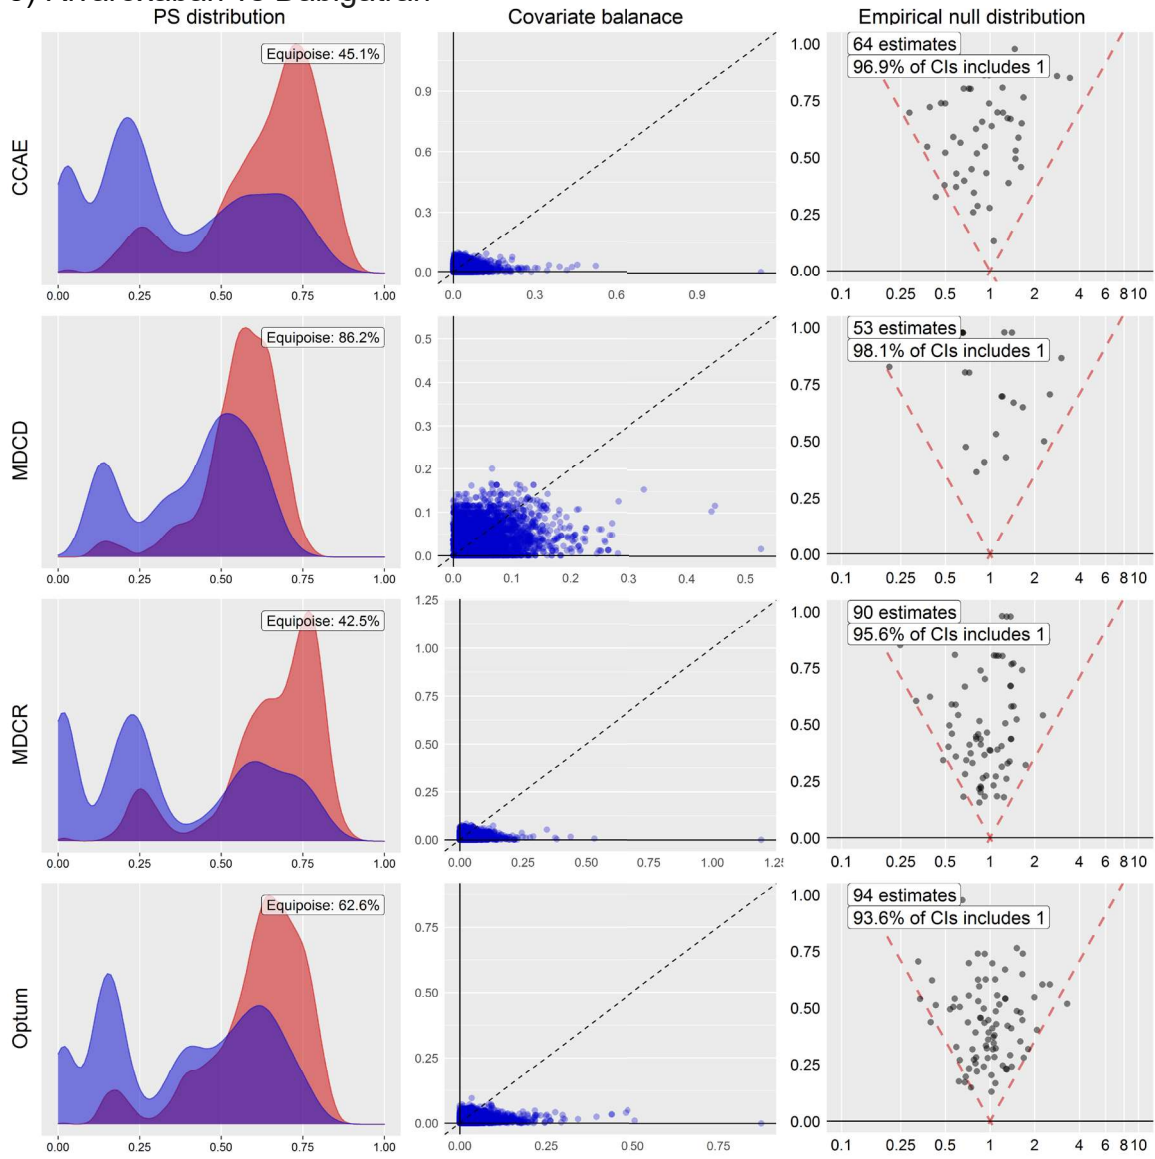

f) Apixaban vs Dabigatran  
PS distribution

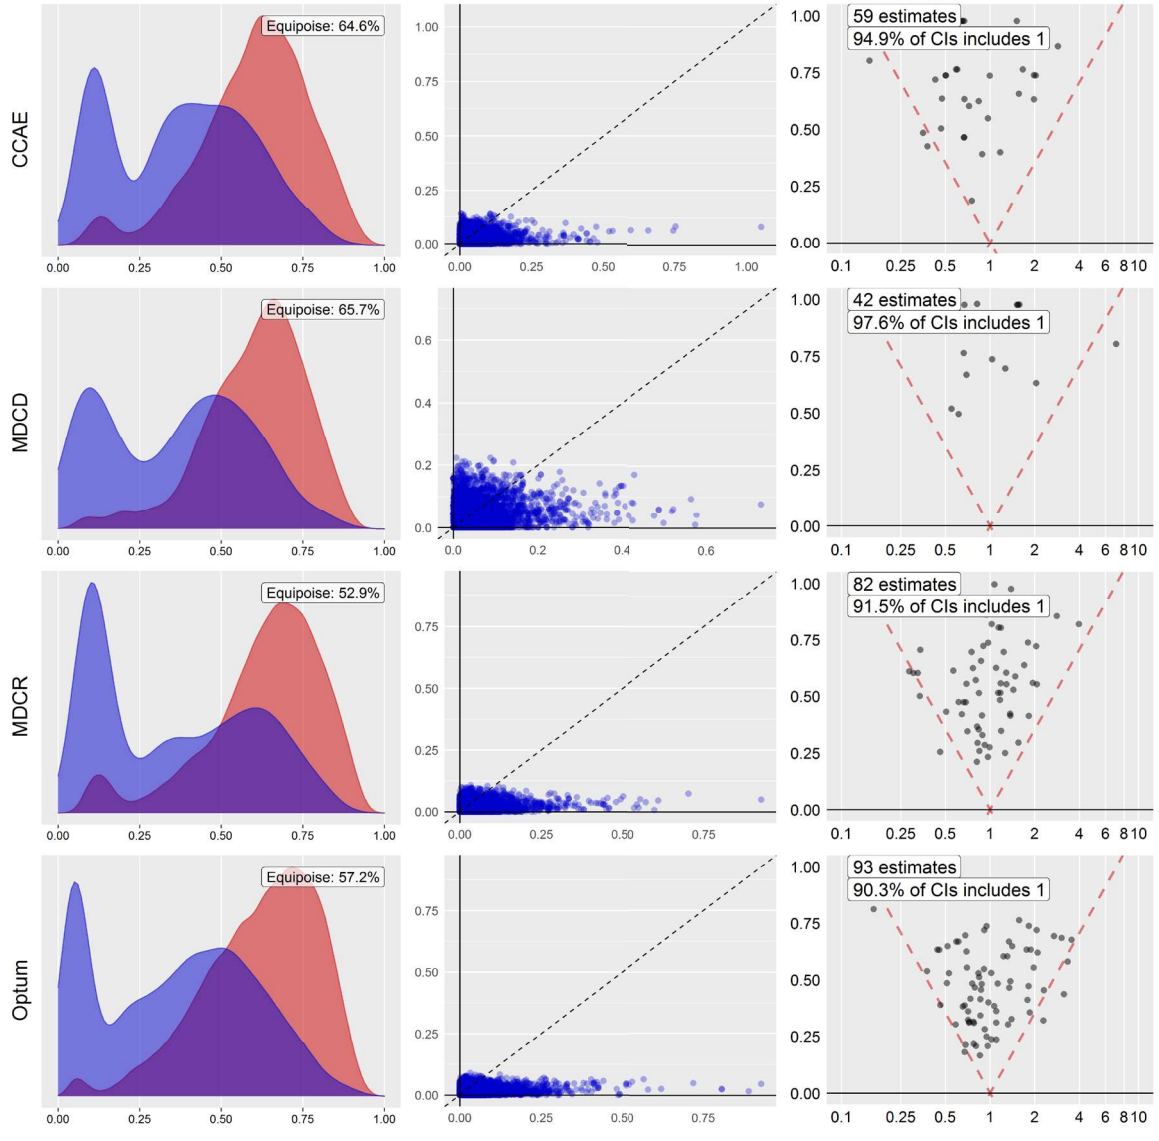



**Online Resource 2.** VTE population: primary analysis diagnostics (preference score [PS] distribution, covariate balance, empirical null distribution) for each pairwise comparison: a) rivaroxaban vs warfarin; b) apixaban vs warfarin; c) dabigatran vs warfarin; d) rivaroxaban vs apixaban; e) rivaroxaban vs dabigatran; and f) apixaban vs dabigatran.

CCAE, IBM MarketScan® Commercial Database; MDCD, IBM MarketScan® Multi-state Medicaid; MDCR, IBM MarketScan® Medicare Supplemental Beneficiaries; VTE, venous thromboembolism.

The preference score is a transformation of the propensity score that adjusts for differences in the sizes of the two exposure cohorts in a pairwise comparison. A higher overlap indicates patients in the two cohorts were more similar in terms of their predicted probability of receiving one exposure relative to the other. In each preference score plot, the red curve represents the preference score for the first exposure in the comparison label and the blue curve represents the preference score for the second exposure in the comparison label. For example, in plot a) rivaroxaban vs warfarin, the red curve represents the preference score for patients exposed to rivaroxaban and the blue curve represents the preference score for patients exposed to warfarin. Note that a propensity score model was unable to be fit for rivaroxaban vs dabigatran in the MDCD database.

In the covariate balance plots, each data point represents the standardized difference of means for a single covariate before and after propensity score stratification. The x-axis measures the standardized difference of means before propensity score matching and the y-axis measures the standardized difference in means after propensity score matching. Plots where data points are of larger magnitude on the x-axis than on the y-axis represent covariate balance improvement after propensity score stratification.

The empirical calibration plots show effect estimates for the negative controls where the true hazard ratio is expected to equal 1. The x-axis measures the hazard ratio and the y-axis measures the standard error (which is related to the width of the confidence interval of the hazard ratio). Estimates below the diagonal dashed lines are statistically significantly different ( $\alpha = 0.05$ ) from the true effect size. A well-calibrated estimator should produce the true effect sizes within the 95 percent confidence interval 95 percent of the time.

a) Rivaroxaban vs Warfarin  
PS distribution

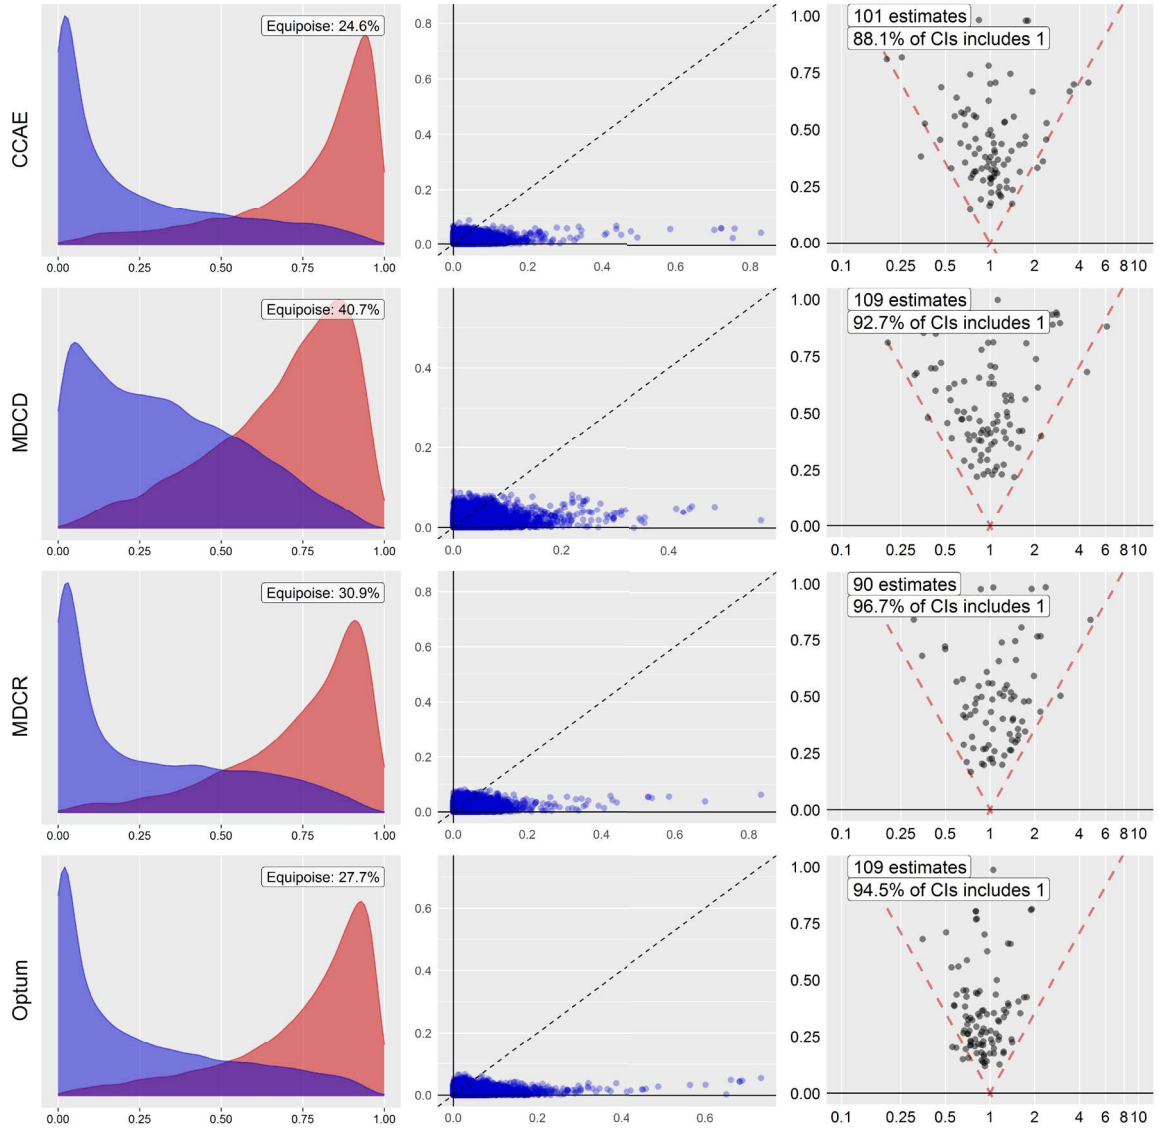

b) Apixaban vs Warfarin  
PS distribution

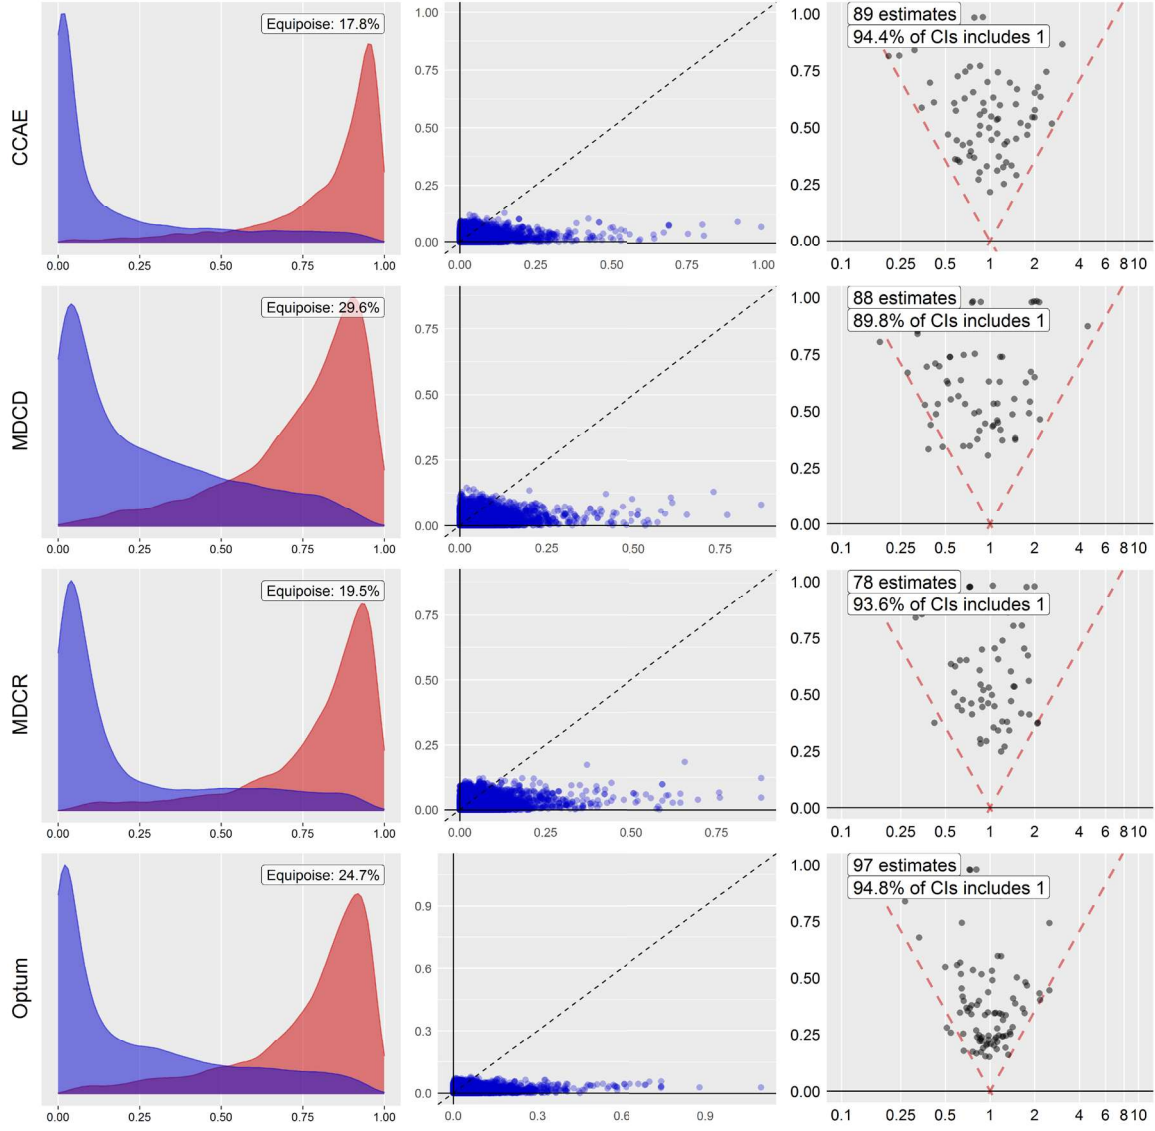

### c) Dabigatran vs Warfarin

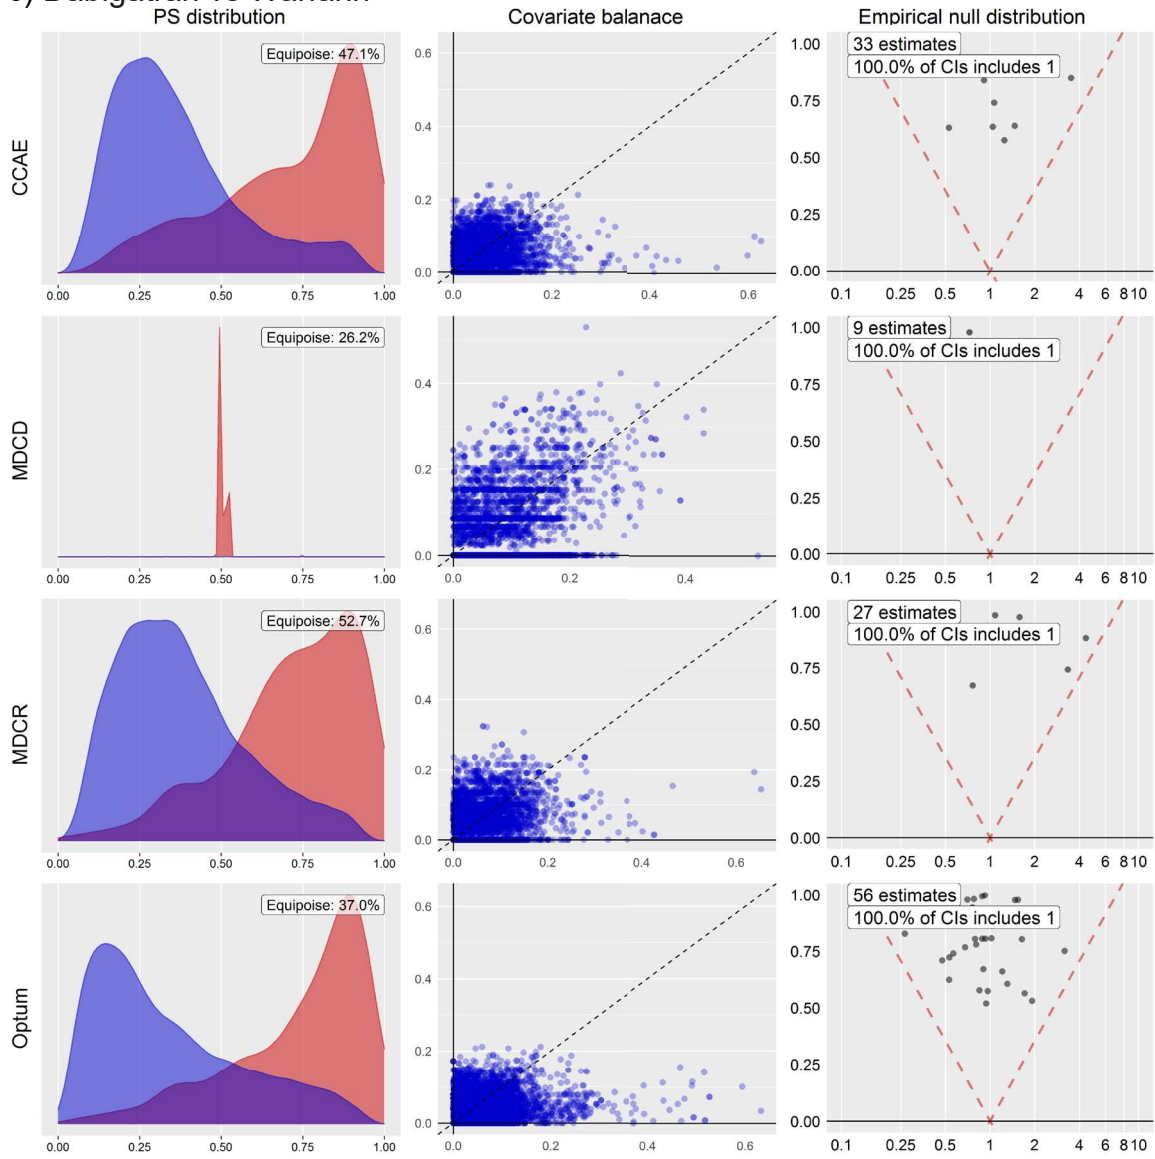

### d) Rivaroxaban vs Apixaban

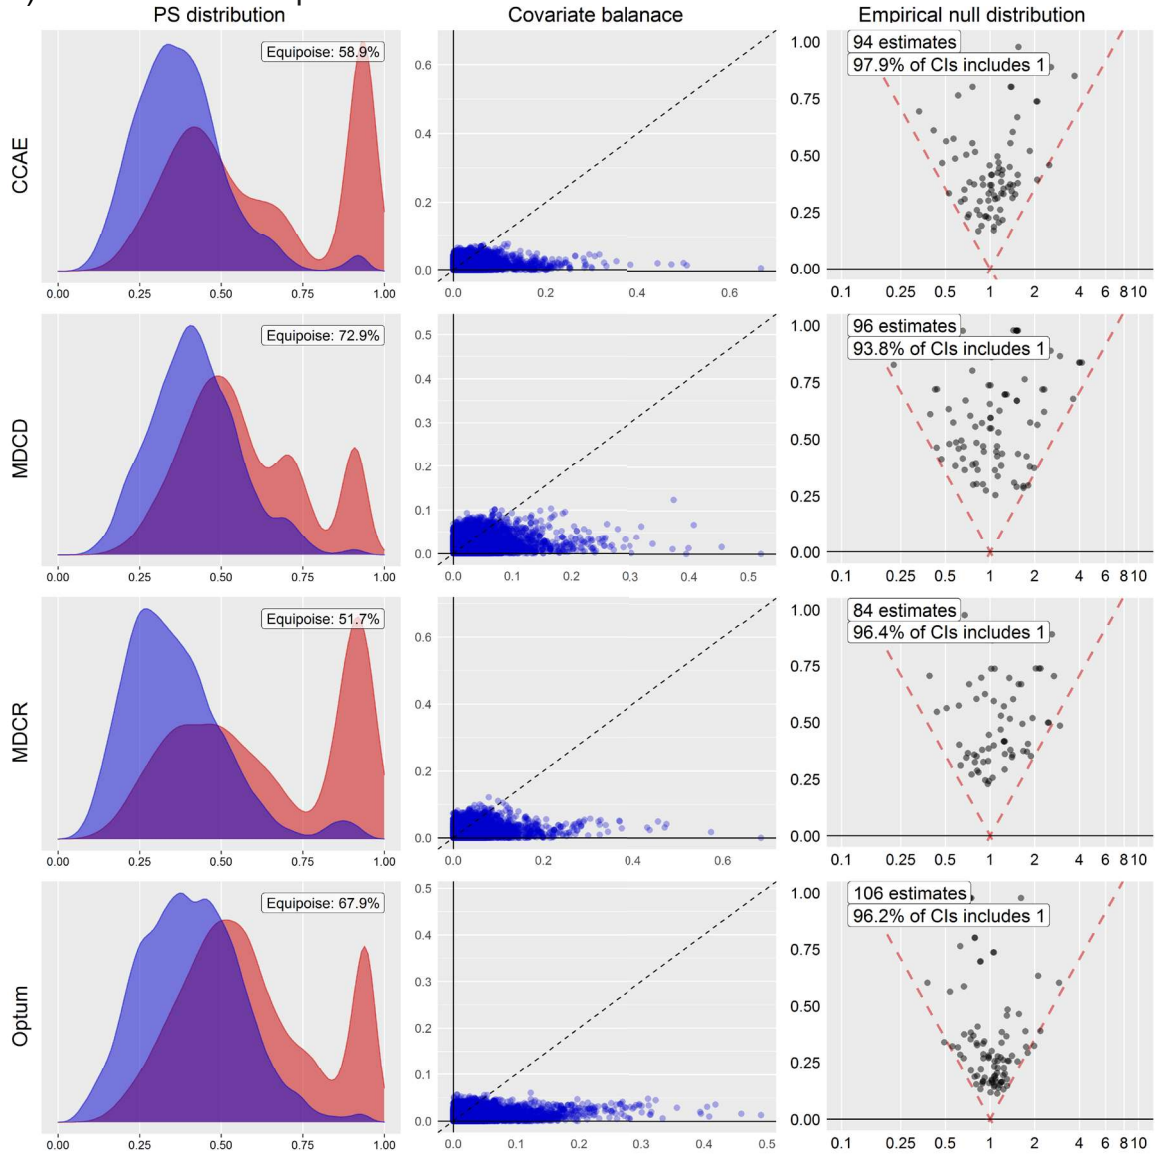

### e) Rivaroxaban vs Dabigatran

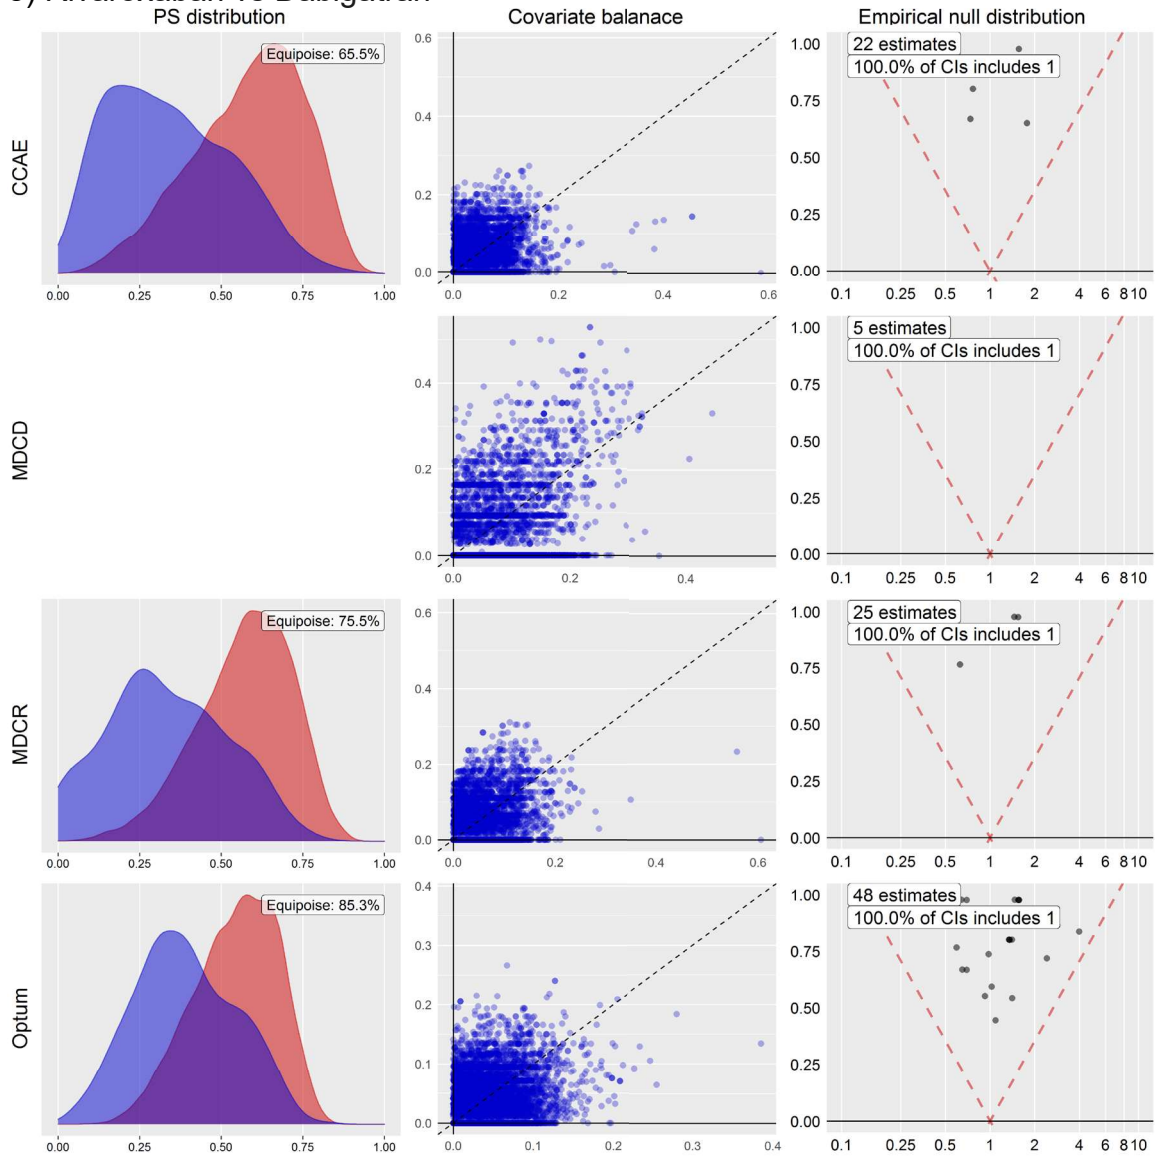

# f) Apixaban vs Dabigatran

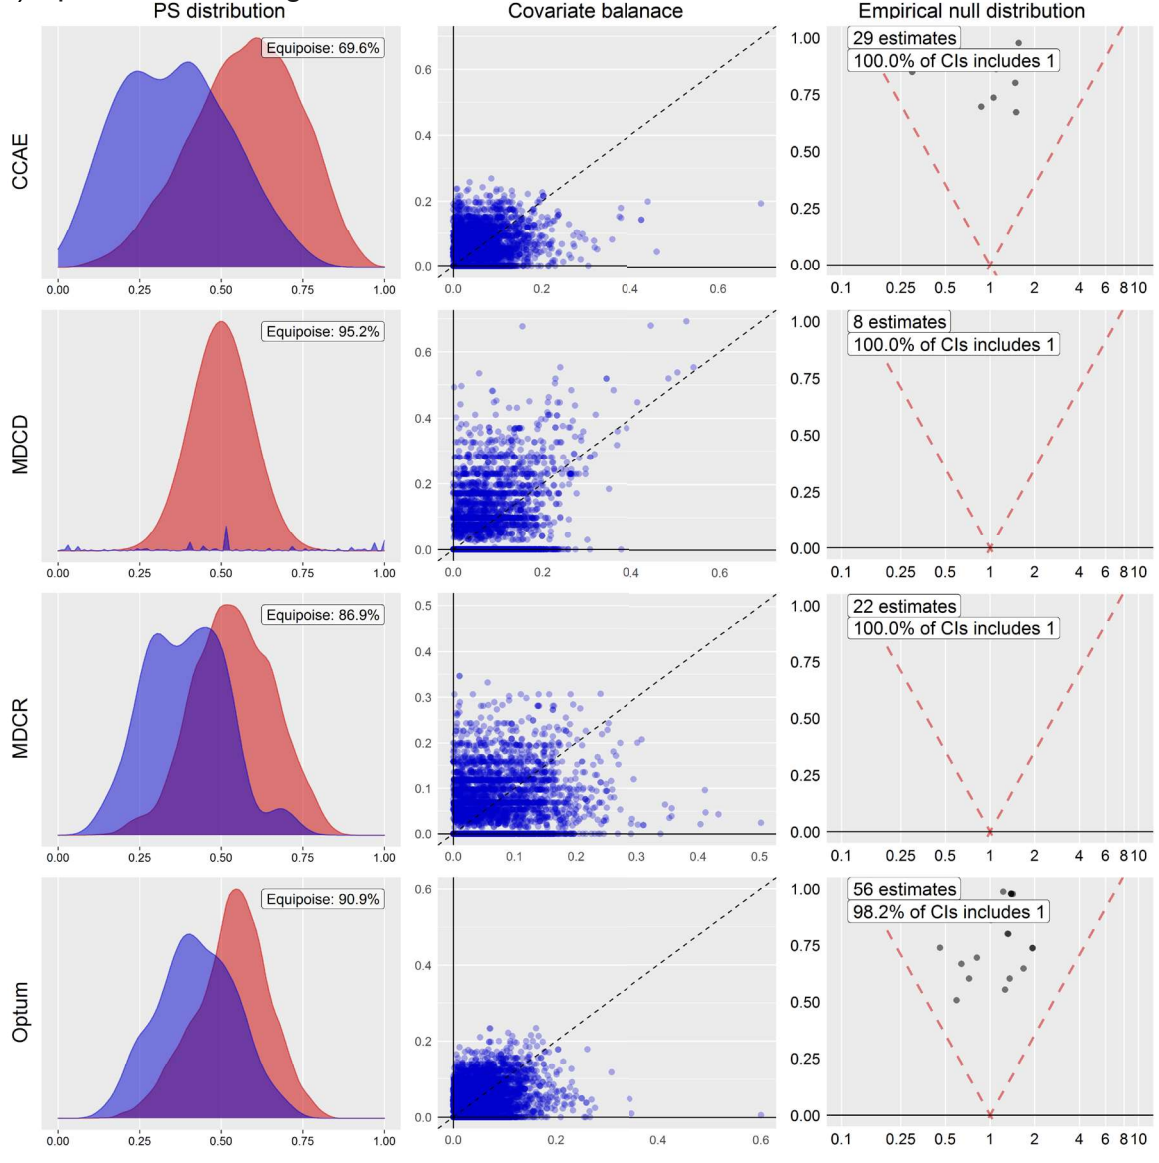

**Online Resource 3.** Negative control outcomes used for empirical calibration.

|                                                     |                                                                   |                                                            |
|-----------------------------------------------------|-------------------------------------------------------------------|------------------------------------------------------------|
| Abnormal posture                                    | Functional urinary incontinence                                   | Paranoid schizophrenia                                     |
| Abscess of abdominal wall                           | Generalized hyperhidrosis                                         | Paresthesia                                                |
| Acute bronchospasm                                  | Herpes zoster without complication                                | Patient dependence on care provider                        |
| Acute mycoplasma bronchitis                         | Hyperglycemia due to type 2 diabetes mellitus                     | Postoperative hypothyroidism                               |
| Acute upper respiratory infection                   | Hyperparathyroidism                                               | Posttraumatic stress disorder                              |
| Acute vaginitis                                     | Idiopathic sleep related non-obstructive alveolar hypoventilation | Pseudobulbar affect                                        |
| Adjustment disorder with depressed mood             | Imaging of abdomen abnormal                                       | Psychoactive substance dependence                          |
| Alcohol dependence                                  | Imaging of gastrointestinal tract abnormal                        | Psychologic conversion disorder                            |
| Altered sensation of skin                           | Impacted cerumen                                                  | Pure hyperglyceridemia                                     |
| Anesthesia of skin                                  | Impaired fasting glycaemia                                        | Restless legs                                              |
| Anhedonia                                           | Impingement syndrome of shoulder region                           | Retrograde amnesia                                         |
| Asymptomatic human immunodeficiency virus infection | Incontinence of feces                                             | Schizoaffective disorder                                   |
| Attention deficit hyperactivity disorder            | Incoordination                                                    | Schizophreniform disorder                                  |
| Bacteremia                                          | Increased frequency of urination                                  | Sepsis due to methicillin resistant Staphylococcus aureus  |
| Bacterial infection due to Klebsiella pneumoniae    | Infection by methicillin sensitive Staphylococcus aureus          | Severe mixed bipolar I disorder without psychotic features |
| Bipolar I disorder                                  | Infection due to Escherichia coli                                 | Severe protein-calorie malnutrition                        |
| Bipolar II disorder                                 | Ingrowing nail                                                    | Shoulder stiff                                             |
| Blood glucose abnormal                              | Intra-abdominal and pelvic swelling, mass and lump                | Sickle cell trait                                          |
| Borderline personality disorder                     | Ketoacidosis in type 1 diabetes mellitus                          | Simple goiter                                              |
| Candida infection of genital region                 | Ketoacidosis in type 2 diabetes mellitus                          | Skin sensation disturbance                                 |
| Cannabis abuse                                      | Knee stiff                                                        | Slurred speech                                             |
| Cervical somatic dysfunction                        | Lichenification and lichen simplex chronicus                      | Snoring                                                    |
| Chronic fatigue syndrome                            | Localized enlarged lymph nodes                                    | Solitary nodule of lung                                    |
| Chronic hepatitis C                                 | Localized infection of skin and/or subcutaneous tissue            | Spinal stenosis of lumbar region                           |
| Chronic pain syndrome                               | Localized swelling, mass and lump, trunk                          | Stimulant dependence                                       |
| Chronic post-traumatic stress disorder              | Malnutrition of moderate degree                                   | Suicidal thoughts                                          |
| Chronic schizoaffective schizophrenia               | Mammography abnormal                                              | Tension-type headache                                      |
| Cocaine abuse                                       | Methicillin resistant Staphylococcus aureus infection             | Thyroid function tests abnormal                            |
| Continuous opioid dependence                        | Mild protein-calorie malnutrition                                 | Thyrotoxicosis without goiter or other cause               |



|                                    |                                                            |                                        |
|------------------------------------|------------------------------------------------------------|----------------------------------------|
| Coordination problem               | Mixed urinary incontinence                                 | Tobacco dependence syndrome            |
| Cramp in limb                      | Moderate intellectual disability                           | Toxic diffuse goiter with no crisis    |
| Crohn's disease                    | Moderate protein-calorie malnutrition                      | Type 1 diabetes mellitus uncontrolled  |
| Dependence on supplemental oxygen  | Nasal congestion                                           | Type II diabetes mellitus uncontrolled |
| Diabetic ketoacidosis without coma | Neurogenic bladder                                         | Uncomplicated umbilical hernia         |
| Difficulty speaking                | Nicotine dependence                                        | Unsteady when standing                 |
| Disorientated                      | Non-toxic unimodular goiter                                | Urinary incontinence                   |
| Dysphagia                          | Obsessive-compulsive disorder                              | Viral hepatitis B without hepatic coma |
| Eating disorder                    | Obstructive sleep apnea syndrome                           | Viral hepatitis C                      |
| Eosinophilic asthma                | Onychomycosis due to dermatophyte                          | Vitamin B deficiency                   |
| Falls                              | Open wound of anterior abdominal wall without complication | Vitamin D deficiency                   |
| Female stress incontinence         | Opioid dependence                                          | Wheezing                               |

**Online Resource 4.** Study cohort counts by a) indication and exposure and b) database and indication.

a)

| Indication            | Exposure                 | Database | Patients | Exposure % |
|-----------------------|--------------------------|----------|----------|------------|
| AF (n = 221,368)      | Rivaroxaban (n = 46,827) | CCAIE    | 7,525    | 16.07      |
|                       |                          | MDCD     | 2,622    | 5.6        |
|                       |                          | MDCR     | 14,817   | 31.64      |
|                       |                          | Optum    | 21,863   | 46.69      |
|                       | Apixaban (n = 69,727)    | CCAIE    | 8,247    | 11.83      |
|                       |                          | MDCD     | 3,363    | 4.82       |
|                       |                          | MDCR     | 18,499   | 26.53      |
|                       |                          | Optum    | 39,618   | 56.82      |
|                       | Dabigatran (n = 21,025)  | CCAIE    | 4,193    | 19.94      |
|                       |                          | MDCD     | 743      | 3.53       |
|                       |                          | MDCR     | 8,571    | 40.77      |
|                       |                          | Optum    | 7,518    | 35.76      |
| Warfarin (n = 83,789) | CCAIE                    | 8,800    | 10.5     |            |
|                       | MDCD                     | 5,530    | 6.6      |            |
|                       | MDCR                     | 28,240   | 33.7     |            |
|                       | Optum                    | 41,219   | 49.19    |            |
| VTE (n = 142,551)     | Rivaroxaban (n = 37,401) | CCAIE    | 12,270   | 32.81      |
|                       |                          | MDCD     | 4,808    | 12.86      |
|                       |                          | MDCR     | 5,834    | 15.6       |
|                       |                          | Optum    | 14,489   | 38.74      |
|                       | Apixaban (n = 20,568)    | CCAIE    | 5,203    | 25.3       |
|                       |                          | MDCD     | 2,414    | 11.74      |
|                       |                          | MDCR     | 2,931    | 14.25      |
|                       |                          | Optum    | 10,020   | 48.72      |
|                       | Dabigatran (n = 1,055)   | CCAIE    | 326      | 30.9       |
|                       |                          | MDCD     | 89       | 8.44       |
|                       |                          | MDCR     | 206      | 19.53      |
|                       |                          | Optum    | 434      | 41.14      |
|                       | Warfarin (n = 83,527)    | CCAIE    | 25,955   | 31.07      |
|                       |                          | MDCD     | 9,284    | 11.11      |
|                       |                          | MDCR     | 17,892   | 21.42      |
|                       |                          | Optum    | 30,396   | 36.39      |

b)

| Database            | Indication       | Exposure    | Patients | Database % |
|---------------------|------------------|-------------|----------|------------|
| CCAIE (n = 115,410) | AF (n = 28,765)  | Rivaroxaban | 7,525    | 6.52       |
|                     |                  | Apixaban    | 8,247    | 7.15       |
|                     |                  | Dabigatran  | 4,193    | 3.63       |
|                     |                  | Warfarin    | 8,800    | 7.62       |
|                     | VTE (n = 43,754) | Rivaroxaban | 12,270   | 10.63      |
|                     |                  | Apixaban    | 5,203    | 4.51       |
|                     |                  | Dabigatran  | 326      | 0.28       |
|                     |                  | Warfarin    | 25,955   | 22.49      |
| MDCD (n = 33,678)   | AF (n = 12,258)  | Rivaroxaban | 2,622    | 7.79       |
|                     |                  | Apixaban    | 3,363    | 9.99       |
|                     |                  | Dabigatran  | 743      | 2.21       |
|                     |                  | Warfarin    | 5,530    | 16.42      |
|                     | VTE (n = 16,595) | Rivaroxaban | 4,808    | 14.28      |
|                     |                  | Apixaban    | 2,414    | 7.17       |
|                     |                  | Dabigatran  | 89       | 0.26       |
|                     |                  | Warfarin    | 9,284    | 27.57      |
| MDCR (n = 118,536)  | AF (n = 70,127)  | Rivaroxaban | 14,817   | 12.5       |
|                     |                  | Apixaban    | 18,499   | 15.61      |
|                     |                  | Dabigatran  | 8,571    | 7.23       |
|                     |                  | Warfarin    | 28,240   | 23.82      |
|                     | VTE (n = 26,863) | Rivaroxaban | 5,834    | 4.92       |
|                     |                  | Apixaban    | 2,931    | 2.47       |
|                     |                  | Dabigatran  | 206      | 0.17       |
|                     |                  | Warfarin    | 17,892   | 15.09      |
| Optum (n = 201,590) | AF (n = 110,218) | Rivaroxaban | 21,863   | 10.85      |
|                     |                  | Apixaban    | 39,618   | 19.65      |

|  |                  |             |        |       |
|--|------------------|-------------|--------|-------|
|  |                  | Dabigatran  | 7,518  | 3.73  |
|  |                  | Warfarin    | 41,219 | 20.45 |
|  | VTE (n = 55,339) | Rivaroxaban | 14,489 | 7.19  |
|  |                  | Apixaban    | 10,020 | 4.97  |
|  |                  | Dabigatran  | 434    | 0.22  |
|  |                  | Warfarin    | 30,396 | 15.08 |

AF, atrial fibrillation; CCAE, IBM MarketScan® Commercial Database; MDCD, IBM MarketScan® Multi-state Medicaid; MDCR, IBM MarketScan® Medicare Supplemental Beneficiaries; VTE, venous thromboembolism.

**Online Resource 5.** Age distribution of study cohorts by indication, exposure, and data source

| Indication | Exposure    | Database | n      | Mean (years) | SD    | Min | 25%ile | Median | 75%ile | Max |
|------------|-------------|----------|--------|--------------|-------|-----|--------|--------|--------|-----|
| AF         | Rivaroxaban | CCAIE    | 7,525  | 58.03        | 6.32  | 19  | 55     | 60     | 63     | 65  |
|            |             | MDCD     | 2,622  | 63.84        | 13.08 | 21  | 56     | 63     | 74     | 90  |
|            |             | MDCR     | 14,817 | 78.2         | 7.62  | 52  | 72     | 78     | 84     | 109 |
|            |             | Optum    | 21,863 | 74.37        | 9.53  | 22  | 68     | 75     | 82     | 89  |
|            | Apixaban    | CCAIE    | 8,247  | 58.43        | 5.98  | 18  | 56     | 60     | 63     | 65  |
|            |             | MDCD     | 3,363  | 65.92        | 12.75 | 19  | 58     | 64     | 76     | 90  |
|            |             | MDCR     | 18,499 | 79.69        | 7.9   | 54  | 73     | 80     | 86     | 103 |
|            |             | Optum    | 39,618 | 76.25        | 9.06  | 23  | 70     | 77     | 84     | 89  |
|            | Dabigatran  | CCAIE    | 4,193  | 58.22        | 6.17  | 20  | 56     | 60     | 63     | 65  |
|            |             | MDCD     | 743    | 66.42        | 12.51 | 21  | 58     | 66     | 76     | 90  |
|            |             | MDCR     | 8,571  | 78.05        | 7.36  | 54  | 72     | 78     | 84     | 105 |
|            |             | Optum    | 7,518  | 73.42        | 9.38  | 25  | 68     | 74     | 82     | 89  |
|            | Warfarin    | CCAIE    | 8,800  | 57.91        | 6.59  | 18  | 55     | 60     | 63     | 65  |
|            |             | MDCD     | 5,530  | 65.98        | 13.27 | 18  | 57     | 64     | 77     | 90  |
|            |             | MDCR     | 28,240 | 79.47        | 7.49  | 50  | 74     | 80     | 85     | 106 |
|            |             | Optum    | 41,219 | 76.12        | 8.58  | 19  | 71     | 78     | 83     | 89  |
| VTE        | Rivaroxaban | CCAIE    | 12,270 | 51.76        | 10.39 | 18  | 46     | 54     | 60     | 65  |
|            |             | MDCD     | 4,808  | 47.75        | 14.69 | 18  | 36     | 48     | 58     | 90  |
|            |             | MDCR     | 5,834  | 76.65        | 8.08  | 46  | 70     | 76     | 83     | 105 |
|            |             | Optum    | 14,489 | 66.1         | 14.65 | 18  | 57     | 68     | 77     | 89  |
|            | Apixaban    | CCAIE    | 5,203  | 52.67        | 10.24 | 18  | 47     | 55     | 61     | 65  |
|            |             | MDCD     | 2,414  | 50.19        | 15.11 | 18  | 39     | 51     | 60     | 90  |
|            |             | MDCR     | 2,931  | 78.25        | 8.53  | 43  | 71     | 78     | 85     | 104 |
|            |             | Optum    | 10,020 | 70.59        | 13.25 | 18  | 64     | 72     | 80.25  | 89  |
|            | Dabigatran  | CCAIE    | 326    | 51.76        | 10.58 | 18  | 46     | 54     | 60     | 65  |
|            |             | MDCD     | 89     | 49.89        | 15    | 22  | 41     | 50     | 58     | 88  |
|            |             | MDCR     | 206    | 78.05        | 8.69  | 53  | 71     | 78     | 85     | 96  |
|            |             | Optum    | 434    | 66.64        | 14.14 | 21  | 57     | 69     | 77     | 89  |
|            | Warfarin    | CCAIE    | 25,955 | 51.45        | 10.73 | 18  | 45     | 54     | 60     | 65  |
|            |             | MDCD     | 9,284  | 49.29        | 15.58 | 18  | 37     | 50     | 60     | 90  |
|            |             | MDCR     | 17,892 | 77.79        | 8.39  | 44  | 71     | 77     | 84     | 103 |
|            |             | Optum    | 30,396 | 68.06        | 14.3  | 18  | 60     | 70     | 80     | 89  |

AF, atrial fibrillation; CCAIE, IBM MarketScan® Commercial Database; MDCD, IBM MarketScan® Multi-state Medicaid; MDCR, IBM MarketScan® Medicare Supplemental Beneficiaries; SD, standard deviation; VTE, venous thromboembolism.

Selected baseline characteristics in the AF population (Online Resources 6-10) and VTE population (Online Resources 11-15) before and after 1:1 PS matching for each pairwise comparison are reported. A reader can review the full set of baseline characteristics by using the online application (<https://data.ohdsi.org/DoacsWarfarinSub/>). The online application is searchable for the baseline prevalence of any covariate by navigating to the “population characteristics” tab and selecting the “raw” view and searching for a covariate of interest.

**Online Resource 6.** Baseline characteristics before and after 1:1 PS matching in the AF population in the Optum database: Apixaban vs Warfarin

| Characteristic                           | Before matching |               |           | After matching |               |           |
|------------------------------------------|-----------------|---------------|-----------|----------------|---------------|-----------|
|                                          | Apixaban<br>%   | Warfarin<br>% | Std. diff | Apixaban<br>%  | Warfarin<br>% | Std. diff |
| Age group, years                         |                 |               |           |                |               |           |
| 25-29                                    | 0.0             | 0.0           | -0.01     | 0.0            | 0.0           | 0.00      |
| 30-34                                    | 0.0             | 0.1           | -0.01     | 0.0            | 0.1           | -0.01     |
| 35-39                                    | 0.1             | 0.1           | -0.02     | 0.1            | 0.1           | -0.02     |
| 40-44                                    | 0.2             | 0.2           | 0.00      | 0.2            | 0.2           | 0.02      |
| 45-49                                    | 0.5             | 0.4           | 0.01      | 0.5            | 0.4           | 0.01      |
| 50-54                                    | 1.1             | 1.1           | 0.00      | 1.1            | 1.0           | 0.01      |
| 55-59                                    | 2.6             | 2.5           | 0.01      | 2.2            | 2.1           | 0.00      |
| 60-64                                    | 4.9             | 4.7           | 0.01      | 4.4            | 4.5           | -0.01     |
| 65-69                                    | 12.5            | 11.7          | 0.02      | 11.8           | 11.8          | 0.00      |
| 70-74                                    | 18.4            | 17.1          | 0.04      | 18.3           | 18.7          | -0.01     |
| 75-79                                    | 18.8            | 19.5          | -0.02     | 19.3           | 19.4          | 0.00      |
| 80-84                                    | 18.0            | 27.6          | -0.23     | 19.4           | 19.2          | 0.00      |
| 85-89                                    | 22.8            | 14.9          | 0.20      | 22.8           | 22.5          | 0.01      |
| Medical history: General                 |                 |               |           |                |               |           |
| Acute respiratory disease                | 27.8            | 27.0          | 0.02      | 26.8           | 27.1          | -0.01     |
| Attention-deficit/hyperactivity disorder | 0.2             | 0.1           | 0.02      | 0.1            | 0.2           | -0.03     |
| Chronic liver disease                    | 1.4             | 1.9           | -0.04     | 1.8            | 1.7           | 0.01      |
| Chronic obstructive lung disease         | 22.2            | 21.7          | 0.01      | 21.7           | 22.1          | -0.01     |
| Crohn's disease                          | 0.4             | 0.4           | 0.00      | 0.3            | 0.5           | -0.03     |
| Dementia                                 | 7.8             | 6.9           | 0.04      | 7.9            | 7.5           | 0.02      |
| Depressive disorder                      | 19.1            | 16.2          | 0.08      | 18.5           | 18.5          | 0.00      |
| Diabetes mellitus                        | 33.0            | 35.1          | -0.04     | 34.9           | 35.0          | 0.00      |
| Gastroesophageal reflux disease          | 26.4            | 20.5          | 0.14      | 23.9           | 24.8          | -0.02     |
| Gastrointestinal hemorrhage              | 3.3             | 3.8           | -0.03     | 3.6            | 3.7           | 0.00      |
| Human immunodeficiency virus infection   | 0.0             | 0.0           | 0.01      | 0.0            | 0.0           | 0.00      |
| Hyperlipidemia                           | 69.1            | 64.1          | 0.11      | 67.1           | 67.1          | 0.00      |
| Hypertensive disorder                    | 85.5            | 83.6          | 0.05      | 84.3           | 84.9          | -0.02     |
| Lesion of liver                          | 1.2             | 1.2           | 0.00      | 1.4            | 1.1           | 0.03      |
| Obesity                                  | 20.4            | 15.2          | 0.14      | 19.2           | 18.9          | 0.01      |
| Osteoarthritis                           | 37.3            | 30.9          | 0.14      | 34.6           | 35.2          | -0.01     |
| Pneumonia                                | 12.7            | 13.4          | -0.02     | 13.0           | 12.9          | 0.00      |
| Psoriasis                                | 1.2             | 0.8           | 0.04      | 1.2            | 1.0           | 0.02      |
| Renal impairment                         | 28.7            | 29.2          | -0.01     | 30.8           | 30.4          | 0.01      |
| Rheumatoid arthritis                     | 3.1             | 3.2           | 0.00      | 2.9            | 3.1           | -0.01     |
| Schizophrenia                            | 0.3             | 0.2           | 0.02      | 0.2            | 0.2           | 0.00      |
| Ulcerative colitis                       | 0.5             | 0.4           | 0.01      | 0.6            | 0.5           | 0.00      |
| Urinary tract infectious disease         | 20.6            | 21.4          | -0.02     | 20.5           | 20.4          | 0.00      |
| Viral hepatitis C                        | 0.5             | 0.4           | 0.01      | 0.5            | 0.5           | 0.00      |
| Visual system disorder                   | 39.7            | 37.8          | 0.04      | 38.7           | 38.7          | 0.00      |
| Medical history: Cardiovascular disease  |                 |               |           |                |               |           |
| Atrial fibrillation                      | 96.0            | 94.7          | 0.06      | 95.0           | 95.1          | -0.01     |
| Cerebrovascular disease                  | 19.5            | 22.2          | -0.06     | 20.3           | 20.4          | 0.00      |
| Coronary atherosclerosis                 | 30.1            | 32.0          | -0.04     | 31.9           | 31.6          | 0.00      |
| Heart disease                            | 99.3            | 98.7          | 0.07      | 98.7           | 99.0          | -0.03     |
| Heart failure                            | 33.6            | 37.8          | -0.09     | 36.4           | 36.4          | 0.00      |
| Ischemic heart disease                   | 20.5            | 21.4          | -0.02     | 21.9           | 21.5          | 0.01      |

|                                                                                           |      |      |       |      |      |       |
|-------------------------------------------------------------------------------------------|------|------|-------|------|------|-------|
| Peripheral vascular disease                                                               | 10.5 | 10.1 | 0.01  | 10.8 | 10.5 | 0.01  |
| Venous thrombosis                                                                         | 0.9  | 0.9  | 0.00  | 1.0  | 1.0  | 0.00  |
| Medical history: Neoplasms                                                                |      |      |       |      |      |       |
| Hematologic neoplasm                                                                      | 2.0  | 1.9  | 0.01  | 1.9  | 2.0  | 0.00  |
| Malignant lymphoma                                                                        | 1.1  | 0.8  | 0.02  | 1.0  | 0.9  | 0.00  |
| Malignant neoplasm of anorectum                                                           | 0.2  | 0.2  | 0.00  | 0.2  | 0.2  | 0.01  |
| Malignant neoplastic disease                                                              | 13.0 | 12.0 | 0.03  | 12.6 | 12.4 | 0.01  |
| Malignant tumor of breast                                                                 | 4.2  | 3.8  | 0.02  | 4.1  | 4.0  | 0.00  |
| Malignant tumor of colon                                                                  | 0.8  | 0.8  | -0.01 | 0.8  | 0.8  | 0.01  |
| Malignant tumor of lung                                                                   | 1.1  | 0.9  | 0.02  | 1.0  | 1.0  | 0.00  |
| Malignant tumor of urinary bladder                                                        | 0.4  | 0.3  | 0.00  | 0.3  | 0.4  | -0.01 |
| Medication use                                                                            |      |      |       |      |      |       |
| Agents acting on the renin-angiotensin system                                             | 58.0 | 56.1 | 0.04  | 57.3 | 57.6 | -0.01 |
| Antibacterials for systemic use                                                           | 52.0 | 47.9 | 0.08  | 50.0 | 50.5 | -0.01 |
| Antidepressants                                                                           | 30.9 | 27.7 | 0.07  | 30.5 | 30.1 | 0.01  |
| Anti-epileptics                                                                           | 18.9 | 15.7 | 0.08  | 18.6 | 18.9 | -0.01 |
| Anti-inflammatory and antirheumatic products                                              | 18.6 | 15.4 | 0.08  | 16.6 | 16.7 | 0.00  |
| Antineoplastic agents                                                                     | 4.3  | 3.8  | 0.03  | 3.8  | 4.1  | -0.02 |
| Antipsoriatics                                                                            | 1.0  | 1.3  | -0.03 | 1.3  | 1.2  | 0.00  |
| Antithrombotic agents                                                                     | 20.9 | 23.1 | -0.05 | 23.0 | 22.4 | 0.01  |
| Beta-blocking agents                                                                      | 73.6 | 70.9 | 0.06  | 72.9 | 72.8 | 0.00  |
| Calcium channel blockers                                                                  | 47.5 | 44.6 | 0.06  | 46.1 | 46.1 | 0.00  |
| Diuretics                                                                                 | 55.3 | 57.4 | -0.04 | 56.6 | 56.6 | 0.00  |
| Drugs for acid related disorders                                                          | 36.0 | 33.4 | 0.05  | 35.1 | 35.7 | -0.01 |
| Drugs for obstructive airway diseases                                                     | 30.1 | 25.9 | 0.09  | 27.2 | 28.3 | -0.02 |
| Drugs used in diabetes                                                                    | 23.1 | 23.7 | -0.02 | 24.0 | 24.0 | 0.00  |
| Immunosuppressants                                                                        | 3.8  | 3.0  | 0.05  | 3.4  | 3.4  | 0.00  |
| Lipid-modifying agents                                                                    | 58.7 | 56.4 | 0.05  | 58.1 | 58.6 | -0.01 |
| Opioids                                                                                   | 24.2 | 24.1 | 0.00  | 25.1 | 24.9 | 0.00  |
| Psycholeptics                                                                             | 27.2 | 23.8 | 0.08  | 26.8 | 26.9 | 0.00  |
| Psychostimulants, agents used for attention-deficit/hyperactivity disorder and nootropics | 1.0  | 0.7  | 0.03  | 0.9  | 1.0  | -0.01 |

AF, atrial fibrillation; PS, propensity score.

**Online Resource 7.** Baseline characteristics before and after 1:1 PS matching in the AF population in the Optum database: Dabigatran vs Warfarin

| Characteristic                                 | Before matching |               |           | After matching  |               |           |
|------------------------------------------------|-----------------|---------------|-----------|-----------------|---------------|-----------|
|                                                | Dabigatran<br>% | Warfarin<br>% | Std. diff | Dabigatran<br>% | Warfarin<br>% | Std. diff |
| <b>Age group, years</b>                        |                 |               |           |                 |               |           |
| 25-29                                          | <0.1            | 0.0           | 0.00      | <0.1            | 0.0           | 0.00      |
| 30-34                                          | <0.1            | 0.1           | 0.00      | <0.1            | <0.1          | 0.01      |
| 35-39                                          | 0.2             | 0.1           | 0.02      | 0.2             | 0.1           | 0.01      |
| 40-44                                          | 0.3             | 0.2           | 0.02      | 0.3             | 0.3           | 0.01      |
| 45-49                                          | 0.9             | 0.4           | 0.06      | 0.8             | 0.6           | 0.03      |
| 50-54                                          | 2.3             | 1.1           | 0.10      | 2.0             | 1.9           | 0.01      |
| 55-59                                          | 4.7             | 2.5           | 0.12      | 4.0             | 4.2           | -0.01     |
| 60-64                                          | 8.5             | 4.7           | 0.15      | 7.5             | 7.6           | 0.00      |
| 65-69                                          | 14.7            | 11.7          | 0.09      | 14.5            | 14.3          | 0.00      |
| 70-74                                          | 18.6            | 17.1          | 0.04      | 18.8            | 18.2          | 0.01      |
| 75-79                                          | 17.5            | 19.5          | -0.05     | 18.2            | 18.0          | 0.00      |
| 80-84                                          | 23.8            | 27.6          | -0.09     | 24.8            | 26.2          | -0.03     |
| 85-89                                          | 8.4             | 14.9          | -0.20     | 8.9             | 8.6           | 0.01      |
| <b>Medical history: General</b>                |                 |               |           |                 |               |           |
| Acute respiratory disease                      | 23.5            | 27.0          | -0.08     | 23.6            | 23.7          | 0.00      |
| Attention-deficit/hyperactivity disorder       | 0.2             | 0.1           | 0.02      | 0.2             | 0.2           | 0.01      |
| Chronic liver disease                          | 1.7             | 1.9           | -0.01     | 1.7             | 1.6           | 0.01      |
| Chronic obstructive lung disease               | 16.9            | 21.7          | -0.12     | 17.4            | 16.7          | 0.02      |
| Crohn's disease                                | 0.3             | 0.4           | -0.01     | 0.3             | 0.3           | -0.01     |
| Dementia                                       | 4.6             | 6.9           | -0.10     | 4.8             | 4.5           | 0.01      |
| Depressive disorder                            | 13.5            | 16.2          | -0.07     | 13.6            | 13.7          | 0.00      |
| Diabetes mellitus                              | 29.8            | 35.1          | -0.11     | 30.1            | 29.6          | 0.01      |
| Gastroesophageal reflux disease                | 18.4            | 20.5          | -0.05     | 18.5            | 19.0          | -0.01     |
| Gastrointestinal hemorrhage                    | 3.0             | 3.8           | -0.04     | 3.1             | 3.1           | 0.00      |
| Human immunodeficiency virus infection         | <0.1            | 0.0           | 0.00      | <0.1            | <0.1          | 0.00      |
| Hyperlipidemia                                 | 66.0            | 64.1          | 0.04      | 65.8            | 66.3          | -0.01     |
| Hypertensive disorder                          | 82.7            | 83.6          | -0.02     | 83.0            | 82.9          | 0.00      |
| Lesion of liver                                | 1.0             | 1.2           | -0.02     | 1.0             | 0.7           | 0.04      |
| Obesity                                        | 14.4            | 15.2          | -0.02     | 14.3            | 14.1          | 0.00      |
| Osteoarthritis                                 | 28.5            | 30.9          | -0.05     | 28.7            | 29.3          | -0.01     |
| Pneumonia                                      | 9.1             | 13.4          | -0.14     | 9.3             | 9.2           | 0.00      |
| Psoriasis                                      | 0.9             | 0.8           | 0.01      | 1.0             | 0.8           | 0.02      |
| Renal impairment                               | 17.0            | 29.2          | -0.29     | 17.8            | 15.9          | 0.05      |
| Rheumatoid arthritis                           | 3.0             | 3.2           | -0.01     | 3.1             | 3.0           | 0.00      |
| Schizophrenia                                  | 0.2             | 0.2           | 0.00      | 0.2             | 0.3           | 0.00      |
| Ulcerative colitis                             | 0.4             | 0.4           | 0.00      | 0.4             | 0.5           | -0.01     |
| Urinary tract infectious disease               | 16.5            | 21.4          | -0.13     | 16.8            | 16.8          | 0.00      |
| Viral hepatitis C                              | 0.3             | 0.4           | -0.03     | 0.3             | 0.3           | 0.00      |
| Visual system disorder                         | 37.4            | 37.8          | -0.01     | 37.6            | 37.6          | 0.00      |
| <b>Medical history: Cardiovascular disease</b> |                 |               |           |                 |               |           |
| Atrial fibrillation                            | 96.0            | 94.7          | 0.06      | 95.9            | 95.4          | 0.03      |
| Cerebrovascular disease                        | 18.8            | 22.2          | -0.08     | 19.2            | 18.6          | 0.02      |
| Coronary arteriosclerosis                      | 26.1            | 32.0          | -0.13     | 26.6            | 26.4          | 0.00      |
| Heart disease                                  | 98.9            | 98.7          | 0.03      | 98.9            | 99.0          | -0.01     |
| Heart failure                                  | 25.5            | 37.8          | -0.27     | 26.3            | 25.8          | 0.01      |
| Ischemic heart disease                         | 16.3            | 21.4          | -0.13     | 16.6            | 16.7          | 0.00      |
| Peripheral vascular disease                    | 6.8             | 10.1          | -0.12     | 7.0             | 6.7           | 0.01      |
| Venous thrombosis                              | 0.8             | 0.9           | -0.01     | 0.8             | 0.8           | 0.00      |
| <b>Medical history: Neoplasms</b>              |                 |               |           |                 |               |           |
| Hematologic neoplasm                           | 1.3             | 1.9           | -0.04     | 1.4             | 1.4           | 0.00      |
| Malignant lymphoma                             | 0.6             | 0.8           | -0.03     | 0.6             | 0.6           | 0.00      |
| Malignant neoplasm of anorectum                | 0.2             | 0.2           | -0.01     | 0.2             | 0.2           | 0.01      |
| Malignant neoplastic disease                   | 11.6            | 12.0          | -0.02     | 11.6            | 11.1          | 0.02      |
| Malignant tumor of breast                      | 4.1             | 3.8           | 0.02      | 4.1             | 3.8           | 0.02      |
| Malignant tumor of colon                       | 0.6             | 0.8           | -0.03     | 0.6             | 0.8           | -0.02     |
| Malignant tumor of lung                        | 0.7             | 0.9           | -0.02     | 0.7             | 0.8           | 0.00      |
| Malignant tumor of urinary bladder             | 0.2             | 0.3           | -0.03     | 0.2             | 0.3           | -0.02     |
| <b>Medication use</b>                          |                 |               |           |                 |               |           |
| Agents acting on the renin-angiotensin system  | 55.6            | 56.1          | -0.01     | 56.1            | 55.8          | 0.01      |
| Antibacterials for systemic use                | 48.1            | 47.9          | 0.00      | 48.1            | 49.7          | -0.03     |

|                                                                                           |      |      |       |      |      |       |
|-------------------------------------------------------------------------------------------|------|------|-------|------|------|-------|
| Antidepressants                                                                           | 26.7 | 27.7 | -0.02 | 26.6 | 26.2 | 0.01  |
| Anti-epileptics                                                                           | 13.4 | 15.7 | -0.06 | 13.5 | 13.6 | 0.00  |
| Anti-inflammatory and antirheumatic products                                              | 18.1 | 15.4 | 0.07  | 18.0 | 17.8 | 0.00  |
| Antineoplastic agents                                                                     | 3.6  | 3.8  | -0.01 | 3.6  | 3.5  | 0.01  |
| Antipsoriatics                                                                            | 0.6  | 1.3  | -0.07 | 0.6  | 0.5  | 0.02  |
| Antithrombotic agents                                                                     | 15.8 | 23.1 | -0.19 | 16.1 | 15.9 | 0.00  |
| Beta-blocking agents                                                                      | 70.8 | 70.9 | 0.00  | 71.1 | 70.4 | 0.02  |
| Calcium channel blockers                                                                  | 45.7 | 44.6 | 0.02  | 45.7 | 46.1 | -0.01 |
| Diuretics                                                                                 | 52.3 | 57.4 | -0.10 | 52.9 | 52.6 | 0.01  |
| Drugs for acid related disorders                                                          | 30.3 | 33.4 | -0.07 | 30.6 | 30.4 | 0.00  |
| Drugs for obstructive airway diseases                                                     | 25.8 | 25.9 | 0.00  | 25.6 | 25.7 | 0.00  |
| Drugs used in diabetes                                                                    | 20.2 | 23.7 | -0.08 | 20.4 | 19.9 | 0.01  |
| Immunosuppressants                                                                        | 3.2  | 3.0  | 0.01  | 3.1  | 3.0  | 0.00  |
| Lipid-modifying agents                                                                    | 53.2 | 56.4 | -0.06 | 53.6 | 53.7 | 0.00  |
| Opioids                                                                                   | 20.4 | 24.1 | -0.09 | 20.7 | 20.4 | 0.01  |
| Psycholeptics                                                                             | 23.4 | 23.8 | -0.01 | 23.0 | 22.9 | 0.00  |
| Psychostimulants, agents used for attention-deficit/hyperactivity disorder and nootropics | 0.9  | 0.7  | 0.02  | 0.8  | 0.9  | -0.01 |

AF, atrial fibrillation; PS, propensity score.



**Online Resource 8.** Baseline characteristics before and after 1:1 PS matching in the AF population in the Optum database: Rivaroxaban vs Apixaban

| Characteristic                                 | Before matching  |               |           | After matching   |               |           |
|------------------------------------------------|------------------|---------------|-----------|------------------|---------------|-----------|
|                                                | Rivaroxaban<br>% | Apixaban<br>% | Std. diff | Rivaroxaban<br>% | Apixaban<br>% | Std. diff |
| <b>Age group, years</b>                        |                  |               |           |                  |               |           |
| 20-24                                          | 0.0              | 0.0           | 0.00      | 0.0              | 0.0           | -0.01     |
| 25-29                                          | 0.0              | 0.0           | 0.02      | 0.0              | 0.0           | 0.01      |
| 30-34                                          | 0.1              | 0.0           | 0.02      | 0.1              | 0.0           | 0.02      |
| 35-39                                          | 0.2              | 0.1           | 0.03      | 0.1              | 0.1           | 0.02      |
| 40-44                                          | 0.4              | 0.2           | 0.02      | 0.4              | 0.3           | 0.02      |
| 45-49                                          | 0.8              | 0.5           | 0.04      | 0.7              | 0.6           | 0.02      |
| 50-54                                          | 1.9              | 1.1           | 0.06      | 1.7              | 1.5           | 0.01      |
| 55-59                                          | 3.9              | 2.6           | 0.07      | 3.6              | 3.6           | 0.00      |
| 60-64                                          | 6.6              | 4.9           | 0.07      | 6.3              | 6.3           | 0.00      |
| 65-69                                          | 14.8             | 12.5          | 0.07      | 14.5             | 14.5          | 0.00      |
| 70-74                                          | 18.8             | 18.4          | 0.01      | 18.9             | 18.5          | 0.01      |
| 75-79                                          | 18.7             | 18.8          | 0.00      | 19.1             | 19.0          | 0.00      |
| 80-84                                          | 18.2             | 18.0          | 0.01      | 16.7             | 16.2          | 0.01      |
| 85-89                                          | 15.7             | 22.8          | -0.18     | 17.9             | 19.3          | -0.04     |
| <b>Medical history: General</b>                |                  |               |           |                  |               |           |
| Acute respiratory disease                      | 24.5             | 27.8          | -0.07     | 24.9             | 25.1          | 0.00      |
| Attention-deficit/hyperactivity disorder       | 0.2              | 0.2           | 0.00      | 0.2              | 0.2           | -0.01     |
| Chronic liver disease                          | 1.5              | 1.4           | 0.01      | 1.4              | 1.3           | 0.01      |
| Chronic obstructive lung disease               | 18.7             | 22.2          | -0.08     | 19.6             | 19.4          | 0.00      |
| Crohn's disease                                | 0.3              | 0.4           | -0.02     | 0.3              | 0.4           | -0.02     |
| Dementia                                       | 6.1              | 7.8           | -0.07     | 6.5              | 6.3           | 0.00      |
| Depressive disorder                            | 16.2             | 19.1          | -0.07     | 17.3             | 16.9          | 0.01      |
| Diabetes mellitus                              | 30.4             | 33.0          | -0.06     | 30.9             | 30.7          | 0.00      |
| Gastroesophageal reflux disease                | 22.0             | 26.4          | -0.10     | 23.2             | 22.7          | 0.01      |
| Gastrointestinal hemorrhage                    | 2.5              | 3.3           | -0.05     | 2.7              | 2.6           | 0.01      |
| Human immunodeficiency virus infection         | 0.1              | 0.0           | 0.01      | 0.1              | 0.0           | 0.02      |
| Hyperlipidemia                                 | 64.2             | 69.1          | -0.10     | 64.6             | 64.2          | 0.01      |
| Hypertensive disorder                          | 82.0             | 85.5          | -0.10     | 82.3             | 82.2          | 0.00      |
| Lesion of liver                                | 1.0              | 1.2           | -0.02     | 1.0              | 1.0           | 0.01      |
| Obesity                                        | 18.5             | 20.4          | -0.05     | 19.7             | 19.3          | 0.01      |
| Osteoarthritis                                 | 32.7             | 37.3          | -0.10     | 33.6             | 33.1          | 0.01      |
| Pneumonia                                      | 10.3             | 12.7          | -0.07     | 10.5             | 10.4          | 0.00      |
| Psoriasis                                      | 1.2              | 1.2           | -0.01     | 1.2              | 1.2           | 0.00      |
| Renal impairment                               | 20.9             | 28.7          | -0.18     | 22.3             | 22.1          | 0.01      |
| Rheumatoid arthritis                           | 2.9              | 3.1           | -0.01     | 3.0              | 2.9           | 0.00      |
| Schizophrenia                                  | 0.2              | 0.3           | -0.01     | 0.3              | 0.2           | 0.01      |
| Ulcerative colitis                             | 0.4              | 0.5           | -0.01     | 0.5              | 0.5           | 0.00      |
| Urinary tract infectious disease               | 17.4             | 20.6          | -0.08     | 17.7             | 17.4          | 0.01      |
| Viral hepatitis C                              | 0.4              | 0.5           | -0.01     | 0.5              | 0.5           | 0.00      |
| Visual system disorder                         | 37.6             | 39.7          | -0.04     | 38.4             | 37.7          | 0.01      |
| <b>Medical history: Cardiovascular disease</b> |                  |               |           |                  |               |           |
| Atrial fibrillation                            | 94.5             | 96.0          | -0.07     | 94.7             | 94.9          | -0.01     |
| Cerebrovascular disease                        | 15.3             | 19.5          | -0.11     | 15.6             | 15.3          | 0.01      |
| Coronary atherosclerosis                       | 24.6             | 30.1          | -0.12     | 24.8             | 24.3          | 0.01      |
| Heart disease                                  | 98.4             | 99.3          | -0.08     | 98.5             | 98.6          | -0.01     |
| Heart failure                                  | 27.6             | 33.6          | -0.13     | 28.2             | 27.9          | 0.01      |
| Ischemic heart disease                         | 16.5             | 20.5          | -0.10     | 16.7             | 16.6          | 0.00      |
| Peripheral vascular disease                    | 8.3              | 10.5          | -0.08     | 8.7              | 8.7           | 0.00      |
| Venous thrombosis                              | 0.7              | 0.9           | -0.02     | 0.8              | 0.7           | 0.00      |
| <b>Medical history: Neoplasms</b>              |                  |               |           |                  |               |           |
| Hematologic neoplasm                           | 1.6              | 2.0           | -0.03     | 1.7              | 1.7           | 0.00      |
| Malignant lymphoma                             | 0.9              | 1.1           | -0.02     | 0.9              | 0.8           | 0.01      |
| Malignant neoplasm of anorectum                | 0.2              | 0.2           | -0.01     | 0.2              | 0.2           | 0.00      |
| Malignant neoplastic disease                   | 11.7             | 13.0          | -0.04     | 11.9             | 11.8          | 0.00      |
| Malignant tumor of breast                      | 4.0              | 4.2           | -0.01     | 3.9              | 3.9           | 0.00      |
| Malignant tumor of colon                       | 0.6              | 0.8           | -0.02     | 0.7              | 0.6           | 0.01      |
| Malignant tumor of lung                        | 0.8              | 1.1           | -0.03     | 0.9              | 0.9           | 0.00      |
| Malignant tumor of urinary bladder             | 0.3              | 0.4           | -0.01     | 0.3              | 0.3           | 0.00      |
| <b>Medication use</b>                          |                  |               |           |                  |               |           |
| Agents acting on the renin-angiotensin system  | 55.5             | 58.0          | -0.05     | 55.6             | 55.2          | 0.01      |

|                                                                                           |      |      |       |      |      |       |
|-------------------------------------------------------------------------------------------|------|------|-------|------|------|-------|
| Antibacterials for systemic use                                                           | 48.9 | 52.0 | -0.06 | 49.2 | 48.6 | 0.01  |
| Antidepressants                                                                           | 28.2 | 30.9 | -0.06 | 29.1 | 28.5 | 0.01  |
| Anti-epileptics                                                                           | 16.2 | 18.9 | -0.07 | 17.1 | 16.6 | 0.01  |
| Anti-inflammatory and antirheumatic products                                              | 18.8 | 18.6 | 0.00  | 18.7 | 18.6 | 0.00  |
| Antineoplastic agents                                                                     | 3.9  | 4.3  | -0.02 | 4.0  | 3.8  | 0.01  |
| Antipsoriatics                                                                            | 0.6  | 1.0  | -0.04 | 0.7  | 0.7  | 0.00  |
| Antithrombotic agents                                                                     | 17.2 | 20.9 | -0.09 | 17.9 | 17.6 | 0.01  |
| Beta-blocking agents                                                                      | 70.6 | 73.6 | -0.07 | 71.1 | 71.1 | 0.00  |
| Calcium channel blockers                                                                  | 44.6 | 47.5 | -0.06 | 44.7 | 44.7 | 0.00  |
| Diuretics                                                                                 | 51.6 | 55.3 | -0.07 | 51.9 | 52.5 | -0.01 |
| Drugs for acid related disorders                                                          | 32.8 | 36.0 | -0.07 | 33.3 | 32.6 | 0.01  |
| Drugs for obstructive airway diseases                                                     | 28.7 | 30.1 | -0.03 | 29.4 | 29.2 | 0.00  |
| Drugs used in diabetes                                                                    | 20.8 | 23.1 | -0.05 | 21.4 | 21.5 | 0.00  |
| Immunosuppressants                                                                        | 3.6  | 3.8  | -0.01 | 3.6  | 3.7  | -0.01 |
| Lipid-modifying agents                                                                    | 53.9 | 58.7 | -0.10 | 54.8 | 54.3 | 0.01  |
| Opioids                                                                                   | 22.1 | 24.2 | -0.05 | 22.7 | 22.3 | 0.01  |
| Psycholeptics                                                                             | 26.1 | 27.2 | -0.02 | 26.4 | 26.0 | 0.01  |
| Psychostimulants, agents used for attention-deficit/hyperactivity disorder and nootropics | 1.0  | 1.0  | 0.00  | 1.0  | 1.2  | -0.02 |

AF, atrial fibrillation; PS, propensity score.

**Online Resource 9.** Baseline characteristics before and after 1:1 PS matching in the AF population in the Optum database: Rivaroxaban vs Dabigatran

| Characteristic                                | Before matching  |                 |           | After matching   |                 |           |
|-----------------------------------------------|------------------|-----------------|-----------|------------------|-----------------|-----------|
|                                               | Rivaroxaban<br>% | Dabigatran<br>% | Std. diff | Rivaroxaban<br>% | Dabigatran<br>% | Std. diff |
| Age group, years                              |                  |                 |           |                  |                 |           |
| 25-29                                         | 0.0              | <0.1            | 0.02      | <0.1             | <0.1            | 0.00      |
| 30-34                                         | 0.1              | <0.1            | 0.02      | 0.1              | <0.1            | 0.03      |
| 35-39                                         | 0.2              | 0.2             | 0.00      | 0.1              | 0.2             | -0.02     |
| 40-44                                         | 0.4              | 0.3             | 0.01      | 0.4              | 0.2             | 0.03      |
| 45-49                                         | 0.8              | 0.9             | -0.01     | 0.9              | 0.8             | 0.01      |
| 50-54                                         | 1.9              | 2.3             | -0.03     | 1.9              | 1.8             | 0.01      |
| 55-59                                         | 3.9              | 4.7             | -0.04     | 4.7              | 4.4             | 0.01      |
| 60-64                                         | 6.6              | 8.5             | -0.07     | 7.5              | 7.6             | 0.00      |
| 65-69                                         | 14.8             | 14.7            | 0.00      | 15.9             | 15.3            | 0.02      |
| 70-74                                         | 18.8             | 18.6            | 0.00      | 18.3             | 19.1            | -0.02     |
| 75-79                                         | 18.7             | 17.5            | 0.03      | 17.8             | 18.4            | -0.02     |
| 80-84                                         | 18.2             | 23.8            | -0.14     | 22.0             | 20.9            | 0.03      |
| 85-89                                         | 15.7             | 8.4             | 0.22      | 10.3             | 11.2            | -0.03     |
| Medical history: General                      |                  |                 |           |                  |                 |           |
| Acute respiratory disease                     | 24.5             | 23.5            | 0.02      | 24.0             | 23.9            | 0.00      |
| Attention-deficit/hyperactivity disorder      | 0.2              | 0.2             | -0.01     | 0.1              | 0.3             | -0.03     |
| Chronic liver disease                         | 1.5              | 1.7             | -0.02     | 1.5              | 1.8             | -0.02     |
| Chronic obstructive lung disease              | 18.7             | 16.9            | 0.05      | 17.0             | 17.7            | -0.02     |
| Crohn's disease                               | 0.3              | 0.3             | 0.00      | 0.3              | 0.3             | 0.01      |
| Dementia                                      | 6.1              | 4.6             | 0.07      | 5.1              | 5.1             | 0.00      |
| Depressive disorder                           | 16.2             | 13.5            | 0.08      | 14.8             | 14.4            | 0.01      |
| Diabetes mellitus                             | 30.4             | 29.8            | 0.01      | 30.3             | 30.2            | 0.00      |
| Gastroesophageal reflux disease               | 22.0             | 18.4            | 0.09      | 20.4             | 19.6            | 0.02      |
| Gastrointestinal hemorrhage                   | 2.5              | 3.0             | -0.03     | 2.8              | 3.0             | -0.02     |
| Human immunodeficiency virus infection        | 0.1              | <0.1            | 0.02      | <0.1             | <0.1            | 0.00      |
| Hyperlipidemia                                | 64.2             | 66.0            | -0.04     | 66.3             | 65.7            | 0.01      |
| Hypertensive disorder                         | 82.0             | 82.7            | -0.02     | 82.3             | 82.3            | 0.00      |
| Lesion of liver                               | 1.0              | 1.0             | 0.00      | 0.9              | 1.2             | -0.03     |
| Obesity                                       | 18.5             | 14.4            | 0.11      | 16.6             | 15.8            | 0.02      |
| Osteoarthritis                                | 32.7             | 28.5            | 0.09      | 30.2             | 29.7            | 0.01      |
| Pneumonia                                     | 10.3             | 9.1             | 0.04      | 9.9              | 9.4             | 0.01      |
| Psoriasis                                     | 1.2              | 0.9             | 0.02      | 1.2              | 1.0             | 0.02      |
| Renal impairment                              | 20.9             | 17.0            | 0.10      | 18.2             | 18.4            | 0.00      |
| Rheumatoid arthritis                          | 2.9              | 3.0             | -0.01     | 3.5              | 3.0             | 0.03      |
| Schizophrenia                                 | 0.2              | 0.2             | 0.00      | 0.3              | 0.3             | 0.00      |
| Ulcerative colitis                            | 0.4              | 0.4             | 0.00      | 0.4              | 0.4             | 0.01      |
| Urinary tract infectious disease              | 17.4             | 16.5            | 0.02      | 17.9             | 16.7            | 0.03      |
| Viral hepatitis C                             | 0.4              | 0.3             | 0.03      | 0.3              | 0.3             | 0.00      |
| Visual system disorder                        | 37.6             | 37.4            | 0.00      | 37.1             | 37.6            | -0.01     |
| Medical history: Cardiovascular disease       |                  |                 |           |                  |                 |           |
| Atrial fibrillation                           | 94.5             | 96.0            | -0.07     | 95.1             | 95.4            | -0.02     |
| Cerebrovascular disease                       | 15.3             | 18.8            | -0.09     | 19.0             | 18.0            | 0.03      |
| Coronary arteriosclerosis                     | 24.6             | 26.1            | -0.04     | 26.1             | 25.7            | 0.01      |
| Heart disease                                 | 98.4             | 98.9            | -0.04     | 98.7             | 98.5            | 0.02      |
| Heart failure                                 | 27.6             | 25.5            | 0.05      | 26.4             | 26.0            | 0.01      |
| Ischemic heart disease                        | 16.5             | 16.3            | 0.00      | 16.8             | 16.2            | 0.02      |
| Peripheral vascular disease                   | 8.3              | 6.8             | 0.06      | 7.2              | 6.9             | 0.01      |
| Venous thrombosis                             | 0.7              | 0.8             | 0.00      | 0.9              | 0.7             | 0.02      |
| Medical history: Neoplasms                    |                  |                 |           |                  |                 |           |
| Hematologic neoplasm                          | 1.6              | 1.3             | 0.02      | 1.4              | 1.5             | 0.00      |
| Malignant lymphoma                            | 0.9              | 0.6             | 0.04      | 0.7              | 0.6             | 0.00      |
| Malignant neoplasm of anorectum               | 0.2              | 0.2             | 0.00      | 0.3              | 0.3             | 0.02      |
| Malignant neoplastic disease                  | 11.7             | 11.6            | 0.00      | 11.2             | 11.7            | -0.02     |
| Malignant tumor of breast                     | 4.0              | 4.1             | -0.01     | 3.9              | 4.1             | -0.01     |
| Malignant tumor of colon                      | 0.6              | 0.6             | 0.00      | 0.7              | 0.7             | 0.00      |
| Malignant tumor of lung                       | 0.8              | 0.7             | 0.02      | 0.6              | 0.6             | 0.00      |
| Malignant tumor of urinary bladder            | 0.3              | 0.2             | 0.02      | 0.3              | 0.2             | 0.01      |
| Medication use                                |                  |                 |           |                  |                 |           |
| Agents acting on the renin-angiotensin system | 55.5             | 55.6            | 0.00      | 55.3             | 55.6            | -0.01     |
| Antibacterials for systemic use               | 48.9             | 48.1            | 0.02      | 48.7             | 48.0            | 0.01      |

|                                                                                           |      |      |       |      |      |       |
|-------------------------------------------------------------------------------------------|------|------|-------|------|------|-------|
| Antidepressants                                                                           | 28.2 | 26.7 | 0.03  | 27.1 | 27.5 | -0.01 |
| Anti-epileptics                                                                           | 16.2 | 13.4 | 0.08  | 14.0 | 14.9 | -0.02 |
| Anti-inflammatory and antirheumatic products                                              | 18.8 | 18.1 | 0.02  | 17.9 | 18.0 | 0.00  |
| Antineoplastic agents                                                                     | 3.9  | 3.6  | 0.02  | 3.8  | 3.8  | 0.00  |
| Antipsoriatics                                                                            | 0.6  | 0.6  | 0.00  | 0.5  | 0.7  | -0.02 |
| Antithrombotic agents                                                                     | 17.2 | 15.8 | 0.04  | 15.5 | 15.7 | 0.00  |
| Beta-blocking agents                                                                      | 70.6 | 70.8 | 0.00  | 70.3 | 70.2 | 0.00  |
| Calcium channel blockers                                                                  | 44.6 | 45.7 | -0.02 | 44.1 | 45.7 | -0.03 |
| Diuretics                                                                                 | 51.6 | 52.3 | -0.01 | 50.8 | 51.8 | -0.02 |
| Drugs for acid related disorders                                                          | 32.8 | 30.3 | 0.05  | 31.9 | 31.6 | 0.01  |
| Drugs for obstructive airway diseases                                                     | 28.7 | 25.8 | 0.07  | 26.8 | 26.9 | 0.00  |
| Drugs used in diabetes                                                                    | 20.8 | 20.2 | 0.02  | 19.7 | 20.2 | -0.01 |
| Immunosuppressants                                                                        | 3.6  | 3.2  | 0.02  | 3.5  | 3.1  | 0.02  |
| Lipid-modifying agents                                                                    | 53.9 | 53.2 | 0.02  | 53.7 | 53.3 | 0.01  |
| Opioids                                                                                   | 22.1 | 20.4 | 0.04  | 20.2 | 21.3 | -0.03 |
| Psycholeptics                                                                             | 26.1 | 23.4 | 0.06  | 25.2 | 25.2 | 0.00  |
| Psychostimulants, agents used for attention-deficit/hyperactivity disorder and nootropics | 1.0  | 0.9  | 0.01  | 1.0  | 1.0  | 0.00  |

AF, atrial fibrillation; PS, propensity score.

**Online Resource 10.** Baseline characteristics before and after 1:1 PS matching in the AF population in the Optum database: Apixaban vs Dabigatran

| Characteristic                                | Before matching |                 |           | After matching |                 |           |
|-----------------------------------------------|-----------------|-----------------|-----------|----------------|-----------------|-----------|
|                                               | Apixaban<br>%   | Dabigatran<br>% | Std. diff | Apixaban<br>%  | Dabigatran<br>% | Std. diff |
| Age group, years                              |                 |                 |           |                |                 |           |
| 25-29                                         | 0.0             | <0.1            | 0.00      | 0.0            | <0.2            | 0.00      |
| 30-34                                         | 0.0             | <0.1            | 0.00      | <0.2           | <0.2            | 0.00      |
| 35-39                                         | 0.1             | 0.2             | -0.03     | <0.2           | <0.2            | -0.01     |
| 40-44                                         | 0.2             | 0.3             | -0.02     | 0.4            | 0.2             | 0.03      |
| 45-49                                         | 0.5             | 0.9             | -0.05     | 0.6            | 0.9             | -0.04     |
| 50-54                                         | 1.1             | 2.3             | -0.09     | 1.6            | 1.8             | -0.02     |
| 55-59                                         | 2.6             | 4.7             | -0.11     | 3.7            | 4.0             | -0.01     |
| 60-64                                         | 4.9             | 8.5             | -0.14     | 7.3            | 7.1             | 0.01      |
| 65-69                                         | 12.5            | 14.7            | -0.06     | 14.9           | 15.2            | -0.01     |
| 70-74                                         | 18.4            | 18.6            | 0.00      | 18.0           | 19.2            | -0.03     |
| 75-79                                         | 18.8            | 17.5            | 0.03      | 18.7           | 19.0            | -0.01     |
| 80-84                                         | 18.0            | 23.8            | -0.14     | 17.8           | 17.8            | 0.00      |
| 85-89                                         | 22.8            | 8.4             | 0.40      | 16.9           | 14.6            | 0.06      |
| Medical history: General                      |                 |                 |           |                |                 |           |
| Acute respiratory disease                     | 27.8            | 23.5            | 0.10      | 24.9           | 24.3            | 0.01      |
| Attention-deficit/hyperactivity disorder      | 0.2             | 0.2             | -0.01     | <0.2           | 0.4             | -0.05     |
| Chronic liver disease                         | 1.4             | 1.7             | -0.03     | 1.2            | 2.0             | -0.06     |
| Chronic obstructive lung disease              | 22.2            | 16.9            | 0.13      | 17.4           | 18.8            | -0.04     |
| Crohn's disease                               | 0.4             | 0.3             | 0.02      | 0.3            | 0.2             | 0.02      |
| Dementia                                      | 7.8             | 4.6             | 0.13      | 6.2            | 5.8             | 0.02      |
| Depressive disorder                           | 19.1            | 13.5            | 0.15      | 15.9           | 16.2            | -0.01     |
| Diabetes mellitus                             | 33.0            | 29.8            | 0.07      | 30.6           | 31.3            | -0.02     |
| Gastroesophageal reflux disease               | 26.4            | 18.4            | 0.19      | 19.9           | 20.9            | -0.02     |
| Gastrointestinal hemorrhage                   | 3.3             | 3.0             | 0.02      | 2.8            | 3.6             | -0.05     |
| Human immunodeficiency virus infection        | 0.0             | <0.1            | 0.01      | 0.0            | <0.2            | 0.00      |
| Hyperlipidemia                                | 69.1            | 66.0            | 0.07      | 66.2           | 66.7            | -0.01     |
| Hypertensive disorder                         | 85.5            | 82.7            | 0.08      | 83.5           | 82.9            | 0.02      |
| Lesion of liver                               | 1.2             | 1.0             | 0.02      | 0.9            | 1.4             | -0.05     |
| Obesity                                       | 20.4            | 14.4            | 0.16      | 16.9           | 17.6            | -0.02     |
| Osteoarthritis                                | 37.3            | 28.5            | 0.19      | 30.5           | 31.1            | -0.01     |
| Pneumonia                                     | 12.7            | 9.1             | 0.11      | 9.3            | 9.7             | -0.02     |
| Psoriasis                                     | 1.2             | 0.9             | 0.03      | 1.2            | 0.9             | 0.04      |
| Renal impairment                              | 28.7            | 17.0            | 0.28      | 18.4           | 20.1            | -0.04     |
| Rheumatoid arthritis                          | 3.1             | 3.0             | 0.01      | 3.1            | 3.2             | -0.01     |
| Schizophrenia                                 | 0.3             | 0.2             | 0.01      | <0.2           | 0.3             | -0.03     |
| Ulcerative colitis                            | 0.5             | 0.4             | 0.01      | 0.5            | 0.5             | 0.00      |
| Urinary tract infectious disease              | 20.6            | 16.5            | 0.11      | 17.3           | 17.3            | 0.00      |
| Viral hepatitis C                             | 0.5             | 0.3             | 0.04      | 0.3            | 0.4             | -0.02     |
| Visual system disorder                        | 39.7            | 37.4            | 0.05      | 36.4           | 38.3            | -0.04     |
| Medical history: Cardiovascular disease       |                 |                 |           |                |                 |           |
| Atrial fibrillation                           | 96.0            | 96.0            | 0.00      | 95.5           | 95.1            | 0.02      |
| Cerebrovascular disease                       | 19.5            | 18.8            | 0.02      | 18.3           | 19.5            | -0.03     |
| Coronary arteriosclerosis                     | 30.1            | 26.1            | 0.09      | 26.2           | 26.9            | -0.02     |
| Heart disease                                 | 99.3            | 98.9            | 0.04      | 98.4           | 98.4            | 0.00      |
| Heart failure                                 | 33.6            | 25.5            | 0.18      | 26.2           | 26.9            | -0.02     |
| Ischemic heart disease                        | 20.5            | 16.3            | 0.11      | 16.0           | 16.9            | -0.02     |
| Peripheral vascular disease                   | 10.5            | 6.8             | 0.13      | 7.2            | 7.3             | 0.00      |
| Venous thrombosis                             | 0.9             | 0.8             | 0.01      | 0.9            | 0.7             | 0.01      |
| Medical history: Neoplasms                    |                 |                 |           |                |                 |           |
| Hematologic neoplasm                          | 2.0             | 1.3             | 0.05      | 1.7            | 1.6             | 0.00      |
| Malignant lymphoma                            | 1.1             | 0.6             | 0.06      | 0.9            | 0.6             | 0.03      |
| Malignant neoplasm of anorectum               | 0.2             | 0.2             | 0.00      | 0.3            | 0.2             | 0.03      |
| Malignant neoplastic disease                  | 13.0            | 11.6            | 0.04      | 11.5           | 11.5            | 0.00      |
| Malignant tumor of breast                     | 4.2             | 4.1             | 0.00      | 4.2            | 4.1             | 0.01      |
| Malignant tumor of colon                      | 0.8             | 0.6             | 0.02      | 0.7            | 0.7             | 0.00      |
| Malignant tumor of lung                       | 1.1             | 0.7             | 0.05      | 0.7            | 0.7             | -0.01     |
| Malignant tumor of urinary bladder            | 0.4             | 0.2             | 0.03      | 0.4            | 0.3             | 0.03      |
| Medication use                                |                 |                 |           |                |                 |           |
| Agents acting on the renin-angiotensin system | 58.0            | 55.6            | 0.05      | 55.5           | 55.1            | 0.01      |
| Antibacterials for systemic use               | 52.0            | 48.1            | 0.08      | 47.6           | 49.3            | -0.03     |

|                                                                                           |      |      |      |      |      |       |
|-------------------------------------------------------------------------------------------|------|------|------|------|------|-------|
| Antidepressants                                                                           | 30.9 | 26.7 | 0.09 | 29.0 | 28.7 | 0.01  |
| Anti-epileptics                                                                           | 18.9 | 13.4 | 0.15 | 16.5 | 16.7 | -0.01 |
| Anti-inflammatory and antirheumatic products                                              | 18.6 | 18.1 | 0.01 | 17.7 | 17.9 | -0.01 |
| Antineoplastic agents                                                                     | 4.3  | 3.6  | 0.04 | 3.8  | 3.5  | 0.02  |
| Antipsoriatics                                                                            | 1.0  | 0.6  | 0.04 | 0.6  | 0.6  | 0.00  |
| Antithrombotic agents                                                                     | 20.9 | 15.8 | 0.13 | 15.9 | 16.8 | -0.02 |
| Beta-blocking agents                                                                      | 73.6 | 70.8 | 0.06 | 69.5 | 71.1 | -0.03 |
| Calcium channel blockers                                                                  | 47.5 | 45.7 | 0.04 | 44.1 | 44.0 | 0.00  |
| Diuretics                                                                                 | 55.3 | 52.3 | 0.06 | 50.3 | 52.0 | -0.04 |
| Drugs for acid related disorders                                                          | 36.0 | 30.3 | 0.12 | 32.3 | 32.7 | -0.01 |
| Drugs for obstructive airway diseases                                                     | 30.1 | 25.8 | 0.10 | 26.7 | 27.3 | -0.02 |
| Drugs used in diabetes                                                                    | 23.1 | 20.2 | 0.07 | 21.0 | 21.0 | 0.00  |
| Immunosuppressants                                                                        | 3.8  | 3.2  | 0.04 | 3.8  | 3.3  | 0.02  |
| Lipid-modifying agents                                                                    | 58.7 | 53.2 | 0.11 | 53.0 | 54.4 | -0.03 |
| Opioids                                                                                   | 24.2 | 20.4 | 0.09 | 21.3 | 22.7 | -0.03 |
| Psycholeptics                                                                             | 27.2 | 23.4 | 0.09 | 26.1 | 26.7 | -0.01 |
| Psychostimulants, agents used for attention-deficit/hyperactivity disorder and nootropics | 1.0  | 0.9  | 0.01 | 1.3  | 1.1  | 0.02  |

AF, atrial fibrillation; PS, propensity score.

**Online Resource 11.** Baseline characteristics before and after 1:1 PS matching in the VTE population in the Optum database: Apixaban vs Warfarin

| Characteristic                                 | Before matching |               |           | After matching |               |           |
|------------------------------------------------|-----------------|---------------|-----------|----------------|---------------|-----------|
|                                                | Apixaban<br>%   | Warfarin<br>% | Std. diff | Apixaban<br>%  | Warfarin<br>% | Std. diff |
| <b>Age group, years</b>                        |                 |               |           |                |               |           |
| 20-24                                          | 0.2             | 0.5           | -0.05     | 0.3            | 0.4           | -0.01     |
| 25-29                                          | 0.5             | 0.9           | -0.05     | 0.6            | 0.5           | 0.01      |
| 30-34                                          | 0.8             | 1.3           | -0.05     | 1.0            | 0.8           | 0.02      |
| 35-39                                          | 1.3             | 2.0           | -0.05     | 1.5            | 1.3           | 0.01      |
| 40-44                                          | 2.0             | 2.9           | -0.05     | 2.3            | 1.6           | 0.04      |
| 45-49                                          | 2.9             | 4.1           | -0.06     | 3.0            | 3.3           | -0.02     |
| 50-54                                          | 4.1             | 5.3           | -0.06     | 4.5            | 3.8           | 0.03      |
| 55-59                                          | 6.2             | 7.2           | -0.04     | 5.8            | 6.6           | -0.03     |
| 60-64                                          | 8.0             | 9.0           | -0.04     | 7.9            | 8.0           | 0.00      |
| 65-69                                          | 14.3            | 14.0          | 0.01      | 14.3           | 14.3          | 0.00      |
| 70-74                                          | 17.0            | 14.3          | 0.07      | 16.8           | 17.2          | -0.01     |
| 75-79                                          | 14.9            | 12.8          | 0.06      | 14.7           | 14.3          | 0.01      |
| 80-84                                          | 12.3            | 16.9          | -0.13     | 12.2           | 12.5          | -0.01     |
| 85-89                                          | 15.4            | 8.6           | 0.21      | 15.2           | 15.4          | 0.00      |
| <b>Medical history: General</b>                |                 |               |           |                |               |           |
| Acute respiratory disease                      | 34.8            | 30.7          | 0.09      | 34.5           | 34.9          | -0.01     |
| Attention-deficit/hyperactivity disorder       | 0.7             | 0.5           | 0.02      | 0.6            | 0.6           | -0.01     |
| Chronic liver disease                          | 1.7             | 3.7           | -0.12     | 2.2            | 2.3           | -0.01     |
| Chronic obstructive lung disease               | 23.2            | 20.5          | 0.06      | 23.1           | 23.8          | -0.02     |
| Crohn's disease                                | 0.8             | 1.0           | -0.02     | 0.9            | 0.9           | 0.00      |
| Dementia                                       | 12.5            | 10.5          | 0.06      | 12.8           | 12.6          | 0.01      |
| Depressive disorder                            | 27.5            | 24.0          | 0.08      | 27.4           | 28.9          | -0.04     |
| Diabetes mellitus                              | 33.3            | 30.1          | 0.07      | 33.9           | 35.0          | -0.02     |
| Gastroesophageal reflux disease                | 35.0            | 26.4          | 0.19      | 32.9           | 33.7          | -0.02     |
| Gastrointestinal hemorrhage                    | 5.8             | 6.2           | -0.02     | 6.5            | 6.8           | -0.01     |
| Human immunodeficiency virus infection         | 0.2             | 0.2           | -0.01     | 0.2            | 0.3           | -0.02     |
| Hyperlipidemia                                 | 58.1            | 51.4          | 0.14      | 57.5           | 57.8          | -0.01     |
| Hypertensive disorder                          | 75.0            | 70.5          | 0.10      | 75.1           | 75.4          | -0.01     |
| Lesion of liver                                | 3.8             | 3.9           | 0.00      | 3.8            | 4.0           | -0.01     |
| Obesity                                        | 27.3            | 20.7          | 0.16      | 27.8           | 28.0          | 0.00      |
| Osteoarthritis                                 | 47.4            | 38.1          | 0.19      | 45.9           | 46.0          | 0.00      |
| Pneumonia                                      | 17.7            | 16.5          | 0.03      | 17.8           | 18.5          | -0.02     |
| Psoriasis                                      | 1.0             | 1.0           | 0.00      | 0.9            | 1.3           | -0.04     |
| Renal impairment                               | 32.7            | 27.1          | 0.12      | 34.7           | 35.4          | -0.01     |
| Rheumatoid arthritis                           | 4.9             | 4.5           | 0.02      | 4.5            | 4.8           | -0.02     |
| Schizophrenia                                  | 0.6             | 0.7           | 0.00      | 0.7            | 0.8           | 0.00      |
| Ulcerative colitis                             | 0.9             | 1.0           | -0.01     | 1.0            | 1.0           | 0.00      |
| Urinary tract infectious disease               | 25.7            | 26.5          | -0.02     | 27.2           | 28.4          | -0.03     |
| Viral hepatitis C                              | 0.7             | 0.6           | 0.00      | 0.9            | 0.9           | 0.00      |
| Visual system disorder                         | 32.7            | 29.2          | 0.08      | 31.7           | 32.4          | -0.01     |
| <b>Medical history: Cardiovascular disease</b> |                 |               |           |                |               |           |
| Cerebrovascular disease                        | 12.0            | 13.2          | -0.04     | 12.1           | 13.1          | -0.03     |
| Coronary arteriosclerosis                      | 19.4            | 16.4          | 0.08      | 19.5           | 19.7          | -0.01     |
| Heart disease                                  | 59.0            | 52.1          | 0.14      | 58.4           | 59.0          | -0.01     |
| Heart failure                                  | 27.3            | 19.5          | 0.19      | 27.0           | 27.6          | -0.02     |
| Ischemic heart disease                         | 15.5            | 12.8          | 0.08      | 15.7           | 15.6          | 0.00      |
| Peripheral vascular disease                    | 12.6            | 12.1          | 0.02      | 12.9           | 13.3          | -0.01     |
| Venous thrombosis                              | 68.8            | 74.8          | -0.14     | 70.1           | 70.4          | -0.01     |
| <b>Medical history: Neoplasms</b>              |                 |               |           |                |               |           |
| Hematologic neoplasm                           | 6.2             | 5.5           | 0.03      | 5.6            | 6.3           | -0.03     |
| Malignant lymphoma                             | 1.9             | 1.5           | 0.03      | 1.8            | 1.8           | 0.00      |
| Malignant neoplasm of anorectum                | 1.0             | 1.2           | -0.02     | 0.8            | 0.9           | -0.01     |
| Malignant neoplastic disease                   | 24.1            | 22.5          | 0.04      | 22.4           | 23.5          | -0.03     |
| Malignant tumor of breast                      | 7.3             | 6.8           | 0.02      | 6.5            | 6.4           | 0.01      |
| Malignant tumor of colon                       | 2.3             | 2.4           | -0.01     | 2.2            | 2.4           | -0.01     |
| Malignant tumor of lung                        | 4.7             | 3.6           | 0.05      | 4.0            | 3.7           | 0.02      |
| Malignant tumor of urinary bladder             | 0.5             | 0.5           | 0.00      | 0.6            | 0.5           | 0.02      |
| <b>Medication use</b>                          |                 |               |           |                |               |           |
| Agents acting on the renin-angiotensin system  | 46.2            | 42.7          | 0.07      | 45.8           | 46.3          | -0.01     |

|                                                                                           |      |      |       |      |      |       |
|-------------------------------------------------------------------------------------------|------|------|-------|------|------|-------|
| Antibacterials for systemic use                                                           | 61.0 | 57.9 | 0.06  | 58.8 | 60.1 | -0.03 |
| Antidepressants                                                                           | 38.8 | 35.9 | 0.06  | 37.6 | 38.9 | -0.03 |
| Anti-epileptics                                                                           | 30.3 | 23.9 | 0.14  | 29.3 | 30.3 | -0.02 |
| Anti-inflammatory and antirheumatic products                                              | 27.1 | 24.1 | 0.07  | 24.4 | 23.8 | 0.01  |
| Antineoplastic agents                                                                     | 10.7 | 9.8  | 0.03  | 9.2  | 9.4  | 0.00  |
| Antipsoriatics                                                                            | 1.1  | 1.0  | 0.01  | 1.2  | 1.5  | -0.02 |
| Antithrombotic agents                                                                     | 25.9 | 54.4 | -0.61 | 36.5 | 34.5 | 0.04  |
| Beta-blocking agents                                                                      | 37.4 | 34.7 | 0.06  | 37.8 | 37.5 | 0.01  |
| Calcium channel blockers                                                                  | 28.6 | 25.7 | 0.06  | 28.9 | 28.4 | 0.01  |
| Diuretics                                                                                 | 44.7 | 42.6 | 0.04  | 45.1 | 45.7 | -0.01 |
| Drugs for acid related disorders                                                          | 42.2 | 37.6 | 0.10  | 41.1 | 42.7 | -0.03 |
| Drugs for obstructive airway diseases                                                     | 32.4 | 27.6 | 0.10  | 30.5 | 31.3 | -0.02 |
| Drugs used in diabetes                                                                    | 22.7 | 20.4 | 0.06  | 22.7 | 24.0 | -0.03 |
| Immunosuppressants                                                                        | 6.0  | 5.1  | 0.04  | 5.6  | 5.6  | 0.00  |
| Lipid-modifying agents                                                                    | 45.4 | 40.6 | 0.10  | 45.5 | 45.4 | 0.00  |
| Opioids                                                                                   | 41.5 | 40.0 | 0.03  | 42.4 | 41.9 | 0.01  |
| Psycholeptics                                                                             | 36.2 | 33.9 | 0.05  | 35.6 | 36.7 | -0.02 |
| Psychostimulants, agents used for attention-deficit/hyperactivity disorder and nootropics | 2.4  | 2.1  | 0.02  | 2.1  | 1.6  | 0.04  |

PS, propensity score; VTE, venous thromboembolism.



**Online Resource 12.** Baseline characteristics before and after 1:1 PS matching in the VTE population: Dabigatran vs Warfarin

| Characteristic                                 | Before matching |               |           | After matching  |               |           |
|------------------------------------------------|-----------------|---------------|-----------|-----------------|---------------|-----------|
|                                                | Dabigatran<br>% | Warfarin<br>% | Std. diff | Dabigatran<br>% | Warfarin<br>% | Std. diff |
| <b>Age group, years</b>                        |                 |               |           |                 |               |           |
| 20-24                                          | <1.2            | 0.5           | -0.05     | <1.2            | 0.0           | 0.00      |
| 25-29                                          | <1.2            | 0.9           | -0.05     | <1.2            | <1.2          | -0.06     |
| 30-34                                          | 1.8             | 1.3           | 0.04      | 1.9             | 1.6           | 0.02      |
| 35-39                                          | 2.1             | 2.0           | 0.01      | 2.1             | 2.6           | -0.03     |
| 40-44                                          | 3.2             | 2.9           | 0.02      | 3.2             | 3.2           | 0.00      |
| 45-49                                          | 4.8             | 4.1           | 0.03      | 4.9             | 5.6           | -0.03     |
| 50-54                                          | 7.1             | 5.3           | 0.07      | 7.2             | 6.0           | 0.05      |
| 55-59                                          | 9.2             | 7.2           | 0.07      | 9.0             | 9.0           | 0.00      |
| 60-64                                          | 9.4             | 9.0           | 0.02      | 9.5             | 11.1          | -0.05     |
| 65-69                                          | 13.6            | 14.0          | -0.01     | 13.7            | 13.9          | -0.01     |
| 70-74                                          | 16.4            | 14.3          | 0.06      | 16.2            | 13.7          | 0.07      |
| 75-79                                          | 12.7            | 12.8          | 0.00      | 12.8            | 10.4          | 0.07      |
| 80-84                                          | 8.3             | 16.9          | -0.26     | 8.4             | 12.8          | -0.14     |
| 85-89                                          | 10.6            | 8.6           | 0.07      | 10.4            | 9.0           | 0.05      |
| <b>Medical history: General</b>                |                 |               |           |                 |               |           |
| Acute respiratory disease                      | 31.3            | 30.7          | 0.01      | 31.1            | 33.6          | -0.06     |
| Attention-deficit/hyperactivity disorder       | 1.2             | 0.5           | 0.07      | 1.2             | 1.2           | 0.00      |
| Chronic liver disease                          | 4.1             | 3.7           | 0.02      | 4.2             | 3.2           | 0.05      |
| Chronic obstructive lung disease               | 20.3            | 20.5          | -0.01     | 20.2            | 21.1          | -0.02     |
| Crohn's disease                                | 1.4             | 1.0           | 0.04      | 1.4             | <1.2          | 0.10      |
| Dementia                                       | 6.5             | 10.5          | -0.14     | 6.5             | 5.8           | 0.03      |
| Depressive disorder                            | 25.1            | 24.0          | 0.03      | 25.1            | 30.4          | -0.12     |
| Diabetes mellitus                              | 27.6            | 30.1          | -0.05     | 27.8            | 30.6          | -0.06     |
| Gastroesophageal reflux disease                | 30.2            | 26.4          | 0.08      | 30.2            | 30.6          | -0.01     |
| Gastrointestinal hemorrhage                    | 5.8             | 6.2           | -0.02     | 5.8             | 6.7           | -0.04     |
| Human immunodeficiency virus infection         | <1.2            | 0.2           | 0.00      | <1.2            | 0.0           | 0.00      |
| Hyperlipidemia                                 | 52.5            | 51.4          | 0.02      | 52.7            | 51.3          | 0.03      |
| Hypertensive disorder                          | 70.0            | 70.5          | -0.01     | 70.1            | 69.4          | 0.02      |
| Lesion of liver                                | 5.5             | 3.9           | 0.08      | 5.6             | 7.0           | -0.06     |
| Obesity                                        | 24.7            | 20.7          | 0.10      | 24.6            | 26.2          | -0.04     |
| Osteoarthritis                                 | 45.2            | 38.1          | 0.14      | 44.8            | 47.8          | -0.06     |
| Pneumonia                                      | 13.8            | 16.5          | -0.08     | 13.7            | 13.7          | 0.00      |
| Psoriasis                                      | 1.2             | 1.0           | 0.01      | 1.2             | 2.6           | -0.10     |
| Renal impairment                               | 22.1            | 27.1          | -0.12     | 22.0            | 20.4          | 0.04      |
| Rheumatoid arthritis                           | 1.6             | 4.5           | -0.17     | 1.6             | 2.1           | -0.03     |
| Schizophrenia                                  | <1.2            | 0.7           | 0.00      | <1.2            | 1.4           | -0.07     |
| Ulcerative colitis                             | 1.6             | 1.0           | 0.05      | 1.6             | <1.2          | 0.09      |
| Urinary tract infectious disease               | 24.4            | 26.5          | -0.05     | 24.4            | 25.1          | -0.02     |
| Viral hepatitis C                              | <1.2            | 0.6           | 0.01      | <1.2            | <1.2          | 0.00      |
| Visual system disorder                         | 29.5            | 29.2          | 0.01      | 29.2            | 28.8          | 0.01      |
| <b>Medical history: Cardiovascular disease</b> |                 |               |           |                 |               |           |
| Cerebrovascular disease                        | 10.1            | 13.2          | -0.10     | 9.7             | 12.1          | -0.07     |
| Coronary arteriosclerosis                      | 14.7            | 16.4          | -0.04     | 14.4            | 16.7          | -0.06     |
| Heart disease                                  | 51.6            | 52.1          | -0.01     | 51.5            | 52.9          | -0.03     |
| Heart failure                                  | 20.7            | 19.5          | 0.03      | 20.9            | 19.7          | 0.03      |
| Ischemic heart disease                         | 12.0            | 12.8          | -0.02     | 11.8            | 13.9          | -0.06     |
| Peripheral vascular disease                    | 10.6            | 12.1          | -0.05     | 10.4            | 10.4          | 0.00      |
| Venous thrombosis                              | 69.8            | 74.8          | -0.11     | 69.6            | 67.5          | 0.04      |
| <b>Medical history: Neoplasms</b>              |                 |               |           |                 |               |           |
| Hematologic neoplasm                           | 6.7             | 5.5           | 0.05      | 6.7             | 10.2          | -0.12     |
| Malignant lymphoma                             | 1.8             | 1.5           | 0.02      | 1.9             | 2.3           | -0.03     |
| Malignant neoplasm of anorectum                | <1.2            | 1.2           | -0.05     | <1.2            | <1.2          | -0.03     |
| Malignant neoplastic disease                   | 29.0            | 22.5          | 0.15      | 29.0            | 32.7          | -0.08     |
| Malignant tumor of breast                      | 7.1             | 6.8           | 0.01      | 7.2             | 11.1          | -0.14     |
| Malignant tumor of colon                       | 4.1             | 2.4           | 0.10      | 4.2             | 3.0           | 0.06      |
| Malignant tumor of lung                        | 5.5             | 3.6           | 0.09      | 5.6             | 6.0           | -0.02     |
| Malignant tumor of urinary bladder             | <1.2            | 0.5           | 0.00      | <1.2            | <1.2          | -0.04     |
| Primary malignant neoplasm of prostate         | 0.0             | 0.0           | 0.00      | 0.0             | <1.2          | 0.00      |
| <b>Medication use</b>                          |                 |               |           |                 |               |           |

|                                                                                           |      |      |       |      |      |       |
|-------------------------------------------------------------------------------------------|------|------|-------|------|------|-------|
| Agents acting on the renin-angiotensin system                                             | 41.9 | 42.7 | -0.02 | 41.8 | 41.1 | 0.01  |
| Antibacterials for systemic use                                                           | 61.1 | 57.9 | 0.06  | 60.8 | 61.9 | -0.02 |
| Antidepressants                                                                           | 37.1 | 35.8 | 0.03  | 37.1 | 39.2 | -0.04 |
| Anti-epileptics                                                                           | 29.5 | 23.9 | 0.13  | 29.2 | 30.6 | -0.03 |
| Anti-inflammatory and antirheumatic products                                              | 24.4 | 24.1 | 0.01  | 24.4 | 23.7 | 0.02  |
| Antineoplastic agents                                                                     | 11.5 | 9.8  | 0.06  | 11.6 | 9.5  | 0.07  |
| Antipsoriatics                                                                            | <1.2 | 1.0  | -0.07 | <1.2 | <1.2 | -0.03 |
| Antithrombotic agents                                                                     | 29.3 | 54.4 | -0.53 | 29.2 | 26.0 | 0.07  |
| Beta-blocking agents                                                                      | 29.5 | 34.6 | -0.11 | 29.7 | 32.7 | -0.06 |
| Calcium channel blockers                                                                  | 24.0 | 25.7 | -0.04 | 23.9 | 21.6 | 0.06  |
| Diuretics                                                                                 | 36.4 | 42.6 | -0.13 | 36.4 | 38.1 | -0.03 |
| Drugs for acid related disorders                                                          | 38.0 | 37.6 | 0.01  | 37.6 | 42.9 | -0.11 |
| Drugs for obstructive airway diseases                                                     | 28.1 | 27.6 | 0.01  | 27.6 | 31.8 | -0.09 |
| Drugs used in diabetes                                                                    | 20.5 | 20.4 | 0.00  | 20.6 | 21.8 | -0.03 |
| Immunosuppressants                                                                        | 5.8  | 5.1  | 0.03  | 5.8  | 4.4  | 0.06  |
| Lipid-modifying agents                                                                    | 41.5 | 40.6 | 0.02  | 41.5 | 41.3 | 0.00  |
| Opioids                                                                                   | 42.4 | 40.0 | 0.05  | 42.5 | 45.7 | -0.06 |
| Psycholeptics                                                                             | 36.9 | 33.9 | 0.06  | 36.9 | 40.8 | -0.08 |
| Psychostimulants, agents used for attention-deficit/hyperactivity disorder and nootropics | 3.9  | 2.1  | 0.11  | 3.9  | 1.6  | 0.14  |

PS, propensity score; VTE, venous thromboembolism.

**Online Resource 13.** Baseline characteristics before and after 1:1 PS matching in the VTE population: Rivaroxaban vs Apixaban

| Characteristic                                 | Before matching  |               |           | After matching   |               |           |
|------------------------------------------------|------------------|---------------|-----------|------------------|---------------|-----------|
|                                                | Rivaroxaban<br>% | Apixaban<br>% | Std. diff | Rivaroxaban<br>% | Apixaban<br>% | Std. diff |
| <b>Age group, years</b>                        |                  |               |           |                  |               |           |
| 20-24                                          | 0.7              | 0.2           | 0.07      | 0.5              | 0.3           | 0.04      |
| 25-29                                          | 1.0              | 0.5           | 0.06      | 0.7              | 0.6           | 0.01      |
| 30-34                                          | 1.3              | 0.8           | 0.05      | 0.9              | 1.1           | -0.01     |
| 35-39                                          | 2.6              | 1.3           | 0.09      | 1.8              | 1.6           | 0.02      |
| 40-44                                          | 3.5              | 2.0           | 0.09      | 2.4              | 2.5           | 0.00      |
| 45-49                                          | 5.0              | 2.9           | 0.11      | 3.7              | 3.4           | 0.02      |
| 50-54                                          | 6.5              | 4.1           | 0.11      | 5.0              | 4.8           | 0.01      |
| 55-59                                          | 8.8              | 6.2           | 0.10      | 7.2              | 7.3           | 0.00      |
| 60-64                                          | 10.1             | 8.0           | 0.07      | 8.9              | 8.8           | 0.01      |
| 65-69                                          | 14.2             | 14.3          | 0.00      | 14.3             | 14.9          | -0.02     |
| 70-74                                          | 15.0             | 17.0          | -0.06     | 16.5             | 17.2          | -0.02     |
| 75-79                                          | 11.9             | 14.9          | -0.09     | 14.1             | 13.9          | 0.00      |
| 80-84                                          | 9.7              | 12.3          | -0.08     | 11.1             | 11.2          | 0.00      |
| 85-89                                          | 9.7              | 15.4          | -0.17     | 12.7             | 12.6          | 0.00      |
| <b>Medical history: General</b>                |                  |               |           |                  |               |           |
| Acute respiratory disease                      | 28.8             | 34.8          | -0.13     | 31.8             | 31.6          | 0.00      |
| Attention-deficit/hyperactivity disorder       | 0.8              | 0.7           | 0.01      | 0.5              | 0.8           | -0.04     |
| Chronic liver disease                          | 2.1              | 1.7           | 0.03      | 1.7              | 1.5           | 0.02      |
| Chronic obstructive lung disease               | 17.4             | 23.2          | -0.15     | 20.5             | 19.9          | 0.01      |
| Crohn's disease                                | 0.9              | 0.8           | 0.01      | 0.9              | 0.7           | 0.02      |
| Dementia                                       | 8.4              | 12.5          | -0.13     | 10.5             | 10.3          | 0.01      |
| Depressive disorder                            | 24.1             | 27.5          | -0.08     | 26.7             | 26.6          | 0.00      |
| Diabetes mellitus                              | 26.0             | 33.3          | -0.16     | 30.5             | 28.8          | 0.04      |
| Gastroesophageal reflux disease                | 27.3             | 35.0          | -0.17     | 32.0             | 31.5          | 0.01      |
| Gastrointestinal hemorrhage                    | 4.4              | 5.8           | -0.07     | 4.8              | 5.0           | -0.01     |
| Human immunodeficiency virus infection         | 0.2              | 0.2           | 0.00      | 0.2              | 0.2           | -0.01     |
| Hyperlipidemia                                 | 49.0             | 58.1          | -0.18     | 55.5             | 53.8          | 0.03      |
| Hypertensive disorder                          | 64.0             | 75.0          | -0.24     | 71.6             | 70.2          | 0.03      |
| Lesion of liver                                | 4.2              | 3.8           | 0.02      | 4.1              | 3.9           | 0.01      |
| Obesity                                        | 23.4             | 27.3          | -0.09     | 26.9             | 25.4          | 0.03      |
| Osteoarthritis                                 | 40.1             | 47.4          | -0.15     | 45.5             | 44.7          | 0.02      |
| Pneumonia                                      | 13.0             | 17.7          | -0.13     | 15.1             | 15.0          | 0.00      |
| Psoriasis                                      | 1.2              | 1.0           | 0.02      | 1.3              | 1.0           | 0.03      |
| Renal impairment                               | 18.8             | 32.7          | -0.32     | 25.5             | 23.6          | 0.04      |
| Rheumatoid arthritis                           | 4.4              | 4.9           | -0.02     | 4.7              | 4.4           | 0.01      |
| Schizophrenia                                  | 0.6              | 0.6           | 0.00      | 0.7              | 0.6           | 0.01      |
| Ulcerative colitis                             | 0.8              | 0.9           | -0.02     | 0.8              | 0.9           | -0.01     |
| Urinary tract infectious disease               | 20.5             | 25.7          | -0.12     | 22.8             | 21.9          | 0.02      |
| Viral hepatitis C                              | 0.5              | 0.7           | -0.02     | 0.6              | 0.6           | 0.01      |
| Visual system disorder                         | 28.1             | 32.7          | -0.10     | 31.6             | 30.6          | 0.02      |
| <b>Medical history: Cardiovascular disease</b> |                  |               |           |                  |               |           |
| Cerebrovascular disease                        | 8.6              | 12.0          | -0.11     | 9.9              | 9.8           | 0.00      |
| Coronary arteriosclerosis                      | 13.1             | 19.4          | -0.17     | 16.2             | 15.3          | 0.02      |
| Heart disease                                  | 44.8             | 59.0          | -0.29     | 53.0             | 51.6          | 0.03      |
| Heart failure                                  | 16.2             | 27.3          | -0.27     | 21.7             | 21.2          | 0.01      |
| Ischemic heart disease                         | 10.0             | 15.5          | -0.16     | 12.4             | 12.3          | 0.00      |
| Peripheral vascular disease                    | 10.2             | 12.6          | -0.08     | 11.7             | 10.9          | 0.03      |
| Venous thrombosis                              | 73.4             | 68.8          | 0.10      | 69.2             | 70.2          | -0.02     |
| <b>Medical history: Neoplasms</b>              |                  |               |           |                  |               |           |
| Hematologic neoplasm                           | 6.8              | 6.2           | 0.03      | 6.7              | 6.4           | 0.01      |
| Malignant lymphoma                             | 1.8              | 1.9           | -0.01     | 2.0              | 2.0           | 0.00      |
| Malignant neoplasm of anorectum                | 1.2              | 1.0           | 0.02      | 1.1              | 1.1           | 0.00      |
| Malignant neoplastic disease                   | 24.9             | 24.1          | 0.02      | 24.7             | 24.6          | 0.00      |
| Malignant tumor of breast                      | 8.0              | 7.3           | 0.02      | 7.4              | 7.6           | -0.01     |
| Malignant tumor of colon                       | 2.4              | 2.3           | 0.00      | 2.3              | 2.6           | -0.02     |
| Malignant tumor of lung                        | 4.8              | 4.7           | 0.00      | 4.9              | 5.1           | -0.01     |
| Malignant tumor of urinary bladder             | 0.5              | 0.5           | 0.00      | 0.6              | 0.4           | 0.02      |
| <b>Medication use</b>                          |                  |               |           |                  |               |           |
| Agents acting on the renin-angiotensin system  | 39.5             | 46.2          | -0.14     | 44.6             | 42.7          | 0.04      |
| Antibacterials for systemic use                | 58.7             | 61.0          | -0.05     | 60.3             | 59.4          | 0.02      |

|                                                                                           |      |      |       |      |      |       |
|-------------------------------------------------------------------------------------------|------|------|-------|------|------|-------|
| Antidepressants                                                                           | 35.6 | 38.8 | -0.06 | 37.3 | 37.8 | -0.01 |
| Anti-epileptics                                                                           | 25.2 | 30.3 | -0.11 | 28.3 | 28.1 | 0.00  |
| Anti-inflammatory and antirheumatic products                                              | 27.1 | 27.1 | 0.00  | 26.8 | 27.4 | -0.01 |
| Antineoplastic agents                                                                     | 12.0 | 10.7 | 0.04  | 11.5 | 11.2 | 0.01  |
| Antipsoriatics                                                                            | 0.4  | 1.1  | -0.08 | 0.6  | 0.6  | 0.00  |
| Antithrombotic agents                                                                     | 23.0 | 25.9 | -0.07 | 24.8 | 24.1 | 0.01  |
| Beta-blocking agents                                                                      | 29.4 | 37.4 | -0.17 | 33.5 | 32.5 | 0.02  |
| Calcium channel blockers                                                                  | 21.0 | 28.6 | -0.18 | 25.2 | 24.1 | 0.02  |
| Diuretics                                                                                 | 37.3 | 44.7 | -0.15 | 41.8 | 40.3 | 0.03  |
| Drugs for acid related disorders                                                          | 35.2 | 42.2 | -0.14 | 39.0 | 38.7 | 0.01  |
| Drugs for obstructive airway diseases                                                     | 27.9 | 32.4 | -0.10 | 30.4 | 30.5 | 0.00  |
| Drugs used in diabetes                                                                    | 17.8 | 22.7 | -0.12 | 20.7 | 19.7 | 0.03  |
| Immunosuppressants                                                                        | 5.3  | 6.0  | -0.03 | 5.9  | 5.7  | 0.01  |
| Lipid-modifying agents                                                                    | 37.2 | 45.4 | -0.17 | 42.2 | 41.0 | 0.02  |
| Opioids                                                                                   | 40.6 | 41.5 | -0.02 | 41.1 | 41.7 | -0.01 |
| Psycholeptics                                                                             | 36.8 | 36.2 | 0.01  | 35.9 | 36.3 | -0.01 |
| Psychostimulants, agents used for attention-deficit/hyperactivity disorder and nootropics | 2.7  | 2.4  | 0.02  | 2.2  | 2.7  | -0.03 |

PS, propensity score; VTE, venous thromboembolism.

**Online Resource 14.** Baseline characteristics before and after 1:1 PS matching in the VTE population: Rivaroxaban vs Dabigatran

| Characteristic                                 | Before matching  |                 |           | After matching   |                 |           |
|------------------------------------------------|------------------|-----------------|-----------|------------------|-----------------|-----------|
|                                                | Rivaroxaban<br>% | Dabigatran<br>% | Std. diff | Rivaroxaban<br>% | Dabigatran<br>% | Std. diff |
| <b>Age group, years</b>                        |                  |                 |           |                  |                 |           |
| 20-24                                          | 0.7              | <1.2            | 0.07      | <1.2             | <1.2            | 0.10      |
| 25-29                                          | 1.0              | <1.2            | 0.06      | <1.2             | <1.2            | 0.00      |
| 30-34                                          | 1.3              | 1.8             | -0.04     | 1.5              | 2.0             | -0.04     |
| 35-39                                          | 2.6              | 2.1             | 0.03      | 2.2              | 2.0             | 0.02      |
| 40-44                                          | 3.5              | 3.2             | 0.02      | 3.5              | 3.2             | 0.01      |
| 45-49                                          | 5.0              | 4.8             | 0.01      | 4.2              | 5.2             | -0.05     |
| 50-54                                          | 6.5              | 7.1             | -0.03     | 4.7              | 6.9             | -0.10     |
| 55-59                                          | 8.8              | 9.2             | -0.02     | 8.2              | 8.2             | 0.00      |
| 60-64                                          | 10.1             | 9.4             | 0.02      | 10.4             | 9.4             | 0.03      |
| 65-69                                          | 14.2             | 13.6            | 0.02      | 15.6             | 13.1            | 0.07      |
| 70-74                                          | 15.0             | 16.4            | -0.04     | 14.6             | 17.1            | -0.07     |
| 75-79                                          | 11.9             | 12.7            | -0.02     | 12.9             | 12.9            | 0.00      |
| 80-84                                          | 9.7              | 8.3             | 0.05      | 8.7              | 8.2             | 0.02      |
| 85-89                                          | 9.7              | 10.6            | -0.03     | 12.1             | 11.1            | 0.03      |
| <b>Medical history: General</b>                |                  |                 |           |                  |                 |           |
| Acute respiratory disease                      | 28.8             | 31.3            | -0.06     | 35.1             | 31.2            | 0.08      |
| Attention-deficit/hyperactivity disorder       | 0.8              | 1.2             | -0.04     | <1.2             | <1.2            | -0.06     |
| Chronic liver disease                          | 2.1              | 4.1             | -0.12     | 2.5              | 4.2             | -0.10     |
| Chronic obstructive lung disease               | 17.4             | 20.3            | -0.08     | 25.2             | 21.0            | 0.10      |
| Crohn's disease                                | 0.9              | 1.4             | -0.05     | <1.2             | 1.2             | -0.12     |
| Dementia                                       | 8.4              | 6.5             | 0.08      | 7.9              | 6.9             | 0.04      |
| Depressive disorder                            | 24.1             | 25.1            | -0.02     | 28.2             | 25.7            | 0.06      |
| Diabetes mellitus                              | 26.0             | 27.6            | -0.04     | 28.2             | 28.2            | 0.00      |
| Gastroesophageal reflux disease                | 27.3             | 30.2            | -0.06     | 36.6             | 30.7            | 0.13      |
| Gastrointestinal hemorrhage                    | 4.4              | 5.8             | -0.06     | 8.4              | 5.7             | 0.11      |
| Human immunodeficiency virus infection         | 0.2              | <1.2            | -0.01     | <1.2             | <1.2            | 0.00      |
| Hyperlipidemia                                 | 49.0             | 52.5            | -0.07     | 54.5             | 53.0            | 0.03      |
| Hypertensive disorder                          | 64.0             | 70.0            | -0.13     | 72.3             | 70.3            | 0.04      |
| Lesion of liver                                | 4.2              | 5.5             | -0.06     | 5.9              | 5.7             | 0.01      |
| Obesity                                        | 23.4             | 24.7            | -0.03     | 27.2             | 24.8            | 0.06      |
| Osteoarthritis                                 | 40.1             | 45.2            | -0.10     | 47.3             | 45.5            | 0.04      |
| Pneumonia                                      | 13.0             | 13.8            | -0.02     | 14.1             | 14.1            | 0.00      |
| Psoriasis                                      | 1.2              | 1.2             | 0.00      | 1.5              | 1.2             | 0.02      |
| Renal impairment                               | 18.8             | 22.1            | -0.08     | 24.3             | 22.5            | 0.04      |
| Rheumatoid arthritis                           | 4.4              | 1.6             | 0.16      | 3.2              | 1.5             | 0.12      |
| Schizophrenia                                  | 0.6              | <1.2            | -0.01     | <1.2             | <1.2            | 0.03      |
| Ulcerative colitis                             | 0.8              | 1.6             | -0.08     | 1.5              | 1.2             | 0.02      |
| Urinary tract infectious disease               | 20.5             | 24.4            | -0.10     | 23.5             | 24.8            | -0.03     |
| Viral hepatitis C                              | 0.5              | <1.2            | -0.02     | <1.2             | <1.2            | -0.07     |
| Visual system disorder                         | 28.1             | 29.5            | -0.03     | 29.0             | 30.9            | -0.04     |
| <b>Medical history: Cardiovascular disease</b> |                  |                 |           |                  |                 |           |
| Cerebrovascular disease                        | 8.6              | 10.1            | -0.05     | 14.1             | 9.9             | 0.13      |
| Coronary arteriosclerosis                      | 13.1             | 14.7            | -0.05     | 16.6             | 14.1            | 0.07      |
| Heart disease                                  | 44.8             | 51.6            | -0.14     | 55.9             | 51.0            | 0.10      |
| Heart failure                                  | 16.2             | 20.7            | -0.12     | 20.3             | 21.0            | -0.02     |
| Ischemic heart disease                         | 10.0             | 12.0            | -0.06     | 16.1             | 11.6            | 0.13      |
| Peripheral vascular disease                    | 10.2             | 10.6            | -0.01     | 10.4             | 10.4            | 0.00      |
| Venous thrombosis                              | 73.4             | 69.8            | 0.08      | 66.1             | 68.8            | -0.06     |
| <b>Medical history: Neoplasms</b>              |                  |                 |           |                  |                 |           |
| Hematologic neoplasm                           | 6.8              | 6.7             | 0.00      | 8.7              | 6.2             | 0.10      |
| Malignant lymphoma                             | 1.8              | 1.8             | 0.00      | 1.5              | 1.7             | -0.02     |
| Malignant neoplasm of anorectum                | 1.2              | <1.2            | 0.05      | 1.7              | <1.2            | 0.09      |
| Malignant neoplastic disease                   | 24.9             | 29.0            | -0.09     | 30.7             | 28.5            | 0.05      |
| Malignant tumor of breast                      | 8.0              | 7.1             | 0.03      | 6.7              | 6.4             | 0.01      |
| Malignant tumor of colon                       | 2.4              | 4.1             | -0.10     | 3.5              | 4.5             | -0.05     |
| Malignant tumor of lung                        | 4.8              | 5.5             | -0.03     | 5.0              | 4.5             | 0.02      |
| Malignant tumor of urinary bladder             | 0.5              | <1.2            | 0.01      | <1.2             | <1.2            | 0.06      |
| <b>Medication use</b>                          |                  |                 |           |                  |                 |           |
| Agents acting on the renin-angiotensin system  | 39.5             | 41.9            | -0.05     | 40.8             | 41.3            | -0.01     |

|                                                                                           |      |      |       |      |      |       |
|-------------------------------------------------------------------------------------------|------|------|-------|------|------|-------|
| Antibacterials for systemic use                                                           | 58.7 | 61.1 | -0.05 | 59.7 | 59.7 | 0.00  |
| Antidepressants                                                                           | 35.6 | 37.1 | -0.03 | 37.9 | 37.4 | 0.01  |
| Anti-epileptics                                                                           | 25.2 | 29.5 | -0.10 | 30.2 | 29.7 | 0.01  |
| Anti-inflammatory and antirheumatic products                                              | 27.1 | 24.4 | 0.06  | 22.0 | 24.5 | -0.06 |
| Antineoplastic agents                                                                     | 12.0 | 11.5 | 0.02  | 11.1 | 11.1 | 0.00  |
| Antipsoriatics                                                                            | 0.4  | <1.2 | 0.00  | 0.0  | <1.2 | 0.00  |
| Antithrombotic agents                                                                     | 23.0 | 29.3 | -0.14 | 34.7 | 29.0 | 0.12  |
| Beta-blocking agents                                                                      | 29.4 | 29.5 | 0.00  | 33.7 | 29.0 | 0.10  |
| Calcium channel blockers                                                                  | 21.0 | 24.0 | -0.07 | 20.5 | 24.0 | -0.08 |
| Diuretics                                                                                 | 37.3 | 36.4 | 0.02  | 34.9 | 35.4 | -0.01 |
| Drugs for acid related disorders                                                          | 35.2 | 38.2 | -0.06 | 39.6 | 38.6 | 0.02  |
| Drugs for obstructive airway diseases                                                     | 27.9 | 28.1 | 0.00  | 30.4 | 28.7 | 0.04  |
| Drugs used in diabetes                                                                    | 17.8 | 20.5 | -0.07 | 18.3 | 20.0 | -0.04 |
| Immunosuppressants                                                                        | 5.3  | 5.8  | -0.02 | 3.7  | 5.4  | -0.08 |
| Lipid-modifying agents                                                                    | 37.2 | 41.7 | -0.09 | 44.3 | 41.8 | 0.05  |
| Opioids                                                                                   | 40.6 | 42.4 | -0.04 | 44.3 | 41.8 | 0.05  |
| Psycholeptics                                                                             | 36.8 | 36.9 | 0.00  | 35.4 | 36.9 | -0.03 |
| Psychostimulants, agents used for attention-deficit/hyperactivity disorder and nootropics | 2.7  | 3.9  | -0.07 | 3.7  | 3.5  | 0.01  |

PS, propensity score; VTE, venous thromboembolism.

**Online Resource 15.** Baseline characteristics before and after 1:1 PS matching in the VTE population: Apixaban vs Dabigatran

| Characteristic                                 | Before matching |                 |           | After matching |                 |           |
|------------------------------------------------|-----------------|-----------------|-----------|----------------|-----------------|-----------|
|                                                | Apixaban<br>%   | Dabigatran<br>% | Std. diff | Apixaban<br>%  | Dabigatran<br>% | Std. diff |
| <b>Age group, years</b>                        |                 |                 |           |                |                 |           |
| 20-24                                          | 0.2             | <1.2            | 0.00      | <1.3           | <1.3            | 0.07      |
| 25-29                                          | 0.5             | <1.2            | 0.00      | 1.3            | <1.3            | 0.08      |
| 30-34                                          | 0.8             | 1.8             | -0.09     | <1.3           | 2.1             | -0.11     |
| 35-39                                          | 1.3             | 2.1             | -0.06     | 1.9            | 1.6             | 0.02      |
| 40-44                                          | 2.0             | 3.2             | -0.07     | 4.3            | 3.2             | 0.06      |
| 45-49                                          | 2.9             | 4.8             | -0.10     | 4.0            | 4.5             | -0.03     |
| 50-54                                          | 4.1             | 7.1             | -0.13     | 5.9            | 6.9             | -0.04     |
| 55-59                                          | 6.2             | 9.2             | -0.11     | 7.2            | 7.7             | -0.02     |
| 60-64                                          | 8.0             | 9.4             | -0.05     | 9.0            | 9.6             | -0.02     |
| 65-69                                          | 14.3            | 13.6            | 0.02      | 13.8           | 13.3            | 0.02      |
| 70-74                                          | 17.0            | 16.4            | 0.02      | 15.7           | 18.1            | -0.06     |
| 75-79                                          | 14.9            | 12.7            | 0.06      | 10.9           | 12.2            | -0.04     |
| 80-84                                          | 12.3            | 8.3             | 0.13      | 11.7           | 8.2             | 0.12      |
| 85-89                                          | 15.4            | 10.6            | 0.14      | 12.8           | 11.7            | 0.03      |
| <b>Medical history: General</b>                |                 |                 |           |                |                 |           |
| Acute respiratory disease                      | 34.8            | 31.3            | 0.07      | 29.3           | 32.2            | -0.06     |
| Attention-deficit/hyperactivity disorder       | 0.7             | 1.2             | -0.05     | <1.3           | <1.3            | -0.06     |
| Chronic liver disease                          | 1.7             | 4.1             | -0.14     | 2.1            | 3.7             | -0.10     |
| Chronic obstructive lung disease               | 23.2            | 20.3            | 0.07      | 22.9           | 21.8            | 0.03      |
| Crohn's disease                                | 0.8             | 1.4             | -0.06     | <1.3           | 1.3             | -0.08     |
| Dementia                                       | 12.5            | 6.5             | 0.21      | 10.6           | 7.2             | 0.12      |
| Depressive disorder                            | 27.5            | 25.1            | 0.06      | 27.4           | 26.6            | 0.02      |
| Diabetes mellitus                              | 33.3            | 27.6            | 0.12      | 31.9           | 29.3            | 0.06      |
| Gastroesophageal reflux disease                | 35.0            | 30.2            | 0.10      | 34.6           | 31.6            | 0.06      |
| Gastrointestinal hemorrhage                    | 5.8             | 5.8             | 0.00      | 6.9            | 6.4             | 0.02      |
| Human immunodeficiency virus infection         | 0.2             | <1.2            | -0.01     | <1.3           | <1.3            | 0.00      |
| Hyperlipidemia                                 | 58.1            | 52.5            | 0.11      | 50.0           | 53.2            | -0.06     |
| Hypertensive disorder                          | 75.0            | 70.0            | 0.11      | 71.3           | 71.0            | 0.01      |
| Lesion of liver                                | 3.8             | 5.5             | -0.08     | 4.8            | 5.6             | -0.04     |
| Obesity                                        | 27.3            | 24.7            | 0.06      | 24.7           | 25.5            | -0.02     |
| Osteoarthritis                                 | 47.4            | 45.2            | 0.04      | 49.5           | 46.8            | 0.05      |
| Pneumonia                                      | 17.7            | 13.8            | 0.10      | 14.4           | 13.8            | 0.02      |
| Psoriasis                                      | 1.0             | 1.2             | -0.02     | <1.3           | <1.3            | -0.03     |
| Renal impairment                               | 32.7            | 22.1            | 0.24      | 26.3           | 23.9            | 0.06      |
| Rheumatoid arthritis                           | 4.9             | 1.6             | 0.19      | 4.5            | 1.6             | 0.17      |
| Schizophrenia                                  | 0.6             | <1.2            | 0.00      | <1.3           | <1.3            | 0.00      |
| Ulcerative colitis                             | 0.9             | 1.6             | -0.06     | <1.3           | 1.6             | -0.10     |
| Urinary tract infectious disease               | 25.7            | 24.4            | 0.03      | 25.3           | 25.0            | 0.01      |
| Viral hepatitis C                              | 0.7             | <1.2            | 0.00      | <1.3           | <1.3            | 0.06      |
| Visual system disorder                         | 32.7            | 29.5            | 0.07      | 28.2           | 31.6            | -0.08     |
| <b>Medical history: Cardiovascular disease</b> |                 |                 |           |                |                 |           |
| Cerebrovascular disease                        | 12.0            | 10.1            | 0.06      | 12.0           | 9.8             | 0.07      |
| Coronary arteriosclerosis                      | 19.4            | 14.7            | 0.12      | 14.6           | 13.8            | 0.02      |
| Heart disease                                  | 59.0            | 51.6            | 0.15      | 53.7           | 51.6            | 0.04      |
| Heart failure                                  | 27.3            | 20.7            | 0.16      | 22.3           | 21.8            | 0.01      |
| Ischemic heart disease                         | 15.5            | 12.0            | 0.10      | 14.1           | 11.2            | 0.09      |
| Peripheral vascular disease                    | 12.6            | 10.6            | 0.06      | 10.9           | 11.2            | -0.01     |
| Venous thrombosis                              | 68.8            | 69.8            | -0.02     | 66.2           | 67.8            | -0.03     |
| <b>Medical history: Neoplasms</b>              |                 |                 |           |                |                 |           |
| Hematologic neoplasm                           | 6.2             | 6.7             | -0.02     | 7.4            | 6.4             | 0.04      |
| Malignant lymphoma                             | 1.9             | 1.8             | 0.01      | 2.1            | 1.9             | 0.02      |
| Malignant neoplasm of anorectum                | 1.0             | <1.2            | 0.03      | <1.3           | <1.3            | 0.03      |
| Malignant neoplastic disease                   | 24.1            | 29.0            | -0.11     | 27.9           | 28.2            | -0.01     |
| Malignant tumor of breast                      | 7.3             | 7.1             | 0.01      | 8.0            | 6.6             | 0.05      |
| Malignant tumor of colon                       | 2.3             | 4.1             | -0.10     | 3.7            | 4.3             | -0.03     |
| Malignant tumor of lung                        | 4.7             | 5.5             | -0.04     | 6.1            | 4.5             | 0.07      |
| Malignant tumor of urinary bladder             | 0.5             | <1.2            | 0.00      | <1.3           | <1.3            | 0.03      |
| <b>Medication use</b>                          |                 |                 |           |                |                 |           |
| Agents acting on the renin-angiotensin system  | 46.2            | 41.9            | 0.09      | 39.1           | 41.2            | -0.04     |
| Antibacterials for systemic use                | 61.0            | 61.1            | 0.00      | 58.0           | 60.1            | -0.04     |

|                                                                                           |      |      |       |      |      |       |
|-------------------------------------------------------------------------------------------|------|------|-------|------|------|-------|
| Antidepressants                                                                           | 38.8 | 37.1 | 0.03  | 35.4 | 38.0 | -0.06 |
| Anti-epileptics                                                                           | 30.3 | 29.5 | 0.02  | 25.8 | 30.6 | -0.11 |
| Anti-inflammatory and antirheumatic products                                              | 27.1 | 24.4 | 0.06  | 26.9 | 25.0 | 0.04  |
| Antineoplastic agents                                                                     | 10.7 | 11.5 | -0.03 | 11.4 | 11.4 | 0.00  |
| Antipsoriatics                                                                            | 1.1  | <1.2 | 0.08  | <1.3 | <1.3 | 0.03  |
| Antithrombotic agents                                                                     | 25.9 | 29.3 | -0.08 | 34.3 | 30.3 | 0.08  |
| Beta-blocking agents                                                                      | 37.4 | 29.5 | 0.17  | 31.1 | 29.0 | 0.05  |
| Calcium channel blockers                                                                  | 28.6 | 24.0 | 0.10  | 26.3 | 25.5 | 0.02  |
| Diuretics                                                                                 | 44.7 | 36.4 | 0.17  | 37.8 | 35.1 | 0.06  |
| Drugs for acid related disorders                                                          | 42.2 | 38.2 | 0.08  | 40.7 | 39.6 | 0.02  |
| Drugs for obstructive airway diseases                                                     | 32.4 | 28.1 | 0.09  | 29.0 | 28.2 | 0.02  |
| Drugs used in diabetes                                                                    | 22.7 | 20.5 | 0.05  | 22.3 | 21.3 | 0.03  |
| Immunosuppressants                                                                        | 6.0  | 5.8  | 0.01  | 5.9  | 5.9  | 0.00  |
| Lipid-modifying agents                                                                    | 45.4 | 41.7 | 0.08  | 34.3 | 42.3 | -0.16 |
| Opioids                                                                                   | 41.5 | 42.4 | -0.02 | 44.1 | 42.8 | 0.03  |
| Psycholeptics                                                                             | 36.2 | 36.9 | -0.01 | 39.1 | 36.7 | 0.05  |
| Psychostimulants, agents used for attention-deficit/hyperactivity disorder and nootropics | 2.4  | 3.9  | -0.08 | 3.7  | 4.0  | -0.01 |

PS, propensity score; VTE, venous thromboembolism.



**Online Resource 16.** After matching (adjusted) incidence rates by indication and exposure group; on-treatment, 1:100 PS matching

| Indication              | T vs C                    | Database                | Patients |        | TAR    |        | Events |     | IR     |       | MDRR   |
|-------------------------|---------------------------|-------------------------|----------|--------|--------|--------|--------|-----|--------|-------|--------|
|                         |                           |                         | T        | C      | T      | C      | T      | C   | T      | C     |        |
| AF                      | Rivaroxaban vs Warfarin   | CCAIE                   | 2,909    | 6,495  | 719    | 1,931  | 6      | 18  | 8.34   | 9.32  | 3.45   |
|                         |                           | MDCR                    | 9,362    | 20,817 | 3,063  | 6,894  | 12     | 16  | 3.92   | 2.32  | 3.14   |
|                         |                           | Optum                   | 13,891   | 34,511 | 4,249  | 13,552 | 22     | 27  | 5.18   | 1.99  | 2.42   |
|                         |                           | Meta-analysis           | 26,162   | 61,823 | 8,032  | 22,378 | 40     | 61  | 4.98   | 2.73  | 1.84   |
|                         | Apixaban vs Warfarin      | CCAIE                   | 1,971    | 3,924  | 487    | 1,231  | 5      | 14  | 10.26  | 11.37 | 3.91   |
|                         |                           | MDCR                    | 6,554    | 12,901 | 2,164  | 4,334  | <5     | 10  | <2.31  | 2.31  | >4.62  |
|                         |                           | Optum                   | 13,282   | 25,981 | 4,052  | 10,396 | 11     | 21  | 2.71   | 2.02  | 2.85   |
|                         |                           | Meta-analysis           | 21,807   | 42,806 | 6,704  | 15,961 | <21    | 45  | <3.13  | 2.82  | >2.07  |
|                         | Dabigatran vs Warfarin    | CCAIE                   | 3,086    | 8,440  | 722    | 2,464  | <5     | 21  | <6.92  | 8.52  | >3.46  |
|                         |                           | MDCR                    | 7,949    | 27,637 | 2,357  | 9,103  | 6      | 17  | 2.54   | 1.87  | 4.07   |
|                         |                           | Optum                   | 7,126    | 38,367 | 1,876  | 14,817 | <5     | 29  | <2.66  | 1.96  | >3.75  |
|                         |                           | Meta-analysis           | 18,161   | 74,444 | 4,957  | 26,386 | <16    | 67  | <3.23  | 2.54  | >2.17  |
|                         | Rivaroxaban vs Apixaban   | CCAIE                   | 5,091    | 8,240  | 1,335  | 2,202  | 16     | 12  | 11.98  | 5.45  | 2.97   |
|                         |                           | MDCD                    | 2,009    | 3,345  | 427    | 695    | <5     | 0   | <11.69 | 0.00  | >13.30 |
|                         |                           | MDCR                    | 9,444    | 18,474 | 3,064  | 6,210  | 11     | 12  | 3.59   | 1.93  | 3.44   |
|                         |                           | Optum                   | 17,478   | 39,594 | 5,563  | 12,534 | 26     | 38  | 4.67   | 3.03  | 2.14   |
|                         |                           | Meta-analysis           | 32,013   | 66,308 | 9,963  | 20,948 | 53     | 62  | 5.32   | 2.96  | 1.75   |
|                         | Rivaroxaban vs Dabigatran | MDCR                    | 4,028    | 6,135  | 1,382  | 1,775  | 7      | <5  | 5.06   | <2.82 | >57.40 |
|                         |                           | Optum                   | 4,729    | 5,991  | 1,439  | 1,554  | 10     | <5  | 6.95   | <3.22 | >12.47 |
|                         |                           | Meta-analysis           | 8,757    | 12,126 | 2,822  | 3,329  | 17     | <10 | 6.02   | <3.00 | >8.55  |
|                         | Apixaban vs Dabigatran    | MDCR                    | 2,172    | 2,453  | 751    | 700    | <5     | <5  | <6.65  | <7.14 | >Inf   |
|                         |                           | Optum                   | 3,102    | 3,476  | 973    | 921    | 5      | <5  | 5.14   | <5.43 | >Inf   |
|                         |                           | Meta-analysis           | 5,274    | 5,929  | 1,725  | 1,622  | <10    | <10 | <5.80  | <6.16 | >Inf   |
|                         | VTE                       | Rivaroxaban vs Warfarin | CCAIE    | 5,027  | 17,425 | 937    | 4,778  | 28  | 50     | 29.87 | 10.46  |
| MDCD                    |                           |                         | 2,606    | 7,136  | 414    | 1,720  | 6      | 16  | 14.47  | 9.30  | 3.85   |
| Optum                   |                           |                         | 6,921    | 22,402 | 1,516  | 7,042  | 22     | 39  | 14.51  | 5.54  | 2.33   |
| Meta-analysis           |                           |                         | 14,554   | 46,963 | 2,868  | 13,541 | 56     | 105 | 19.52  | 7.75  | 1.68   |
| Apixaban vs Warfarin    |                           | CCAIE                   | 1,922    | 7,633  | 392    | 2,115  | 6      | 22  | 15.29  | 10.40 | 3.75   |
|                         |                           | MDCD                    | 1,214    | 4,565  | 200    | 1,093  | <5     | 10  | <24.97 | 9.15  | >5.90  |
|                         |                           | Optum                   | 4,087    | 12,615 | 964    | 4,076  | 9      | 22  | 9.33   | 5.40  | 3.22   |
|                         |                           | Meta-analysis           | 7,223    | 24,813 | 1,557  | 7,285  | <20    | 54  | <12.84 | 7.41  | >2.18  |
| Rivaroxaban vs Apixaban |                           | CCAIE                   | 4,590    | 5,197  | 908    | 1,056  | 25     | 10  | 27.50  | 9.47  | 2.58   |
|                         |                           | MDCR                    | 2,265    | 2,920  | 498    | 705    | <5     | <5  | <10.02 | <7.09 | >Inf   |
|                         |                           | Optum                   | 7,678    | 10,012 | 1,768  | 2,490  | 24     | 14  | 13.57  | 5.62  | 2.50   |
|                         |                           | Meta-analysis           | 14,533   | 18,129 | 3,176  | 4,252  | <54    | <29 | <17.00 | <6.82 | >3.09  |

AF, atrial fibrillation; C, comparator; CCAIE, IBM MarketScan® Commercial Database; Inf, infinity; IR, incidence rate; MDCD, IBM MarketScan® Multi-state Medicaid; MDCR, IBM MarketScan® Medicare Supplemental Beneficiaries; MDRR, minimal detectable relative risk; T, treatment; TAR, time-at-risk; VTE, venous thromboembolism.

**Online Resource 17.** After matching (adjusted) incidence rates by indication and exposure group; on-treatment (30d gap), 1:100 PS matching

| Indication              | T vs C                    | Database                | Patients |        | TAR    |        | Events |     | IR     |       | MDRR  |
|-------------------------|---------------------------|-------------------------|----------|--------|--------|--------|--------|-----|--------|-------|-------|
|                         |                           |                         | T        | C      | T      | C      | T      | C   | T      | C     |       |
| AF                      | Rivaroxaban vs Warfarin   | CCAIE                   | 2,909    | 6,495  | 1,908  | 3,475  | 25     | 33  | 13.10  | 9.50  | 2.22  |
|                         |                           | MDCR                    | 9,362    | 20,817 | 8,302  | 13,271 | 28     | 23  | 3.37   | 1.73  | 2.34  |
|                         |                           | Optum                   | 13,891   | 34,511 | 12,358 | 27,886 | 54     | 61  | 4.37   | 2.19  | 1.78  |
|                         |                           | Meta-analysis           | 26,162   | 61,823 | 22,569 | 44,633 | 107    | 117 | 4.74   | 2.62  | 1.51  |
|                         | Apixaban vs Warfarin      | CCAIE                   | 1,971    | 3,924  | 1,484  | 2,212  | 11     | 22  | 7.41   | 9.95  | 2.81  |
|                         |                           | MDCR                    | 6,554    | 12,901 | 6,206  | 8,037  | 13     | 16  | 2.09   | 1.99  | 3.01  |
|                         |                           | Optum                   | 13,282   | 25,981 | 12,602 | 20,534 | 32     | 44  | 2.54   | 2.14  | 1.97  |
|                         |                           | Meta-analysis           | 21,807   | 42,806 | 20,292 | 30,784 | 56     | 82  | 2.76   | 2.66  | 1.66  |
|                         | Dabigatran vs Warfarin    | CCAIE                   | 3,086    | 8,440  | 1,765  | 4,448  | 13     | 40  | 7.36   | 8.99  | 2.38  |
|                         |                           | MDCR                    | 7,949    | 27,637 | 6,369  | 17,593 | 23     | 28  | 3.61   | 1.59  | 2.56  |
|                         |                           | Optum                   | 7,126    | 38,367 | 5,947  | 31,381 | 15     | 69  | 2.52   | 2.20  | 2.32  |
|                         | Rivaroxaban vs Apixaban   | CCAIE                   | 5,091    | 8,240  | 3,419  | 5,949  | 36     | 41  | 10.53  | 6.89  | 1.93  |
|                         |                           | MDCR                    | 9,444    | 18,474 | 7,849  | 16,317 | 27     | 32  | 3.44   | 1.96  | 2.16  |
|                         |                           | Optum                   | 17,478   | 39,594 | 14,321 | 33,323 | 63     | 82  | 4.40   | 2.46  | 1.66  |
|                         |                           | Meta-analysis           | 32,013   | 66,308 | 25,590 | 55,590 | 126    | 155 | 4.92   | 2.79  | 1.43  |
|                         | Rivaroxaban vs Dabigatran | CCAIE                   | 1,972    | 2,939  | 1,339  | 1,568  | 20     | 10  | 14.93  | 6.38  | 2.84  |
|                         |                           | MDCR                    | 4,028    | 6,135  | 3,836  | 4,606  | 17     | 14  | 4.43   | 3.04  | 2.80  |
|                         |                           | Optum                   | 4,729    | 5,991  | 4,525  | 4,782  | 23     | 14  | 5.08   | 2.93  | 2.53  |
|                         |                           | Meta-analysis           | 10,729   | 15,065 | 9,701  | 10,956 | 60     | 38  | 6.18   | 3.47  | 1.78  |
|                         | Apixaban vs Dabigatran    | CCAIE                   | 1,044    | 1,136  | 805    | 633    | 11     | 6   | 13.65  | 9.47  | 3.90  |
|                         |                           | MDCR                    | 2,172    | 2,453  | 2,309  | 1,850  | <5     | 9   | <2.17  | 4.86  | >4.48 |
|                         |                           | Optum                   | 3,102    | 3,476  | 3,072  | 2,690  | 11     | 8   | 3.58   | 2.97  | 3.62  |
|                         |                           | Meta-analysis           | 6,318    | 7,065  | 6,187  | 5,174  | <27    | 23  | <4.36  | 4.45  | >2.21 |
|                         | VTE                       | Rivaroxaban vs Warfarin | CCAIE    | 5,027  | 17,425 | 2,487  | 8,383  | 54  | 84     | 21.71 | 10.02 |
| MDCD                    |                           |                         | 2,606    | 7,136  | 1,093  | 3,182  | 14     | 30  | 12.80  | 9.43  | 2.60  |
| MDCR                    |                           |                         | 3,376    | 12,081 | 1,844  | 6,641  | 9      | 16  | 4.88   | 2.41  | 3.88  |
| Optum                   |                           |                         | 6,921    | 22,402 | 3,847  | 12,969 | 43     | 69  | 11.18  | 5.32  | 1.87  |
| Meta-analysis           |                           |                         | 17,930   | 59,044 | 9,273  | 31,176 | 120    | 199 | 12.94  | 6.38  | 1.45  |
| Apixaban vs Warfarin    |                           | CCAIE                   | 1,922    | 7,633  | 962    | 3,565  | 13     | 37  | 13.50  | 10.38 | 2.69  |
|                         |                           | MDCD                    | 1,214    | 4,565  | 485    | 1,953  | <5     | 21  | <10.30 | 10.75 | >3.85 |
|                         |                           | Optum                   | 4,087    | 12,615 | 2,279  | 7,179  | 12     | 37  | 5.26   | 5.15  | 2.54  |
|                         |                           | Meta-analysis           | 7,223    | 24,813 | 3,728  | 12,698 | <30    | 95  | <8.05  | 7.48  | >1.82 |
| Rivaroxaban vs Apixaban |                           | CCAIE                   | 4,590    | 5,197  | 2,152  | 2,426  | 47     | 23  | 21.83  | 9.48  | 1.96  |
|                         |                           | MDCR                    | 2,265    | 2,920  | 1,166  | 1,548  | <5     | 5   | <4.28  | 3.23  | >5.97 |
|                         |                           | Optum                   | 7,678    | 10,012 | 3,931  | 5,334  | 45     | 22  | 11.45  | 4.12  | 1.99  |
|                         |                           | Meta-analysis           | 14,533   | 18,129 | 7,251  | 9,310  | <97    | 50  | <13.38 | 5.37  | >1.59 |

AF, atrial fibrillation; C, comparator; CCAIE, IBM MarketScan® Commercial Database; IR, incidence rate; MDCD, IBM MarketScan® Multi-state Medicaid; MDCR, IBM MarketScan® Medicare Supplemental Beneficiaries; MDRR, minimal detectable relative risk; T, treatment; TAR, time-at-risk; VTE, venous thromboembolism.

**Online Resource 18.** After matching (adjusted) incidence rates by indication and exposure group; intent-to-treat, 1:100 PS matching

| Indication | T vs C                    | Database      | Patients |        | TAR    |         | Events |      | IR    |       | MDRR |
|------------|---------------------------|---------------|----------|--------|--------|---------|--------|------|-------|-------|------|
|            |                           |               | T        | C      | T      | C       | T      | C    | T     | C     |      |
| AF         | Rivaroxaban vs Warfarin   | CCAIE         | 2,909    | 6,495  | 5,230  | 11,139  | 53     | 93   | 10.13 | 8.35  | 1.65 |
|            |                           | MDCR          | 9,362    | 20,817 | 20,161 | 44,369  | 54     | 76   | 2.68  | 1.71  | 1.70 |
|            |                           | Optum         | 13,891   | 34,511 | 34,204 | 90,924  | 119    | 170  | 3.48  | 1.87  | 1.44 |
|            |                           | Meta-analysis | 26,162   | 61,823 | 59,596 | 146,434 | 226    | 339  | 3.79  | 2.32  | 1.29 |
|            | Apixaban vs Warfarin      | CCAIE         | 1,971    | 3,924  | 3,285  | 6,548   | 29     | 53   | 8.83  | 8.09  | 1.93 |
|            |                           | MDCD          | 1,518    | 3,732  | 2,406  | 7,205   | 12     | 33   | 4.99  | 4.58  | 2.51 |
|            |                           | MDCR          | 6,554    | 12,901 | 12,548 | 25,338  | 29     | 35   | 2.31  | 1.38  | 2.10 |
|            |                           | Optum         | 13,282   | 25,981 | 28,572 | 61,240  | 52     | 115  | 1.82  | 1.88  | 1.58 |
|            | Meta-analysis             | CCAIE         | 23,325   | 46,538 | 46,812 | 100,333 | 122    | 236  | 2.61  | 2.35  | 1.37 |
|            |                           | MDCR          | 3,086    | 8,440  | 6,038  | 15,341  | 48     | 124  | 7.95  | 8.08  | 1.62 |
|            |                           | Optum         | 7,949    | 27,637 | 20,940 | 62,248  | 47     | 110  | 2.24  | 1.77  | 1.71 |
|            | Dabigatran vs Warfarin    | CCAIE         | 7,126    | 38,367 | 21,969 | 108,418 | 60     | 204  | 2.73  | 1.88  | 1.61 |
|            |                           | MDCR          | 18,161   | 74,444 | 48,948 | 186,008 | 155    | 438  | 3.17  | 2.35  | 1.34 |
|            |                           | Meta-analysis | 5,091    | 8,240  | 8,077  | 11,992  | 82     | 95   | 10.15 | 7.92  | 1.54 |
|            | Rivaroxaban vs Apixaban   | MDCD          | 2,009    | 3,345  | 2,908  | 4,329   | 20     | 25   | 6.88  | 5.77  | 2.37 |
|            |                           | MDCR          | 9,444    | 18,474 | 17,578 | 29,716  | 51     | 62   | 2.90  | 2.09  | 1.75 |
|            |                           | Optum         | 17,478   | 39,594 | 34,657 | 67,124  | 118    | 143  | 3.40  | 2.13  | 1.46 |
|            |                           | Meta-analysis | 34,022   | 69,653 | 63,220 | 113,162 | 271    | 325  | 4.29  | 2.87  | 1.28 |
|            | Rivaroxaban vs Dabigatran | CCAIE         | 1,972    | 2,939  | 3,564  | 5,621   | 38     | 39   | 10.66 | 6.94  | 1.92 |
|            |                           | MDCR          | 4,028    | 6,135  | 9,306  | 15,374  | 30     | 29   | 3.22  | 1.89  | 2.11 |
|            |                           | Optum         | 4,729    | 5,991  | 13,055 | 17,502  | 57     | 54   | 4.37  | 3.09  | 1.71 |
|            |                           | Meta-analysis | 10,729   | 15,065 | 25,925 | 38,498  | 125    | 122  | 4.82  | 3.17  | 1.44 |
|            | Apixaban vs Dabigatran    | CCAIE         | 1,044    | 1,136  | 1,858  | 2,117   | 25     | 12   | 13.45 | 5.67  | 2.51 |
|            |                           | MDCR          | 2,172    | 2,453  | 4,562  | 5,257   | 10     | 15   | 2.19  | 2.85  | 3.07 |
| Optum      |                           | 3,102         | 3,476    | 7,397  | 8,661  | 19      | 28     | 2.57 | 3.23  | 2.27  |      |
| VTE        | Rivaroxaban vs Warfarin   | CCAIE         | 5,027    | 17,425 | 9,083  | 33,154  | 121    | 331  | 13.32 | 9.98  | 1.37 |
|            |                           | MDCD          | 2,606    | 7,136  | 5,041  | 16,015  | 51     | 156  | 10.12 | 9.74  | 1.55 |
|            |                           | MDCR          | 3,376    | 12,081 | 6,551  | 25,653  | 18     | 47   | 2.75  | 1.83  | 2.32 |
|            |                           | Optum         | 6,921    | 22,402 | 14,390 | 54,436  | 95     | 245  | 6.60  | 4.50  | 1.43 |
|            |                           | Meta-analysis | 17,930   | 59,044 | 35,067 | 129,259 | 285    | 779  | 8.13  | 6.03  | 1.23 |
|            | Apixaban vs Warfarin      | CCAIE         | 1,922    | 7,633  | 2,880  | 13,356  | 27     | 131  | 9.37  | 9.81  | 1.74 |
|            |                           | MDCD          | 1,214    | 4,565  | 1,695  | 8,398   | 11     | 86   | 6.49  | 10.24 | 2.01 |
|            |                           | Optum         | 4,087    | 12,615 | 6,766  | 26,193  | 25     | 116  | 3.69  | 4.43  | 1.73 |
|            |                           | Meta-analysis | 7,223    | 24,813 | 11,342 | 47,947  | 63     | 333  | 5.55  | 6.95  | 1.40 |
|            | Rivaroxaban vs Apixaban   | CCAIE         | 4,590    | 5,197  | 6,018  | 6,583   | 86     | 61   | 14.29 | 9.27  | 1.59 |
|            |                           | MDCD          | 2,095    | 2,407  | 2,411  | 2,683   | 35     | 16   | 14.51 | 5.96  | 2.20 |
|            |                           | MDCR          | 2,265    | 2,920  | 3,138  | 3,703   | 6      | 9    | 1.91  | 2.43  | 4.30 |
|            |                           | Optum         | 7,678    | 10,012 | 10,998 | 13,454  | 75     | 47   | 6.82  | 3.49  | 1.67 |
|            |                           | Meta-analysis | 16,628   | 20,536 | 22,565 | 26,425  | 202    | 133  | 8.95  | 5.03  | 1.36 |

AF, atrial fibrillation; C, comparator; CCAIE, IBM MarketScan® Commercial Database; IR, incidence rate; MDCD, IBM MarketScan® Multi-state Medicaid; MDCR, IBM MarketScan® Medicare Supplemental Beneficiaries; MDRR, minimal detectable relative risk; T, treatment; TAR, time-at-risk; VTE, venous thromboembolism.

**Online Resource 19. AF population: Rivaroxaban vs Warfarin, 1:100 PS matching**

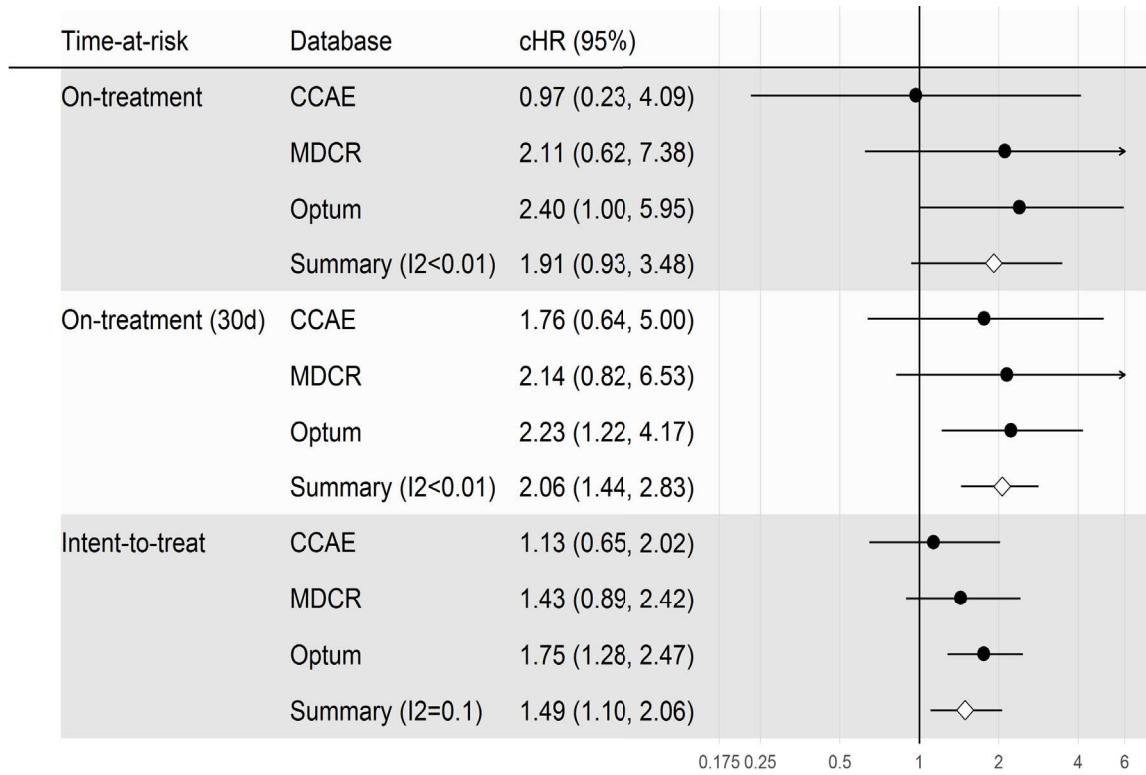

AF, atrial fibrillation; CCAIE, IBM MarketScan® Commercial Database; cHR, calibrated hazard ratio; MDCR, IBM MarketScan® Medicare Supplemental Beneficiaries; PS, propensity score.

**Online Resource 20.** AF population: Apixaban vs Warfarin, 1:100 PS matching

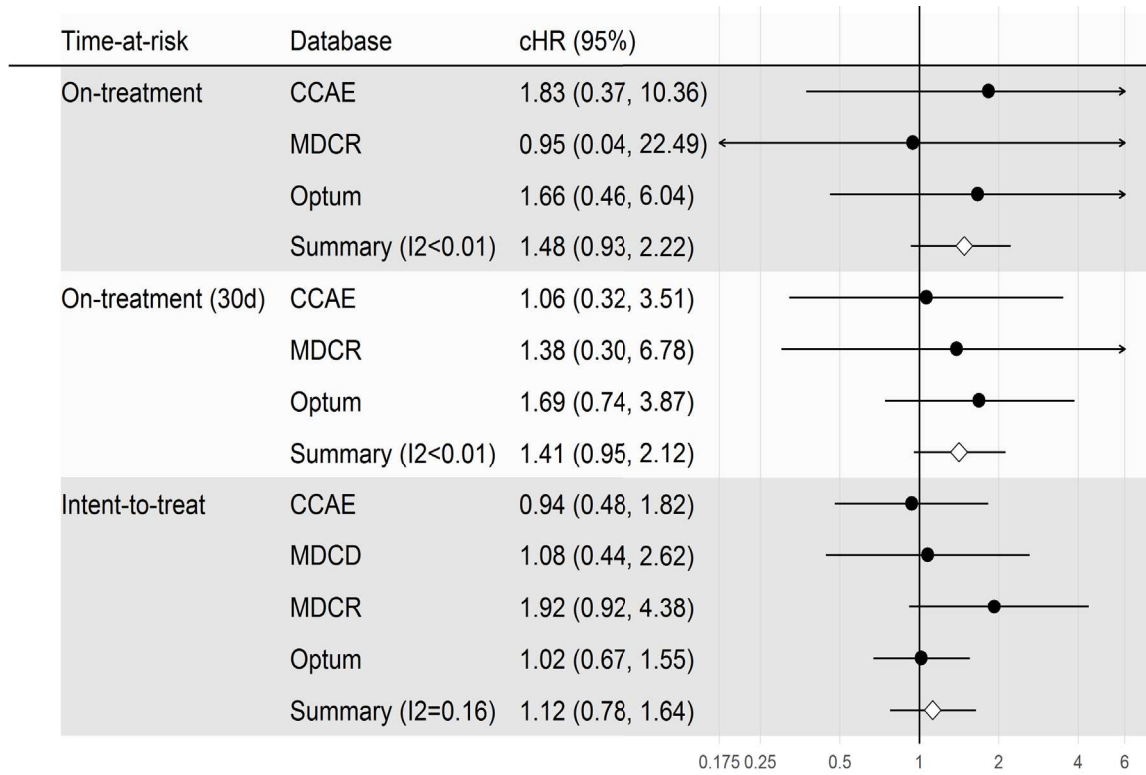

AF, atrial fibrillation; CCAIE, IBM MarketScan® Commercial Database; cHR, calibrated hazard ratio; MDCD, IBM MarketScan® Multi-state Medicaid; MDCR, IBM MarketScan® Medicare Supplemental Beneficiaries; PS, propensity score.

**Online Resource 21. AF population: Dabigatran vs Warfarin, 1:100 PS matching**

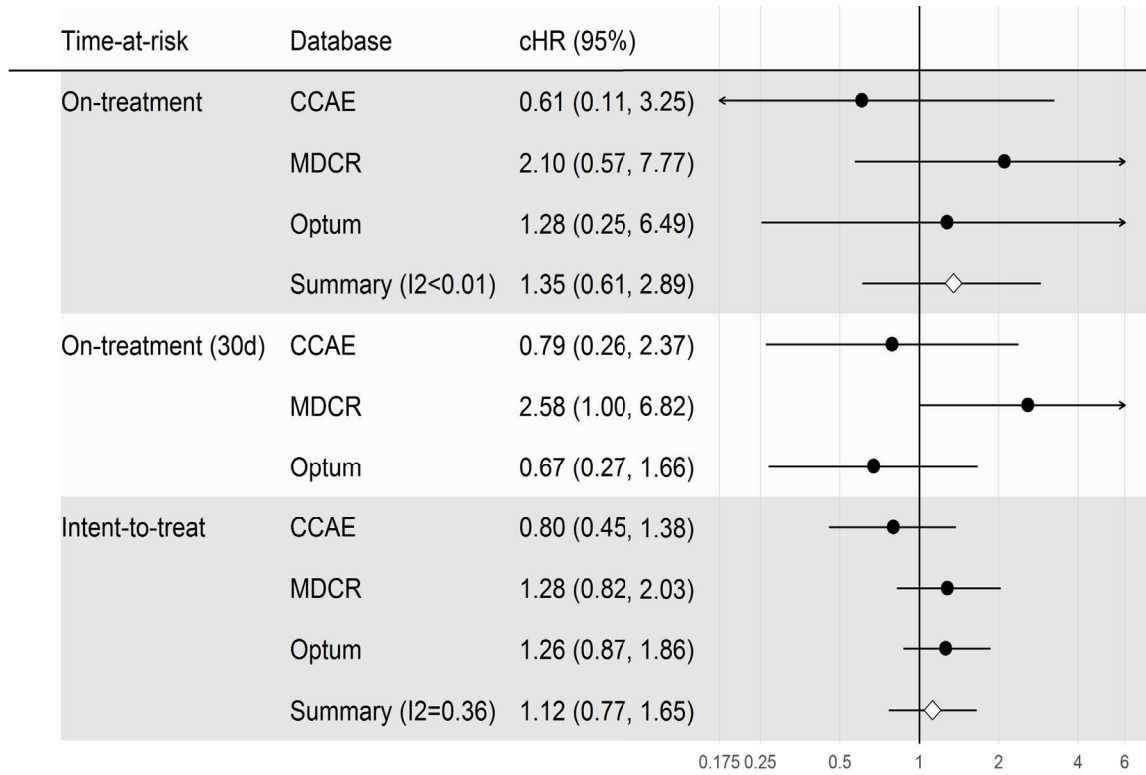

AF, atrial fibrillation; CCAIE, IBM MarketScan® Commercial Database; cHR, calibrated hazard ratio; MDCR, IBM MarketScan® Medicare Supplemental Beneficiaries; PS, propensity score.

**Online Resource 22.** AF population: Rivaroxaban vs Apixaban, 1:100 PS matching

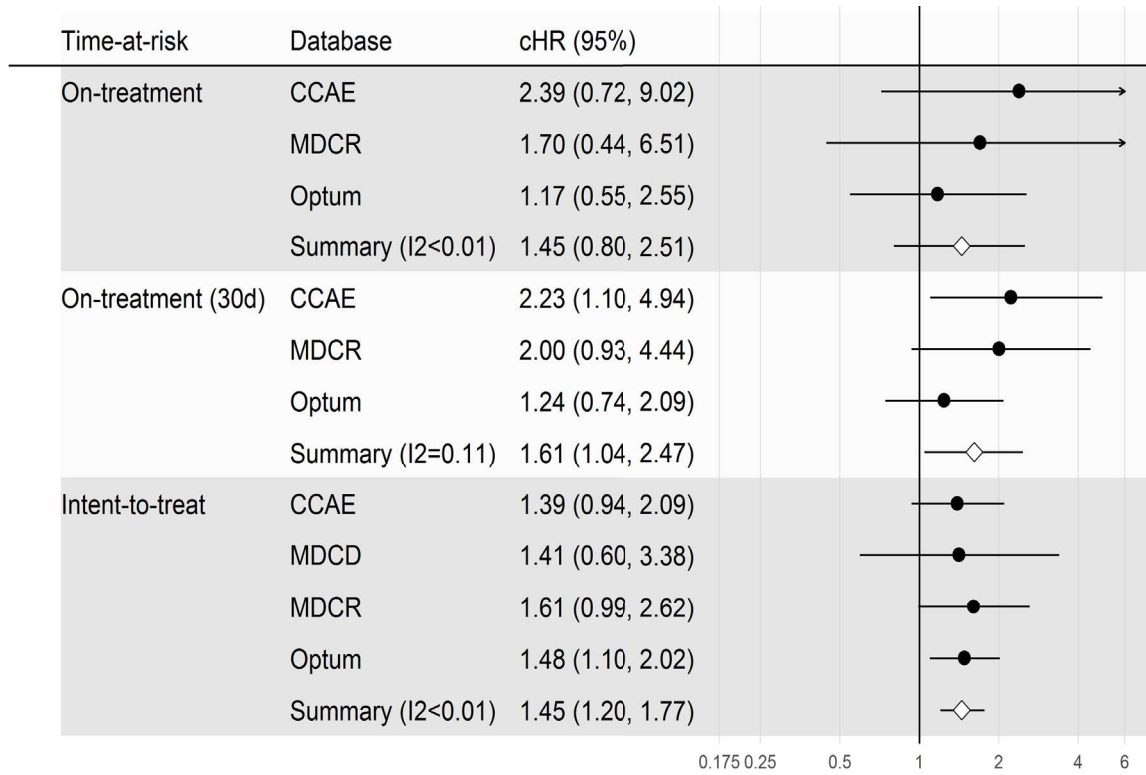

AF, atrial fibrillation; CCAIE, IBM MarketScan® Commercial Database; cHR, calibrated hazard ratio; MDCD, IBM MarketScan® Multi-state Medicaid; MDCR, IBM MarketScan® Medicare Supplemental Beneficiaries; PS, propensity score.

**Online Resource 23.** AF population: Rivaroxaban vs Dabigatran, 1:100 PS matching

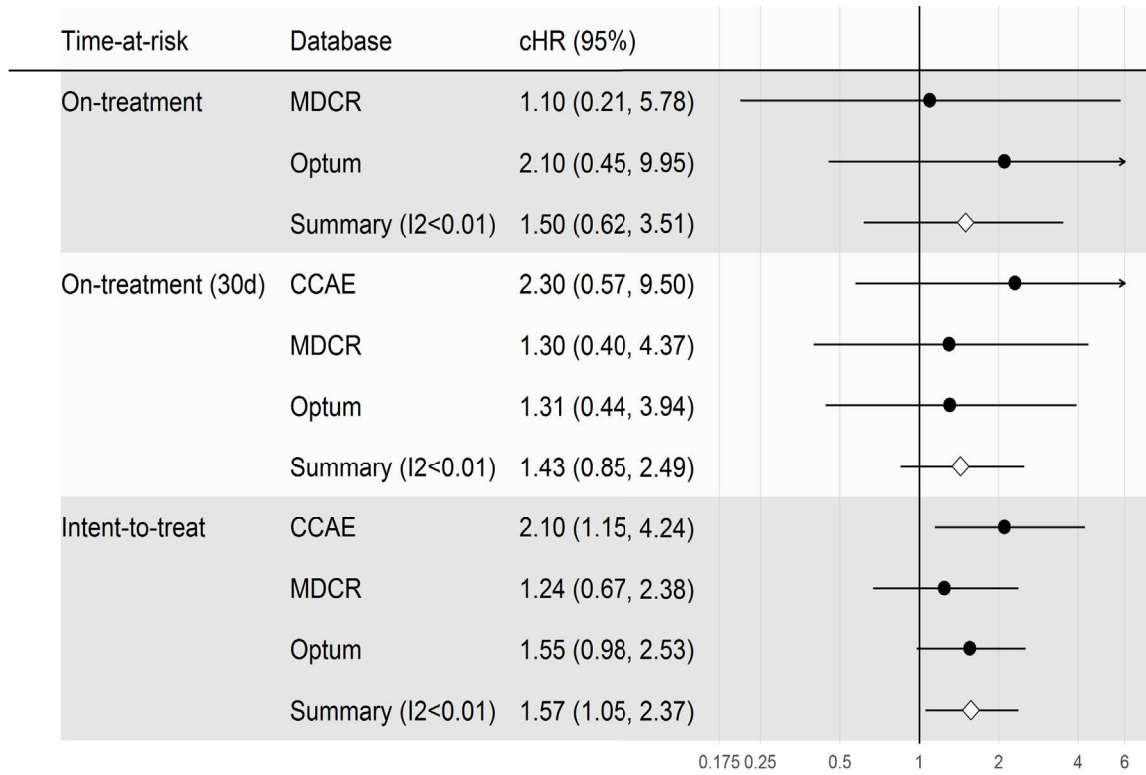

AF, atrial fibrillation; CCAE, IBM MarketScan® Commercial Database; cHR, calibrated hazard ratio; MDCR, IBM MarketScan® Medicare Supplemental Beneficiaries; PS, propensity score.



**Online Resource 24. AF population: Apixaban vs Dabigatran, 1:100 PS matching**

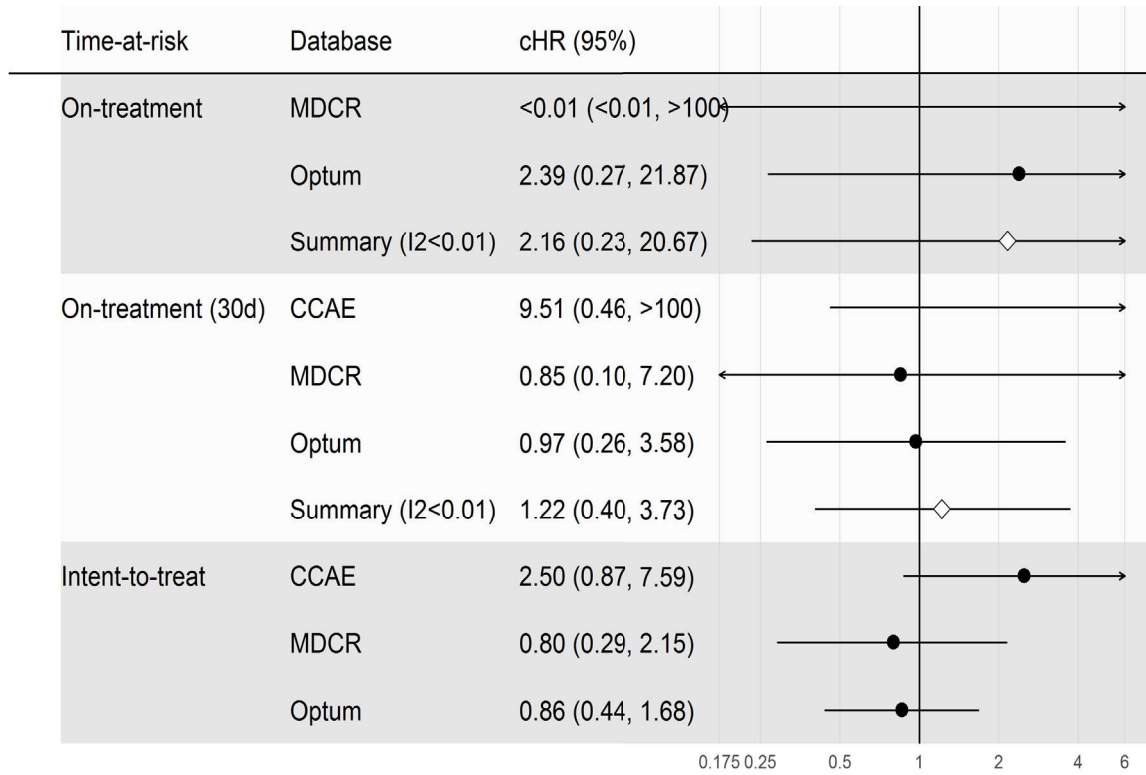

AF, atrial fibrillation; CCAE, IBM MarketScan<sup>®</sup> Commercial Database; cHR, calibrated hazard ratio; MDCR, IBM MarketScan<sup>®</sup> Medicare Supplemental Beneficiaries; PS, propensity score.

**Online Resource 25. VTE population: Rivaroxaban vs Warfarin, 1:100 PS matching**

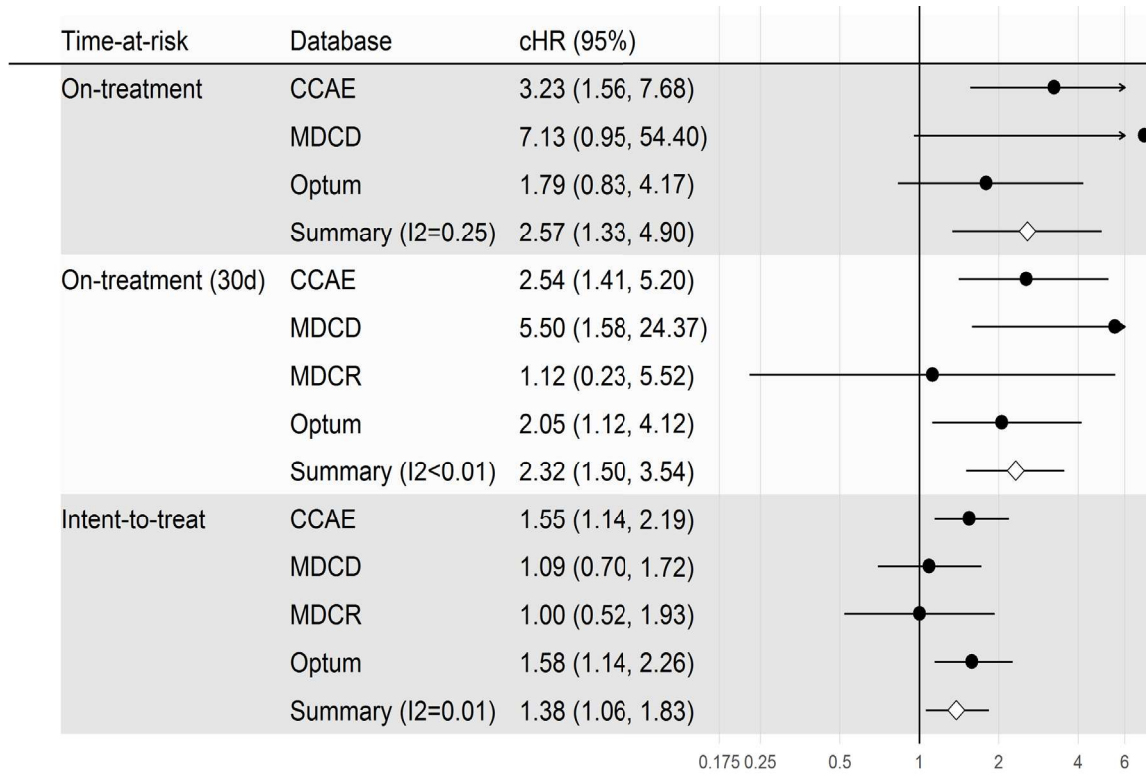

CCAIE, IBM MarketScan® Commercial Database; cHR, calibrated hazard ratio; MDCD, IBM MarketScan® Multi-state Medicaid; MDCR, IBM MarketScan® Medicare Supplemental Beneficiaries; PS, propensity score; VTE, venous thromboembolism.

**Online Resource 26.** VTE population: Apixaban vs Warfarin, 1:100 PS matching

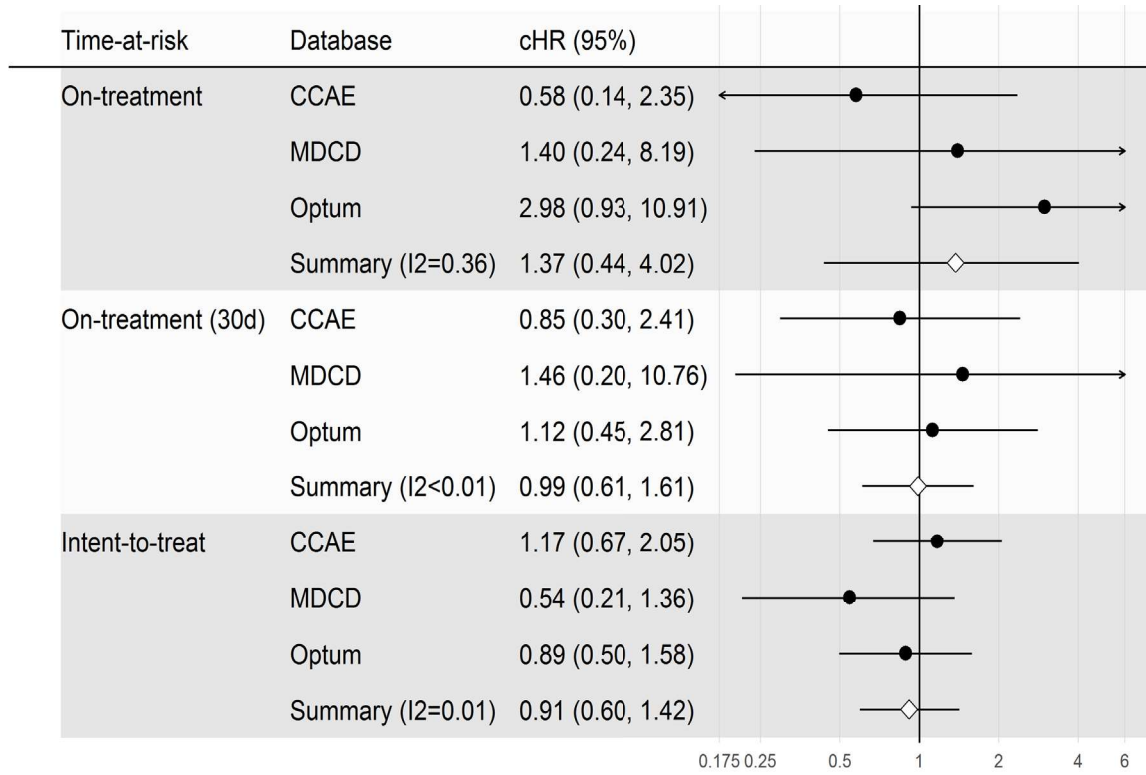

CCAIE, IBM MarketScan® Commercial Database; cHR, calibrated hazard ratio; MDCD, IBM MarketScan® Multi-state Medicaid; PS, propensity score; VTE, venous thromboembolism.

**Online Resource 27.** VTE population: Rivaroxaban vs Apixaban, 1:100 PS matching

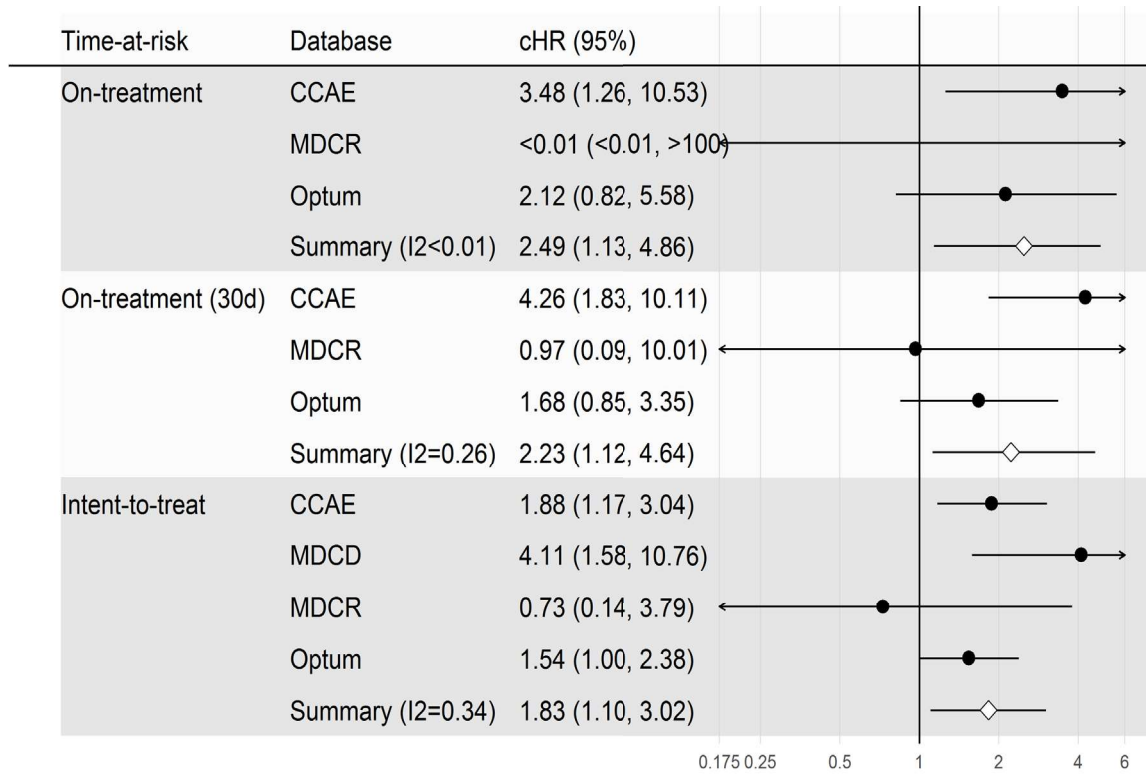

CCAIE, IBM MarketScan® Commercial Database; cHR, calibrated hazard ratio; MDCD, IBM MarketScan® Multi-state Medicaid; MDCR, IBM MarketScan® Medicare Supplemental Beneficiaries; PS, propensity score; VTE, venous thromboembolism.
